# Supplementary material for: Using facilitator–receiver peer dyads matched according to socioeconomic status to promote behaviour change in overweight adolescents: a feasibility study
Source: PubMed Central journal article supplement — BMJ Open. 2018 Jun 22;8(6):e019731. doi: 10.1136/bmjopen-2017-019731 (PMC6020946; doi:10.1136/bmjopen-2017-019731), 2018-06-22
Supplement: bmjopen-2017-019731.draft_revisions.pdf [file bmjopen-2017-019731.draft_revisions.pdf]

# BMJ Open

BMJ Open is committed to open peer review. As part of this commitment we make the peer review history of every article we publish publicly available.

When an article is published we post the peer reviewers' comments and the authors' responses online. We also post the versions of the paper that were used during peer review. These are the versions that the peer review comments apply to.

The versions of the paper that follow are the versions that were submitted during the peer review process. They are not the versions of record or the final published versions. They should not be cited or distributed as the published version of this manuscript.

BMJ Open is an open access journal and the full, final, typeset and author-corrected version of record of the manuscript is available on our site with no access controls, subscription charges or pay-per-view fees (<http://bmjopen.bmj.com>).

If you have any questions on BMJ Open's open peer review process please email [info.bmjopen@bmj.com](mailto:info.bmjopen@bmj.com)

# BMJ Open

## Using facilitator-receiver peer dyads matched according to socioeconomic status to promote behaviour change in overweight adolescents – a feasibility study

|                                 |                                                                                                                                                                                                                                                                                                                                                                                                                                                                                                                                                                                                                                                                                                                                                                                                                                                                                                                                                                                                           |
|---------------------------------|-----------------------------------------------------------------------------------------------------------------------------------------------------------------------------------------------------------------------------------------------------------------------------------------------------------------------------------------------------------------------------------------------------------------------------------------------------------------------------------------------------------------------------------------------------------------------------------------------------------------------------------------------------------------------------------------------------------------------------------------------------------------------------------------------------------------------------------------------------------------------------------------------------------------------------------------------------------------------------------------------------------|
| Journal:                        | <i>BMJ Open</i>                                                                                                                                                                                                                                                                                                                                                                                                                                                                                                                                                                                                                                                                                                                                                                                                                                                                                                                                                                                           |
| Manuscript ID                   | bmjopen-2017-019731                                                                                                                                                                                                                                                                                                                                                                                                                                                                                                                                                                                                                                                                                                                                                                                                                                                                                                                                                                                       |
| Article Type:                   | Research                                                                                                                                                                                                                                                                                                                                                                                                                                                                                                                                                                                                                                                                                                                                                                                                                                                                                                                                                                                                  |
| Date Submitted by the Author:   | 22-Sep-2017                                                                                                                                                                                                                                                                                                                                                                                                                                                                                                                                                                                                                                                                                                                                                                                                                                                                                                                                                                                               |
| Complete List of Authors:       | Saez, Laura; Universite de Lorraine Faculte de Medecine, EA 4360 APEMAC<br>Legrand, Karine; Nancy University Hospital, Epidemiology and clinical evaluation department; Universite de Lorraine Faculte de Medecine, EA 4360 APEMAC<br>Alleyrat, Camille; Nancy University Hospital, Epidemiology and clinical evaluation department<br>Ramisaso, Serge<br>Langlois, Johanne; Conservatoire National des Arts et Métiers; Universite de Lorraine Faculte de Medecine, EA 4360 APEMAC<br>Muller, Laurent; University of Lorraine<br>Omorou, Abdou ; Nancy University Hospital, Epidemiology and clinical evaluation department; Universite de Lorraine Faculte de Medecine, EA 4360 APEMAC<br>De Lavenne, Rozenn; Academy Rector of Nancy and Metz<br>Kivits, Joelle; Universite de Lorraine Faculte de Medecine, EA 4360 APEMAC<br>Lecomte, Edith; Conservatoire National des Arts et Métiers<br>Briançon, Serge; Universite de Lorraine Faculte de Medecine, EA 4360 APEMAC<br>Trial Group, PRALIMAP-INÈS |
| <b>Primary Subject Heading</b>: | Public health                                                                                                                                                                                                                                                                                                                                                                                                                                                                                                                                                                                                                                                                                                                                                                                                                                                                                                                                                                                             |
| Secondary Subject Heading:      | Qualitative research                                                                                                                                                                                                                                                                                                                                                                                                                                                                                                                                                                                                                                                                                                                                                                                                                                                                                                                                                                                      |
| Keywords:                       | peer education, overweight, health inequalities, sociocognitive theory, adolescent health                                                                                                                                                                                                                                                                                                                                                                                                                                                                                                                                                                                                                                                                                                                                                                                                                                                                                                                 |
|                                 |                                                                                                                                                                                                                                                                                                                                                                                                                                                                                                                                                                                                                                                                                                                                                                                                                                                                                                                                                                                                           |

SCHOLARONE™  
Manuscripts

1  
2  
3 **Title : Using facilitator-receiver peer dyads matched according to socioeconomic status to**  
4 **promote behaviour change in overweight adolescents – a feasibility study**

5  
6 Authors: Laura Saez<sup>a</sup>, Karine Legrand<sup>a,b</sup>, Camille Alleyrat<sup>b</sup>, Serge Ramisaso<sup>a</sup>, Johanne Langlois<sup>a,c</sup>,  
7 Laurent Muller<sup>d</sup>, Abdou Y. Omorou<sup>a,b</sup>, Rozenn De Lavenne<sup>e</sup>, Joëlle Kivits<sup>a</sup>, Edith Lecomte<sup>c</sup>, Serge  
8 Briançon<sup>a</sup>.

9  
10 PI trial Group: Philip Böhme<sup>f</sup>, Cécile Gailliard<sup>b</sup>, Céline Pourcher<sup>e</sup>, Marie-Hélène Quinet<sup>e</sup>,  
11 Elisabeth Spitz<sup>d</sup>, Brigitte Toussaint<sup>e</sup>.

12  
13  
14 a University of Lorraine, APEMAC EA 4360, Nancy, France

15 b INSERM, CIC-1433, CHRU Nancy, F-54 000, France

16 c National Conservatory of Arts and Crafts (CNAM), Nancy, France

17 d University of Lorraine, APEMAC EA4360, Metz, France

18 e Academy Rector of Nancy and Metz, Nancy, France

19 f University Hospital of Nancy, Department of diabetology, metabolic diseases and nutrition,  
20 Nancy, France

21  
22 Corresponding author: Laura Saez

23 Address: School of Public Health, 9 Avenue de la Forêt de Haye, 54500 Vandœuvre-lès-Nancy,  
24 France

25 Phone: 33 (0) 3 72 74 61 96

26 Fax: 33 (0) 3 72 74 62 04

27 Email: laura.saez@univ-lorraine.fr

28  
29 Word count : 7690  
30  
31  
32  
33  
34  
35  
36  
37  
38  
39  
40  
41  
42  
43  
44  
45  
46  
47  
48  
49  
50  
51  
52  
53  
54  
55  
56  
57  
58  
59  
60

## Abstract

### Objectives

Evaluate the feasibility of an innovative peer intervention promoting healthy nutritional behaviour which purposefully selected peer facilitators according to socioeconomic status to target less-advantaged overweight receivers.

### Setting

Nine high schools and 2 middle schools.

### Participants

One hundred and fifty-six adolescents were approached to become facilitators of which 18 were trained. Thirty-two of 56 potential receivers accepted the intervention.

### Intervention

The peer intervention was carried out in 2013-14 and embedded in the larger health programme PRALIMAP-INÈS. Facilitators were selected and trained to organise nutritional activities with specific peer receivers participating in the programme.

### Primary and secondary outcome measures

Different types of data were collected to assess demand, acceptability, implementation and practicality of the intervention. For the facilitators, this included 6 training sessions, 12 mid-programme interviews, 4 end-of-programme sessions, telephone notes and SMS exchanges. All 6 potential receivers in one school were also interviewed. Sociodemographic and health characteristics were also analysed.

### Results

Acceptance was more likely when asked by a peer compared to a professional (51.2% discordant pairs;  $P < 0.02$ ). Twelve activities, mostly based on physical activity and implemented during weekends or holidays, were carried out. The mean age of active receivers was 16 and their BMI was higher than other participants. For both facilitators and active receivers there were more participating girls. Qualitative analysis reveals key implementation challenges for facilitators. Interviews with the receivers highlight social difficulties with most feeling bad about their appearance and wanting to lose weight. Those who participated in peer activities were very positive about the experience especially social support.

### Conclusions

The present study suggests the peer intervention was feasible provided organisational difficulties are addressed. Good practice recommendations are formulated including a longer training session, organising a joint meeting with the facilitators and receivers, matching dyads on place of residence and multiplying modes of contact.

### Strengths and limitations of the study

- To the authors' knowledge this is the first intervention to purposefully select peer facilitators matched on the basis of the socioeconomic status of the receivers.
- The peer intervention is based on sociocognitive theory with a particular focus on peer modelling, peer support and practice opportunities for mastering desired behaviours as opposed to the traditional concept of peer education based on transmission of information.
- The intervention was embedded in a large-scale research study allowing systematic collection of data and an in-depth process analysis with different sources of qualitative material was also carried out to triangulate findings and grasp implementation challenges.

- 1  
2  
3 - Results provide an indication of the potential feasibility of the peer intervention but  
4 further research with a larger sample size is necessary to confirm findings on the  
5 characteristics of the participants and empirically evaluate the effectiveness of the  
6 intervention to improve the nutritional behaviour of the receivers.  
7

8 **Keywords:**

9 peer education, obesity, overweight, adolescents, physical activity, health inequalities, nutrition,  
10 sociocognitive theory  
11

12 **INTRODUCTION**

13  
14 Schools are considered to be ideal settings for health promotion interventions, particularly in  
15 the context of nutrition interventions[1–3]. Indeed, it has been argued that the school setting  
16 intrinsically exposes children to dietary and physical activity factors[4]. Furthermore, students  
17 spend a significant amount of their time in school for which attendance is often compulsory.  
18 This means that it is possible for interventions to reach almost all children, regardless of  
19 socioeconomic status in a relatively short time. For this reason, it has been suggested that the  
20 school setting may be particularly important in order to reduce health inequalities[5]. However,  
21 concerns have been raised about the fact that school interventions may not benefit all children  
22 equally and the need for specific examination of minority groups has been expressed[6,7].  
23

24  
25 One reason that school-based interventions may not benefit all children or adolescents equally  
26 could be the socioeconomic gap between health experts delivering the interventions and youth  
27 of low socioeconomic status. For example, in a French evaluation of peer-led health  
28 interventions, it was highlighted that young people are critical with regard to health prevention  
29 interventions carried out by professionals[6]. It is also believed that young people feel  
30 stigmatised by adults who consider them a “risky age group” and they do not feel implicated in  
31 health policies designed for them [8]. Furthermore, there seems to be an association between  
32 adolescent nutritional behaviour and that of family and friends suggesting involvement of  
33 adolescents’ social environment may enhance the effectiveness of nutritional interventions  
34 [9,10]. In fact, when health interventions are performed by peers, they seem to have a higher  
35 level of acceptability and age proximity is especially valued because of the belief that  
36 adolescents of the same age understand each other better than adults would[6]. The central  
37 tenet of the effectiveness of peer education is that the influence of peers and friends are likely to  
38 become more important as children get older[11]. For example, the review by Salvy and  
39 colleagues (2012)[11] highlights that young people are more physically active when in the  
40 company of peers and friends and overweight boys paired with non-overweight peers increase  
41 their physical activity to a level similar to the non-overweight peer.  
42

43  
44 Given these observations, a call has been made to increase the number of health promotion and  
45 prevention programmes in schools in France, especially those delivered by peers[6]. Peer  
46 education has been extensively implemented with encouraging results across settings and in  
47 several health domains, especially sexual health and HIV prevention[12–14] but also smoking  
48 prevention and substance use[15,16]. More recently, peer-based approaches have been  
49 described as promising avenues for nutritional behaviour change with positive results including  
50 weight loss, reduction in waist circumference, less sedentary behaviour, improved attitudes  
51 towards healthy eating and exercise and increased self-efficacy[2,17–24]. Across domains, a key  
52 recommendation for school-based interventions is that they be behaviourally focussed[7].

53  
54 Despite promising results, the evidence for the effectiveness of peer education is unclear and  
55 one reason that has been put forward is the lack of theoretical embedding of the  
56 interventions[16,25,26]. In the present study, the choice was made to use sociocognitive theory  
57 as the theoretical basis of the intervention[27], with a particular focus on peer modelling as well  
58

1  
2  
3 as increasing self-efficacy through peer support and practice opportunities for mastering the  
4 desired behaviours. This concept of the role of peer interveners overlaps with two types of peer  
5 interventions as recently defined by Bagnall and colleagues[28]. The first is peer mentoring as  
6 “the development of a relationship between two individuals where the mentee is able to learn  
7 from the mentor, model positive behaviour and gain experience, knowledge or skills”. The  
8 second is peer support which “seeks to promote health and build people’s resilience to different  
9 stressors”[28].

10  
11 In terms of carrying out peer interventions in schools, it is important to note that the school  
12 setting can have a negative impact on the self-appraisal of overweight students through its  
13 normative structure[29]. This has at least one key implication for peer intervention  
14 programmes: it is important to offer the possibility of doing peer activities outside of the school  
15 context, in a new environment which is more conducive to positive self-appraisal. The peer  
16 intervention was therefore implemented as part of a larger health programme in the school  
17 setting but designed to be behaviourally focussed and non-formal in its educational approach.

18  
19 The objective of this feasibility study was therefore to develop and evaluate a peer intervention  
20 to promote physical activity and healthy eating which did not widen health inequalities by  
21 purposefully selecting adolescent peer facilitators that were also of low socioeconomic status in  
22 order to target less-advantaged overweight adolescents. Given the innovative method of  
23 selecting less-advantaged adolescents as peer interveners, the feasibility study aimed to assess  
24 the earlier stages of intervention development as highlighted by Bowen and colleagues [30],  
25 namely intervention acceptability, demand, implementation and practicality.

## 26 27 **METHODS**

### 28 29 **PRALIMAP-INÈS study**

30  
31 The current study was carried out during the 2013-14 academic year within a larger research  
32 programme, PRALIMAP-INÈS (Promotion de l’ALIMENTation et l’Activité Physique-INEgalité de  
33 Santé), running over a three-year period for the prevention of overweight and obesity in France.  
34 The study protocol of PRALIMAP-INÈS has been described in detail elsewhere[31]. Briefly,  
35 PRALIMAP-INÈS is a mixed quasi-experimental and experimental interventional prospective  
36 trial aimed at overweight and obese adolescents aged 13 to 18 attending grades 9 and 10 in  
37 state-run middle-schools and high-schools in the Vosges department (north-eastern France). At  
38 the beginning of the school year a screening process was carried out in the school setting (T0).  
39 All adolescents were measured and those with a Body Mass Index (BMI) greater than the  
40 International Obesity Task Force (IOTF) overweight thresholds for age and gender[32], or with  
41 a waist circumference greater than the McCarthy cut-off values for age and gender, also filled  
42 out several questionnaires and were offered a series of interventions. Socioeconomic status  
43 (SES) was measured by the WHO Family Affluence Scale (FAS) questionnaire[33,34] and a score  
44 equal or below 5 was considered to indicate less-advantaged status. At the end of the academic  
45 year (T1), students were measured again and filled out several questionnaires including their  
46 appreciation of the programme and its components. The trial was approved by the French  
47 consultative committee for treatment of information in health research (no. 12.299), the French  
48 National Commission for Data Protection and Liberties (no. 912372) and the French Persons  
49 Protection Committee (no. 2012/15).

### 50 51 **Peer intervention description and logic model**

52  
53 As part of the PRALIMAP-INÈS programme, the current feasibility study focussing on the peer  
54 intervention was integrated and targeted at adolescents of the “less advantaged with standard  
55 and strengthened-care » (L.A.S.S) group during the 2013-14 academic year, representing 262  
56 adolescents. In the sense that the role of the peer interveners was to encourage physical activity  
57

1  
2  
3 and healthy eating, the term “facilitator” is preferred and “receivers” for those receiving the  
4 intervention.

5  
6 The peer intervention was based on sociocognitive theory which posits four mechanisms  
7 potentially important for self-efficacy and consequently the possibility of behaviour change: 1)  
8 performance outcomes, activated here by successfully carrying out nutritional activities  
9 (mastery experiences), 2) vicarious experiences, observing facilitators carry out nutritional  
10 activities, 3) verbal persuasion, facilitators should encourage positive nutritional behaviour and  
11 4) emotional arousal which may in the present intervention entail positive emotions through  
12 social interaction with the facilitators during nutritional activities [27]. It was expected that  
13 through simple contact with the facilitators and other peers involved in the intervention, peer  
14 receivers would benefit from general social support and develop interpersonal skills. Carrying  
15 out nutritional activities with the facilitators was expected to bring information exchange,  
16 increased self-efficacy as well as support for the target behaviour change.

17  
18 In order to carry out the peer intervention, two types of peer facilitator were selected: peer  
19 ambassadors were adolescents having participated in the PRALIMAP-INÈS programme the  
20 previous year and peer entrepreneurs were adolescents screened at the beginning of the school  
21 year in 2013 and having no previous experience of the programme. Both peer ambassadors and  
22 entrepreneurs were selected according to the following criteria: an ability to control their  
23 weight as evaluated by a physician, motivation to become peer facilitators and an FAS score  $\leq 5$   
24 suggesting that they were of similar socioeconomic background as the peers they would be  
25 organizing activities with. In addition to similarity in socioeconomic background, facilitators  
26 were peers in terms of attending the same school and age similarity; the ambassadors being a  
27 year older and the entrepreneurs being from the same year group.

28  
29 Peer facilitators received a 2-hour training session delivered during school time at the  
30 beginning of the academic year by a member of the PRALIMAP-INÈS team responsible for the  
31 peer intervention (LS). Training sessions were carried out in groups ranging from 2 to 4  
32 adolescents and if it was not possible to regroup potential facilitators, training was done on an  
33 individual basis. The first part of the training session invited each adolescent to present  
34 him/herself and to consider why they would be a good facilitator in terms of skills and  
35 motivation. The objective of this part of the training session was to reinforce motivation and  
36 feelings of self-efficacy of the adolescents. The next part of the training session consisted in  
37 presenting the role of facilitator and brainstorming potential activities to be carried out and  
38 resources they could call upon to help them with this task. By brainstorming activities together,  
39 adolescents could be inspired from each other's ideas, get direct feedback in order to detail the  
40 implementation of their ideas with a focus on feasibility and start understanding more  
41 concretely what their role would entail. Another key moment of the training session was role  
42 playing key situations that the facilitators may face including: initial contact with the receivers  
43 and difficulties motivating receivers. Each role play was followed by feedback from the  
44 participants and observers as well as debriefing tips. Satisfaction with the training session was  
45 evaluated at the end of the session.

46  
47 Following the training session, the facilitators who wished to continue were assigned a small  
48 group of peers which they had to contact and with which they were encouraged to develop  
49 activities based on their common interests to pursue throughout the academic year. The initial  
50 target was to organise and carry out 4 activities anytime in the school year. Great freedom was  
51 given to the facilitators as regards the choice of activities, whether they aimed at physical  
52 activity or healthy eating, as well as the time, place and implementation method of their chosen  
53 activities. The facilitators discussed their chosen activities with the programme coordinator  
54 (LS) and financial support was offered if it was necessary for the implementation of the  
55 activities.

1  
2  
3 Throughout the school year, facilitators were contacted on a regular basis for follow-up and  
4 support for the implementation of the nutritional activities with their receivers in the form of  
5 telephone calls as well as text messages (SMS) by the programme coordinator (LS). A mid-  
6 programme face-to-face interview was also carried out with each of the facilitators in order to  
7 maintain their motivation and allow a more in-depth exchange on the implementation  
8 challenges they faced. At the end of the academic year, all facilitators were invited to a formal  
9 end-of-programme session and they were rewarded for their time and effort with a certificate.

### 10 Feasibility criteria, material and analysis

11  
12 Demand was evaluated by gathering expressed interest and participation rates of the peer  
13 intervention, for ambassadors, entrepreneurs and receivers. Expressed interest for being an  
14 ambassador, entrepreneur and receiver was obtained by a member of the PRALIMAP-INÈS team  
15 at the beginning of the school year during the screening process. The intervention was then  
16 offered a second time to the receivers directly by their allocated facilitator which enabled a  
17 comparison of expressed interest of receivers whether the intervention was offered by a  
18 professional or a peer.  
19

20  
21 Acceptability of the intervention was assessed in terms of satisfaction and perceived  
22 appropriateness. Implementation was evaluated in terms of how many, what type and when  
23 nutritional activities were carried out, as well as assessing the type and extent of support  
24 needed from the programme coordinator in terms of number and purpose of SMS exchanges  
25 and calls. Finally, practicality was evaluated by a detailed analysis of the factors affecting  
26 implementation ease or difficulty. In order to answer these research questions, the training  
27 sessions, mid-programme interviews and end-of-programme sessions, on top of their  
28 functionality within the peer intervention programme, also served as focus groups. They were  
29 all audio recorded, with the consent of the adolescents present, and transcribed. The material  
30 was then coded in NVivo10 by performing a thematic analysis. Telephone notes of each  
31 conversation with the facilitators and all SMS exchanges were also added to NVivo and coded.  
32 All these sources were analysed together to obtain a general view of acceptability,  
33 implementation and practicality from the point of view of the facilitators.  
34

35 Furthermore, in order to gain more insight into the experience of the receivers, all 6 potential  
36 receivers from one high school, whether they chose to participate or not, were invited for an  
37 individual interview. These interviews were also transcribed, added to the NVivo database and  
38 coded using the same coding grid as the analysis on the facilitators in terms of their experience  
39 of the peer intervention but with an additional focus on the characteristics of the potential  
40 receivers in particular the following two themes: friendship and other peers (definition and  
41 number) and health and overweight (definition and personal experience).  
42

43 A descriptive analysis was also undertaken on the information on facilitators and receivers  
44 collected by measures and questionnaires as part of the larger PRALIMAP-INÈS at the start and  
45 end of the school year. Physical activity and sedentary behaviour were measured by the  
46 International Physical Activity Questionnaire (IPAQ) [35], the EAT-26[36,37] screened for  
47 anorexia and bulimia symptoms, the HAD[38] screened for anxiety and depression symptoms  
48 and the Kidscreen[39] explored perceived health and quality of life. Study sample  
49 characteristics (age, gender, school type, FAS, BMI) and health scores (physical activity level,  
50 total EAT-26 score, total HAD score as well as individual scores for anxiety and depression and  
51 the Kidscreen score) were described using percentages for categorical variables and mean  $\pm$  SD  
52 (standard deviation) for quantitative variables. Statistical analyses were carried out using SAS  
53 9.4 (SAS Inst., Cary, NC, USA).  
54

55 The main research questions to assess feasibility and how each source of data collected and  
56 analysed contributed to answering those questions is summarized in Supplementary file 1.  
57  
58  
59



1  
2  
3 The facilitator training sessions, mid-programme interviews, end-of-programme sessions as  
4 well as the follow up of the facilitators by phone calls and SMS exchanges were designed and  
5 carried out by the peer intervention coordinator (LS). Receiver individual interviews were  
6 designed and carried out by an MSc student (SR) in collaboration with the peer intervention  
7 coordinator. All material was coded in NVivo by the peer intervention coordinator.

8  
9 To illustrate main qualitative results, quotes from the facilitators and receivers were selected  
10 and translated from French into English.

## 11 RESULTS

### 12 Recruitment and participation

13  
14  
15  
16 The flow chart illustrating the recruitment process of facilitators is illustrated in Figure 1. Of the  
17 39 eligible ambassadors and 117 entrepreneurs, 20 and 36 adolescents accepted to become a  
18 peer facilitator respectively. Of the 39 facilitators who volunteered and were contacted, 18 were  
19 able to benefit from a training session in school. The reasons for not benefiting from a training  
20 session are diverse and include: not answering, changing their mind about participating and  
21 also not having enough receivers in the school to justify training a facilitator. The 18 facilitators  
22 benefiting from a training session came from 10 different schools and in total 6 training  
23 sessions were carried out. Of a 4 point score, the average global satisfaction with the training  
24 session was 3.8 with scores ranging from 3.6 to 3.9 for having had a nice time, finding the  
25 training session useful, that the training session met their expectations, that it was sufficiently  
26 long and that they felt ready to become facilitators. When asked what they enjoyed most, of the  
27 18 trained facilitators, 13 spontaneously reported the role plays.

28  
29 INSERT Figure 1

30  
31 The recruitment process for the receivers is detailed in Figure 2. Of the 151 receivers for which  
32 there was a trained facilitator in the school who continued after training, 56 were randomly  
33 selected for contact by the facilitators. Of the 56 potential receivers, 25 did not formally accept  
34 the peer intervention of whom only 8 actually declining to participate. Thirty-two accepted the  
35 proposition and at the end of the peer intervention, 8 adolescents had benefited from at least  
36 one nutritional activity with a facilitator. Twenty-four adolescents did not benefit from an  
37 activity which, in the majority of cases, was due to the facilitator not managing to organise one.  
38 Another main reason for not benefiting from an activity is not being able to join for a variety of  
39 reasons such as not having transport or timetable clashes. Another interesting result is that  
40 willingness to participate in a peer-led intervention had already been asked by a professional at  
41 the beginning of the year during the measurement and screening process. For the 45 potential  
42 receivers who gave an answer both to the professional and to the facilitator later on, there was a  
43 significant difference of acceptance of the peer intervention with receivers more readily  
44 accepting when offered by a peer rather than a professional (MacNemar  $X^2=6.55$ ; 51,2%  
45 discordant pairs;  $P<0.02$ ). Of note is that of the 32 potential receivers who accepted the peer  
46 intervention, only 7 had declared lacking friends with which to do physical activity in the IPAQ  
47 questionnaire.

48  
49 INSERT Figure 2

### 50 Characteristics of facilitators and receivers

51  
52  
53 Characteristics of the 12 facilitators and 8 active receivers are described in Table 1. Individual  
54 characteristics of each facilitator and receiver are presented in Supplementary file 2. Of the 12  
55 facilitators that continued after the training session, there were twice as many girls as boys.  
56 Facilitators were aged between 14 and 17, with ambassadors naturally being older than the  
57

entrepreneurs on average since they belong to the year group above. The average age of active receivers is higher than the entrepreneurs, even though they came from the same year group. The BMI of the facilitators ranged from 20 to 29. Ambassadors who continued were mostly from professional high schools. Interestingly, entrepreneurs tended overall to have better health scores than the ambassadors and the receivers which may be linked to the difference in BMI. The receivers who carried out a nutritional activity seemed generally already quite active in their lives in terms of level of physical activity.

Table 1: Characteristics of entrepreneurs, ambassadors and receivers

|                            |                                             | Entrepreneurs | Ambassadors | Receivers | Complete<br>LA.SS group |
|----------------------------|---------------------------------------------|---------------|-------------|-----------|-------------------------|
| N                          |                                             | 7             | 5           | 8         | 262                     |
| Gender                     | Boy                                         | 2             | 2           | 3         | 114                     |
|                            | Girl                                        | 5             | 3           | 5         | 148                     |
| School type                | General and<br>technological<br>High School | 3             | 1           | 2         | 91                      |
|                            | Professional<br>High School                 | 2             | 4           | 5         | 117                     |
|                            | Middle School                               | 2             | 0           | 1         | 54                      |
|                            |                                             |               |             |           |                         |
| Age                        |                                             | 15.1          | 16.0        | 16.0      | 15.4                    |
| BMI                        |                                             | 22.3          | 27.0        | 28.8      | 26.8                    |
| FAS score                  |                                             | 4.0           | 4.6         | 4.3       | 4.1                     |
| EAT 26 score               |                                             | 8.1           | 13.5        | 14.5      | 13.8                    |
| HAD score                  |                                             | 18.0          | 25.2        | 28.6      | 28.7                    |
| Anxiety score              |                                             | 30.5          | 33.3        | 38.7      | 34.9                    |
| Depression score           |                                             | 14.3          | 17.1        | 18.5      | 23.7                    |
| Physical activity<br>level | High                                        | 3             | 0           | 2         | 61                      |
|                            | Moderate                                    | 1             | 2           | 6         | 96                      |
|                            | Low                                         | 1             | 3           | 0         | 77                      |
|                            | Missing                                     | 2             | 0           | 0         | 28                      |
| Kidscreen score            |                                             | 48.0          | 47.4        | 47.1      | 46.6                    |

\*Data was collected during the screening session at the start of the 2013-14 academic year

\*\*Data was collected at the follow-up visit at the end of the 2012-13 academic year

The 32 receivers who agreed to participate in the peer intervention had a higher BMI than the 25 who didn't give a positive answer and this result approached significance ( $P=0.07$ ). There were no other statistically significant differences between these two groups in terms of age, gender, school type, deprivation index as well as anxiety, depression, bulimia or anorexia symptoms, physical activity as well as perceived health and quality of life. The 8 receivers having carried out an activity were significantly older (15.3 vs 16.1  $P=0.018$ ) than the 24 adolescents having said yes but who did not, for various reasons, participate in an activity. There was no significant difference between the adolescents who agreed to become facilitators and those who didn't, both for entrepreneurs and ambassadors on any of the above-mentioned variables.

### Nutritional activities and other tasks

Several tasks were considered important in order to be a successful facilitator. Facilitators had to think of, plan and implement an activity without giving up during the school year. In order to be considered successful they also had to come to the training session, the mid-programme

interview and the end-of-programme session. Of the 12 facilitators, 4 were considered to be very successful, having achieved all or the majority of the above-mentioned tasks.

It is clear that the task of implementing an activity was difficult for the facilitators as only half managed to do so, despite the vast majority having managed to think of and plan one. Furthermore, 3 facilitators formally quit before the end-of-programme session and 1 more tacitly quit by no longer answering any messages or calls.

In total, 12 nutritional activities were carried out by 6 facilitators (see Table 2). Facilitators who did manage to plan and implement an activity then usually implemented 2 or more activities. Facilitators had a clear preference for organising activities centred on physical activity (10) rather than healthy eating (2) and they preferred organising activities during holidays or weekends, not on school days. Walking was a simple but popular activity amongst facilitators and receivers.

Although each facilitator was initially tasked with contacting several receivers and organising group activities, in practice activities were carried out in dyads. Only two activities were carried out in a group, both for healthy eating activities. In fact, only one facilitator managed to organise activities with two different receivers. Furthermore, one facilitator was only able to carry out an activity by including her usual friends.

Table 2: Nutritional activities carried out by the facilitators

| Day      | Activity        | Type              | Receiver*      | Facilitator* |
|----------|-----------------|-------------------|----------------|--------------|
| weekday  | Walking         | Physical Activity | R4b            | F4           |
| weekday  | Cooking a meal  | Healthy Eating    | R5a and R5b    | F5           |
| holidays | Walking         | Physical Activity | R6             | F6           |
| holidays | Walking         | Physical Activity | R6             | F6           |
| holidays | Walking         | Physical Activity | R6             | F6           |
| holidays | Football        | Physical Activity | R1             | F1           |
| holidays | Biking          | Physical Activity | R1             | F1           |
| weekend  | Walking         | Physical Activity | R4a            | F4           |
| weekend  | Walking and Wii | Physical Activity | R3             | F3           |
| weekend  | School meal     | Healthy Eating    | R2 and friends | F2           |
| weekend  | Basketball      | Physical Activity | R1             | F1           |
| weekend  | Fitness trail   | Physical Activity | R3             | F3           |

\*Individual receivers and facilitators are anonymously numbered with the number of the facilitators corresponding to the number of their matched receiver(s).

Although potential ambassadors were considerably more likely to accept becoming a facilitator than potential entrepreneurs (see Figure 1), entrepreneurs were much more likely to manage to organise and implement a nutritional activity with a receiver: 5 of the 6 who managed were entrepreneurs.

### Facilitator need for support

The difficulty of organising nutritional activities for the facilitators is reflected in the acute need for support which is highlighted by the important number of SMS exchanges and calls between the coordinator and the facilitators (Table 3). The detail of the SMS exchanges and calls with each facilitator is presented in Supplementary file 3.

Table 3: Number and content of SMS exchanges and phone conversations between the coordinator and the facilitators

|                   | Entrepreneurs | Ambassadors |
|-------------------|---------------|-------------|
| <b>SMS (mean)</b> |               |             |

|                     |       |      |
|---------------------|-------|------|
| Plan training       | 4.0   | 2.6  |
| Plan call           | 28.6  | 34.2 |
| Plan interview      | 5.4   | 6.0  |
| Activity feedback   | 33.3  | 7.8  |
| Plan end session    | 9.3   | 7.8  |
| Total SMS sent      | 105.4 | 81.6 |
| Total received      | 85.6  | 78.2 |
| Number contact days | 43.3  | 37.4 |
| % no answer         | 13.1  | 11.7 |
| <b>Call (mean)</b>  |       |      |
| Missed call         | 7.3   | 7.8  |
| Phone conversation  | 10.6  | 7.2  |
| % missed            | 30.0  | 31.8 |

The SMS exchanges and telephone calls underline that intense support was necessary, whether the facilitators were more successful or not and also whether they managed to implement an activity or not. The total number of SMS sent to the facilitators ranges from 24 and 180 with corresponding contact days between 12 and 67. Between 4 and 15 telephone conversations on different days were also carried out with each facilitator.

In terms of content of the SMS exchanges, activity feedback was the main purpose of the SMS exchanges but this is closely followed by planning phone meetings for more in-depth conversations. The most successful facilitators had a maximum of 20% missed calls and for all but one, less than 10% no response rate to received SMS suggesting that despite constraints, they were organised and reliable. A general observation can also be made in that the percentage of missed calls is much higher in general than the percentage of non-response to SMS contact, suggesting that adolescents prefer this mode of contact. The fact that entrepreneurs, much more often than ambassadors, successfully implemented activities is reflected by the higher number of contact days, total SMS exchanges and phone conversations.

### Insights from interviews, focus groups and process data

#### Facilitator views

The most illustrative quotes from the 6 training sessions, 12 mid-programme interviews, 4 end-of-programme sessions, telephone notes and SMS exchanges are presented in Supplementary file 4.

#### *Main challenges*

##### *Organizational issues*

All facilitators encountered organizational issues, whether they managed to carry out an activity or not. However, each facilitator seemed to be faced with a different combination of challenges indicating that none is in itself impossible to overcome. Major organizational issues, concerning 8 of the 12 facilitators or more include lack of time, their own or that of their receivers, as well as timetable clashes, transport problems and remembering to carry out all the necessary tasks for organising the activity. These organisational issues were so common they were evidenced in all types of process data. An unforeseen major problem was the amount of time spent away doing internships for some students in professional high schools. Other common issues included having difficulties with the logistical organisation but also bad weather which some facilitators considered as problematic.

1  
2  
3 Furthermore, a very widespread but surprising difficulty, given it was specifically addressed  
4 during training, was the lack of ideas for what activities to organize. This was very present in  
5 the telephone notes as well as several SMS exchanges.

6  
7 Another unexpected organizational difficulty was contacting the facilitators, even the very  
8 successful ones. Common issues were changing numbers and phones but also having  
9 dysfunctional phones or sometimes not having a mobile phone for a certain amount of time  
10 before getting a new one. Several difficulties were also specific to working with less advantaged  
11 adolescents such as limited phone credit. The difficulty in contacting the facilitators is  
12 consistent with the sheer number of SMS sent to each facilitator (see Table 3). These  
13 communication problems were also extremely frequent between the facilitators and the  
14 receivers. In fact, not having a mobile phone was often a reason for giving up on trying to  
15 organize an activity with a receiver. This happened to at least three facilitators.

#### 16 17 *Increased need for support*

18 Related to the organizational issues mentioned above, a general finding is that even more  
19 support would be necessary to facilitate implementation at several levels of the peer  
20 intervention. Two facilitators expressed the need for help organising activities, even though 1  
21 had managed to implement 3 activities. More specific help for the initial meeting with the  
22 receivers was also mentioned by 4 facilitators. This finding is consistent with the result that  
23 knowing the receivers to contact, at least by sight, greatly enhanced the success of facilitators.  
24 Indeed, knowing the receiver by sight was the case of all the facilitators having managed to  
25 implement an activity.

#### 26 27 *Motivation issues*

28 The motivation of the facilitators fluctuated throughout the programme. Facilitators got  
29 frustrated when they were not able to organize an activity or when they felt that the receivers  
30 were not very motivated. The lack of motivation of the receivers manifested itself in several  
31 ways. Six facilitators experienced not receiving an answer from a receiver or a receiver not  
32 turning up to the planned activity, although the latter only happened once. Generally, all  
33 facilitators were confronted with some receivers not being very motivated and this was  
34 evidenced in all types of process data. For some receivers, the peer intervention was rejected  
35 because it belonged to the wider PRALIMAP-INÈS programme which they had decided not to  
36 participate in.

#### 37 38 *Programme clarity*

39 A main implementation point to improve is programme clarity in terms of the role of being a  
40 facilitator on the one hand, and links with the broader PRALIMAP-INÈS programme on the  
41 other. For example, the selection of receivers was perceived as unclear and nearly half of the  
42 facilitators spontaneously mentioned this lack of understanding at the end of the peer  
43 intervention despite it being mentioned during the training session. This reflects a gap in the  
44 perception of intervention necessity as acknowledged by a professional as opposed to the  
45 facilitators.

46  
47 A related point of confusion is the link between the peer intervention and the wider PRALIMAP-  
48 INÈS programme. For example, several facilitators thought that through the peer intervention  
49 they would gain nutritional knowledge indirectly. Some also described the peer intervention as  
50 not really part of the wider programme, which was likely perceived as more formal as it was  
51 delivered by health professionals and with a clearer educational focus. Furthermore, several  
52 admitted that although they were happy being a facilitator, they would probably not have  
53 accepted being a receiver.

54  
55 The training session specifically did not provide nutritional information to facilitators as this  
56 information was imparted directly to participating adolescents, who were also the potential  
57

1  
2  
3 receivers, throughout the rest of the PRALIMAP-INÈS programme. Nevertheless, some  
4 facilitators took the initiative of talking about nutrition with their receivers and others, on the  
5 contrary, did not consider it to be part of their role. This point merits further specification  
6 during the training session.

### 7 8 *Health problems*

9 Another unexpected finding was the number of health problems experienced by the facilitators.  
10 All but 2 facilitators reported small health problems throughout the year, sometimes with the  
11 consequence of having to delay or re-plan an activity. For 4 facilitators, the health problems  
12 were significant enough to have to either completely give up on their role as a facilitator, or rule  
13 out a large range of activities. For example: tendinitis stopped one facilitator from doing any  
14 physical activity for several months, one potential facilitator did not continue after the training  
15 session since she had to undergo a double knee surgery, one facilitator had a severe epilepsy  
16 attack so was cautioned against physical activity and one had to quit following an ice-skating  
17 accident.

### 18 19 *Interpersonal skills*

20 In terms of specific difficulties, it is clear that one facilitator in middle school had great difficulty  
21 with the role, not feeling comfortable especially in terms of social relations: she asked to change  
22 her receiver because she was afraid he had feelings for her and then asked to be able to carry  
23 out the activity with her own friends as well. In general, interpersonal skills were a common  
24 issue and this finding suggests more specific training in interpersonal skills may be necessary.

25  
26 Another unforeseen difficulty linked to the social context of the intervention was having several  
27 facilitators in the same school. This had initially been considered to be a motivating factor and  
28 was initially perceived as such by the facilitators concerned. However, in practice this  
29 complicated further the organizational task and actually delayed several activities being  
30 organized which impacted the motivation of some facilitators.

### 31 32 *Good practice*

33  
34 In general and consistent with the implementation challenges identified above, supporting  
35 elements for successfully carrying out the role of facilitator, and evidenced principally in the  
36 telephone notes, were being proactive and having lots of ideas, having free time and living close  
37 to the receivers.

38  
39 Furthermore, several programme components seemed to facilitate implementation. In general,  
40 contact between the programme coordinator and the facilitators was perceived as very positive.  
41 Adolescents appreciated the procedure of first sending an SMS in order to agree on a time for a  
42 call, even though this was quite time consuming (see Table 3). The phone calls were very clearly  
43 experienced as motivating for all facilitators, whether they had been successful in their tasks or  
44 not. Overall, it can be stated that communicating via SMS is appreciated by adolescents, both  
45 with the coordinator but also with the receivers. It is however important to acknowledge the  
46 fact that the adolescents, even the most reliable ones, can be unreachable for various reasons. It  
47 was therefore essential to have several means of contacting them. An additional possibility  
48 would be for the coordinator to contact the schools directly when there seems to be a  
49 communication problem.

50 When supportive of the programme, schools can be an important facilitating component to  
51 implementation. For example, some schools successfully organized the meeting between  
52 facilitators and potential receivers and one school nurse helped with selecting a receiver for a  
53 facilitator for whom previous contact with receivers had been unsuccessful.

54  
55 A mixed finding was the support of parents. Although some facilitators seemed to share very  
56 little of their facilitator activities with their parents, despite sometimes being very successful,  
57

1  
2  
3 for others their parents were clearly very supportive and for three facilitators, parents had an  
4 active role in the implementation of the activities.

5  
6 For ambassadors, a consistent finding is that they agreed to become facilitators because they  
7 liked participating in the PRALIMAP-INÈS programme the previous year. For all facilitators, it is  
8 clear that once they agreed to continue beyond the initial training session, they were motivated  
9 and committed to the PRALIMAP-INÈS programme in general, they actively and informally  
10 promoted the programme to family, peers and friends, without this being specified in their role.

### 11 Receiver views

12  
13 Of the 6 potential receivers interviewed, 2 had carried out an activity of which 1 girl and 1 boy.  
14 Two girls can be considered passive receivers as they say they would have participated but  
15 don't remember being offered any activities by a facilitator and the 2 boys can be considered  
16 reluctant receivers as they clearly expressed their misgiving regarding the peer intervention.  
17 The most illustrative quotes from the different types of material analysed are presented in  
18 Supplementary file 4.

### 19 Social environment

20  
21 It can be noted that family problems were very frequently reported amongst the receivers and  
22 some seemed to have important household responsibilities. In terms of the broader  
23 environment in high school, views were mixed. Boys generally said they appreciated the school  
24 environment, especially those who were full boarders, but girls seemed less at ease. To a large  
25 extent, the appreciation of the school environment depended on the relationship with peers. For  
26 all adolescents, peers are important in order to laugh, talk and relax. However, a distinction is  
27 made about what is a real friend, which entails the crucial element of trust and being able to  
28 count on the person. What is very present in the description of friendship for all of the  
29 adolescents is the notion of proximity in terms of being in the same place and seeing each other  
30 frequently. This notion of proximity means that for the majority, they seem closer to their new  
31 friends in high school than their childhood friends. For some, age proximity is also important

32  
33 In terms of number of friends, adolescent profiles were quite different. Two adolescents, a boy  
34 and a girl, were clearly very sociable and reported a large group of real friends. The others,  
35 including both active receivers, admitted having few close friends. Two reported just staying  
36 with a preferred best friend and the other two described a small group of 2-4 friends. For the  
37 majority, there seemed to be a general mistrust of peers and feeling of isolation. Some  
38 adolescents attributed their feeling of social exclusion to their overweight status.

### 39 Health and overweight

40  
41 For the majority of adolescents, health was defined as the absence of disease but also feeling in  
42 good shape. Public health norms of healthy eating and exercising were also understood and  
43 commonly mentioned. Interestingly, for two boys, health also included not being overweight.

44  
45 For the majority of adolescents, being overweight was principally defined by referring to  
46 physical appearance and was directly linked to not feeling good about oneself. In fact, all but one  
47 adolescent interviewed expressed wanting to lose weight and reported attempts in that  
48 direction, even if this was mentioned indirectly.

49  
50 However, many expressed that healthy behaviour was difficult and this was particularly well  
51 illustrated by the fact that all adolescents but one reported that they frequently ate in a fast food  
52 restaurant. It is also noticeable that what was particularly experienced as difficult was  
53 controlling what one eats. However, physical activity seemed to be something that was

1  
2  
3 appreciated by the majority of adolescents.

#### 4 *Programme experience*

5  
6 The two adolescents who were active receivers were also those who enjoyed the wider  
7 PRALIMAP-INÈS programme. They found it fun and felt they were given good advice and that it  
8 was helpful for behaviour change. The others went to at least one activity to try it but did not  
9 really understand the programme and found it uninteresting.

10  
11 Similarly to the facilitators, there was an overall lack of clarity as regards the peer intervention.  
12 In fact, 3 receivers did not remember being contacted for a peer intervention. Interestingly, not  
13 knowing the facilitator in advance only seemed to be a problem for 2 of the adolescents  
14 interviewed, one of whom was actually an active receiver. It seems that the others would have  
15 been quite open to the peer activities had they understood what it entailed. Only one adolescent  
16 boy was firmly against the peer intervention but could not explain why.

17  
18 The receivers that had benefited from a nutritional activity with a facilitator expressed enjoying  
19 the activities, especially the social component for the receiver who did not know the facilitator  
20 beforehand. In fact, it is interesting that the relationship continued beyond the peer  
21 intervention.

## 22 **DISCUSSION**

### 23 **Main results**

24  
25 The intervention was successfully implemented with a sufficient number of participants, both  
26 facilitators and receivers, in order to provide recommendation as to the feasibility of the  
27 intervention in terms of demand, acceptability, implementation and practicality. Noteworthy  
28 results are, first, that acceptance of receivers was more likely when asked by a peer compared  
29 to a professional. Furthermore, facilitators found it very difficult to implement nutritional  
30 activities and required intense support by the intervention coordinator both by SMS and phone  
31 calls. The activities were mostly based on physical activity and implemented outside of the  
32 school week. Key implementation challenges for facilitators were lack of time, timetable clashes,  
33 transport problems, contact issues with the intervention coordinator and the receivers, health  
34 problems, need for support to maintain motivation and motivate receivers as well as a need for  
35 increased programme clarity. Interviews with the receivers further revealed, for the majority,  
36 family problems, few friends and a general distrust of peers. Furthermore, most felt bad about  
37 their appearance and would have liked to lose weight. Those who participated in peer activities  
38 were very positive about the experience especially in terms of social interaction and the  
39 development of new relations. For both facilitators and active receivers there were more  
40 participating girls.

### 41 **Demand and Acceptability**

42  
43 A specific difficulty identified by a review of interventions for the prevention of obesity in  
44 adolescents was targeting interventions to a heterogeneous group[40] and it has previously  
45 been shown that even though adolescents generally want to be more active, there is much intra-  
46 individual variation in what, where, when and with whom, suggesting that tailored activity  
47 promotion would be ideal[41]. The wide range of profiles of the receivers in the present study  
48 are in line with this finding and highlights the potential advantage of implementing nutritional  
49 activities in peer dyads. Generally, although it can be said that the school setting allows all  
50 adolescents to be reached by health interventions equally, it is noteworthy that none of the peer  
51 nutritional activities were carried out in the school and the results of the interviews with the  
52 receivers confirm that for many, the school context is not favourable to feeling at ease given the  
53 general mistrust of peers. This result suggests that health programmes taking place in the  
54 school setting could use a peer intervention component to reach adolescents which may not  
55  
56  
57



1  
2  
3 otherwise participate on the school premises. The opportunity of reaching otherwise hard-to-  
4 reach adolescents with a peer intervention is also supported by the finding that the receivers  
5 who accepted the peer intervention had a higher BMI on average than those who refused.  
6 Furthermore, all of the interviews carried out with receivers confirm that these adolescents  
7 wish to lose weight but find it difficult. It therefore seems that there is a real added-value to  
8 peer interventions aimed at overweight adolescents of low socioeconomic status.  
9

10 The acceptance rate of the receivers seems sufficiently high to suggest satisfactory demand and  
11 acceptability of the programme, especially since they were more readily convinced to  
12 participate in the intervention when it was offered by a peer as opposed to a health  
13 professional. However, the acceptance rate and reach of the peer intervention could certainly be  
14 greatly improved in several ways. An unexpected finding was the widespread mistrust of peers  
15 in general. In fact, Puhl and colleagues[42] found that although peers were generally sought  
16 agents for support relative to parents, teachers or health professionals, they were also those  
17 who aroused most uncertainty with nearly a quarter of adolescents unsure if they wanted their  
18 peers to intervene. Given the general mistrust of same age peers of the receivers on the one  
19 hand, and the difficulty of the facilitators to contact the receivers on the other, a key  
20 improvement point would be for the coordinator to organise a joint meeting between the  
21 facilitators and receivers shortly after them having accepted the intervention. This would also  
22 be an opportunity to clarify what the peer intervention entails and the links with the broader  
23 health programme and perhaps even plan together the first activity for the receiver and  
24 facilitator to carry out. Another improvement point which concerns both the receivers and  
25 facilitators is to multiply the contact modes available to reach them, ideally also liaising with the  
26 school for this to be possible.  
27

28 In their synthesis of reviews, Khambalia and colleagues[1] recommend individualizing  
29 interventions to particular student characteristics, particularly with regard to gender. Similar to  
30 other interventions, the present study had a gender bias in terms of peer interveners. The  
31 difficulty in encouraging boys to volunteer has widely been acknowledged[6,43,44]. More  
32 research needs to be carried out in order to understand how to specifically engage boys in  
33 health interventions in general.  
34

### 35 **Implementation and Practicality**

36 The results of the present study point to several improvements that could enhance the  
37 feasibility of a peer intervention based on the implementation of nutritional activities among  
38 less advantaged adolescents. In terms of the facilitators, contrary to expectations, it seems that  
39 entrepreneurs seem a better target than ambassadors. Indeed, although younger and less easily  
40 convinced to take on the role initially (69% refusal rate), they were by far the most successful  
41 facilitators. One reason could be that ambassadors have more academic pressure, being a year  
42 above and having state exams at the end of the year, which was not the case of the  
43 entrepreneurs. In France, students have national exams in 3ème (grade 9), the last year of  
44 middle-school when adolescents are 14-15, but then also in the last two years of high school  
45 when adolescents are 16 to 18 (grades 11 and 12). An inherent problem with the school setting  
46 is that, although health topics and transferable skill development are considered important  
47 cross-curricular themes, health and education agendas are often in competition with priority  
48 being given to core subjects[3,6,45,46]. A running question amongst peer education  
49 implemented in schools is the compatibility with students school commitments, especially  
50 national exams[46,47]. Furthermore, the entrepreneurs seemed generally to be in better health,  
51 which is conducive to finding energy for the role of facilitator and being a positive role model.  
52

53 The dose of support received by the facilitators throughout the school year seems appropriate  
54 but results of this study suggest facilitators may need longer than a 2-hour training session,  
55 even if they are not expected to transmit nutritional information. The training session would  
56 particularly benefit from three additions. First, increased time spent clarifying the role of the  
57  
58  
59

1  
2  
3 facilitator and the link with the broader health programme seems necessary. Second, it seems  
4 important to give facilitators practical ideas based on the local facilities which should have been  
5 previously contacted so that the facilitators can reach a contact person for these activities if they  
6 are interested. Third, it may be important to provide specific training of interpersonal skills. The  
7 idea of providing more specific skills training for social support has been previously  
8 reported[20].  
9

10 The main improvement point is to facilitate the implementation of activities for the facilitators.  
11 Generally, our findings concur with the two main types of time-constraints highlighted in other  
12 peer-led programmes: constraints linked to the implementation setting such as, for the school  
13 setting, exams or internships and constraints linked to the peers themselves such as family  
14 obligations, different timetables or residence location[6]. Constraints due to the peers  
15 themselves may be even more significant when working with less advantaged adolescents, as  
16 can be illustrated by the many family problems revealed during the interviews with receivers. It  
17 seems that the main logistical modification that can be made is to match facilitators and  
18 receivers based on place of residence. This is especially true since most activities were carried  
19 out outside of the school week. Although the school environment has many advantages, it has  
20 been noted that some facilities may not be readily available for nutrition-based activities such as  
21 facilities for food preparation and consumption[48]. This was also noted in the current study.  
22 The initial assumption that peer facilitators would be able to use school facilities was never put  
23 into practice. One main reason may explain this finding on top of the lack of facilities: the  
24 organisational burden in order to use the facilities. Another reason could be the strict health and  
25 safety regulations of the school setting. An additional advantage of implementing a peer  
26 intervention programme is the fact that if the adolescents live close enough, their activities can  
27 continue during the holidays. The summer holidays have been highlighted as a potentially  
28 important period of weight gain for adolescents, especially for overweight children and  
29 adolescents and ethnic minority groups[49].  
30

31 Another recommendation would be to encourage carrying out, at least at first, activities based  
32 on physical activity rather than healthy eating as this has the most potential to engage  
33 adolescents and activities in dyads rather than groups, since this is easier to organize. Although  
34 allowing people to be with their friends in order to engage in physical activity has been  
35 recognised as a key lever for behaviour change[41], in practice it is difficult to create meaningful  
36 peer relations. In fact, although the peer-led activities were originally conceived as group  
37 activities, in practice peer interveners were only able to implement nutrition activities in pairs.  
38 This could be due to timetable clashes but also perhaps the fact that with unfamiliar peers it is  
39 easier to gain each other's trust in pairs.  
40

### 41 **Strengths and limitations**

42 Although some interventions have previously used peer education to specifically target  
43 disadvantaged children and adolescents[50], to our knowledge this is the first intervention to  
44 purposefully select peer facilitators based on socioeconomic status. The peer intervention was  
45 embedded in a large-scale research study which allowed systematic collection of data in all state  
46 run high schools in the Vosges area in France as well as some volunteer middle schools totalling  
47 33 schools. This allows conclusions to be drawn about selection procedures of facilitators and  
48 receivers as well as the acceptability of the peer intervention. Furthermore, an in-depth process  
49 analysis with different sources of qualitative material was carried out in order to triangulate  
50 findings and inform practice as to the feasibility of the peer intervention. Limits of the present  
51 study relate to the small sample sizes of the facilitators and receivers. As a result, no statistical  
52 conclusions can be drawn with confidence as regards, first, the characteristics of the  
53 participants and, second, the impact of the peer intervention on the nutritional behaviour of the  
54 receivers. However, the peer intervention was purposefully designed as a feasibility study given  
55 the innovative selection of facilitators. With a larger sample size, further research should aim to  
56 measure the health benefits to the receivers and the cost of the intervention. It would also be  
57  
58  
59

important to empirically establish the added value of selecting peer facilitators matched on receiver socioeconomic status. Furthermore, the benefits of selecting less advantaged facilitators should also be assessed as regards the potential empowerment of more vulnerable adolescents by encouraging them to take an active part in health programmes.

## Contributors

LS conceived and coordinated the intervention. SB, KL, JL, LM, AYO, RdL and EL participated in the intervention design and implementation. JK participated in the conception of the focus groups and interviews. LS and SR conducted focus groups and interviews and LS conducted qualitative analyses. LS and SB conceived and drafted the manuscript with input from all members of the authorship team. SB coordinated the overall study. CA performed quantitative analyses. KL, CA, SR, JL, LM, AYO, RdL, JK and EL also reviewed the manuscript and contributed important intellectual content. All authors approve the final manuscript. Members of the PRALIMAP-INÈS trial group (PI) contributed by giving feedback during intervention implementation.

## Acknowledgements

Many people worked together to make a success of the PRALIMAP-INÈS trial and have been listed in the design, methods, and rationale paper. We would like to express our gratitude to the participating students, parents, and professionals in the participating schools.

## Funding statement

This work was supported by the French National Cancer Institute (INCA), a public institute, grant number 2011-239. The work of LS was supported by the University of Lorraine (PhD grant).

## Competing interests

We have read and understood BMJ policy on declaration of interests and declare that we have no competing interests.

## Patient consent

Obtained

## Ethics approval

As an integral part of the PRALIMAP-INÈS trial (registered at ClinicalTrials.gov NCT01688453), ethics approval was obtained from the French consultative committee for treatment of information in health and research (no. 12.299), the French national commission for Data Protection and Liberties (no. 912372) and the French Persons Protection Committee (no. 2012/15).

## Data sharing statement

No additional data are available

## Figure legends

Figure 1: Recruitment process of the facilitators (ambassadors and entrepreneurs)

Figure 2: Interest and participation of the receivers

## References

- 1 Khambalia AZ, Dickinson S, Hardy LL, *et al.* A synthesis of existing systematic reviews and meta-analyses of school-based behavioural interventions for controlling and preventing obesity. *Obes Rev* 2012;**13**:214–233. doi:10.1111/j.1467-789X.2011.00947.x
- 2 Ayliffe B, Glanville NT. Achieving healthy body weight in teenagers: evidence-based practice guidelines for community nutrition interventions. *Can J Diet Pract Res Publ Dietit Can Rev Can Prat Rech En Diet Une Publ Diet Can* 2010;**71**:e78-86.
- 3 Langford R, Bonell C, Jones H, *et al.* The World Health Organization's Health Promoting Schools framework: a Cochrane systematic review and meta-analysis. *Bmc Public Health* 2015;**15**:130. doi:10.1186/s12889-015-1360-y
- 4 Amini M, Djazayeri A, Majdzadeh R, *et al.* Effect of School-based Interventions to Control Childhood Obesity: A Review of Reviews. *Int J Prev Med* 2015;**6**:68. doi:10.4103/2008-7802.162059
- 5 Lee H, Harris KM, Lee J. Multiple Levels of Social Disadvantage and Links to Obesity in Adolescence and Young Adulthood. *J Sch Health* 2013;**83**:139–149. doi:10.1111/josh.12009
- 6 Le Grand E. « ESPAIR » Rapport d'évaluation. Paris: : Ministère des Sports, de la Jeunesse, de l'Education populaire et de la Vie associative Fonds d'Expérimentation pour la Jeunesse 2012.
- 7 Roseman MG, Riddell MC, Haynes JN. A content analysis of kindergarten-12th grade school-based nutrition interventions: taking advantage of past learning. *J Nutr Educ Behav* 2011;**43**:2–18. doi:10.1016/j.jneb.2010.07.009
- 8 Amsellem-Mainguy Y. Qu'entend-on par « éducation pour la santé par les pairs » ? *Cah L'action* 2016;**9**–16.
- 9 Langlois J, Omorou AY, Vuillemin A, *et al.* Association of socioeconomic, school-related and family factors and physical activity and sedentary behaviour among adolescents: multilevel analysis of the PRALIMAP trial inclusion data. *BMC Public Health* 2017;**17**:175. doi:10.1186/s12889-017-4070-9
- 10 Sawka KJ, McCormack GR, Nettel-Aguirre A, *et al.* Friendship networks and physical activity and sedentary behavior among youth: a systematized review. *Int J Behav Nutr Phys Act* 2013;**10**:130. doi:10.1186/1479-5868-10-130
- 11 Salvy S-J, de la Haye K, Bowker JC, *et al.* Influence of peers and friends on children's and adolescents' eating and activity behaviors. *Physiol Behav* 2012;**106**:369–78. doi:10.1016/j.physbeh.2012.03.022
- 12 Abdi F, Simbar M. The Peer Education Approach in Adolescents- Narrative Review Article. *Iran J Public Health* 2013;**42**:1200–6.
- 13 Azizi M, Hamzehgardeshi Z, Shahhosseini Z. Influential Factors for the Improvement of Peer Education in Adolescents: A Narrative Review. *J Pediatr Rev* 2017;**5**:e7692. doi:10.17795/jpr-7692

- 1
- 2
- 3 14 Villa-Torres L, Svanemyr J. Ensuring Youth's Right to Participation and Promotion of Youth
- 4 Leadership in the Development of Sexual and Reproductive Health Policies and Programs. *J*
- 5 *Adolesc Health* 2015;**56**:S51–7. doi:10.1016/j.jadohealth.2014.07.022
- 6
- 7 15 Ayaz S, Acil D. Comparison of Peer Education and the Classic Training Method for School Aged
- 8 Children Regarding Smoking and its Dangers. *J Pediatr Nurs-Nurs Care Child Fam* 2015;**30**:E3–12.
- 9 doi:10.1016/j.pedn.2014.11.009
- 10
- 11 16 MacArthur GJ, Harrison S, Caldwell DM, *et al*. Peer-led interventions to prevent tobacco, alcohol
- 12 and/or drug use among young people aged 11–21years: a systematic review and meta-analysis.
- 13 *Addiction* 2016;**111**:391–407. doi:10.1111/add.13224
- 14
- 15 17 Cui Z, Shah S, Yan L, *et al*. Effect of a school-based peer education intervention on physical
- 16 activity and sedentary behaviour in Chinese adolescents: a pilot study. *BMJ Open*
- 17 2012;**2**:e000721. doi:10.1136/bmjopen-2011-000721
- 18
- 19 18 El Rayess F, Gandhi M, Mennillo H. Mark, Set, Go! School-Based Nutrition and Physical Activity
- 20 Program: A Five-Year Evaluation. *R I Med J* 2013 2017;**100**:39–44.
- 21
- 22 19 Ishak SIZS, Chin YS, Taib MNM, *et al*. School-based intervention to prevent overweight and
- 23 disordered eating in secondary school Malaysian adolescents: a study protocol. *Bmc Public*
- 24 *Health* 2016;**16**:1101. doi:10.1186/s12889-016-3773-7
- 25
- 26 20 Kulik NL, Fisher EB, Ward DS, *et al*. Peer support enhanced social support in adolescent females
- 27 during weight loss. *Am J Health Behav* 2014;**38**:789–800. doi:10.5993/AJHB.38.5.16
- 28
- 29 21 Lloyd-Richardson EE, Jelalian E, Sato AF, *et al*. Two-year follow-up of an adolescent behavioral
- 30 weight control intervention. *Pediatrics* 2012;**130**:e281–288. doi:10.1542/peds.2011-3283
- 31
- 32 22 McKinney C, Bishop V, Cabrera K, *et al*. NuFit: nutrition and fitness CBPR program evaluation. *J*
- 33 *Prev Interv Community* 2014;**42**:112–24. doi:10.1080/10852352.2014.881180
- 34
- 35 23 Santos RG, Durksen A, Rabbanni R, *et al*. Effectiveness of peer-based healthy living lesson plans
- 36 on anthropometric measures and physical activity in elementary school students: a cluster
- 37 randomized trial. *JAMA Pediatr* 2014;**168**:330–7. doi:10.1001/jamapediatrics.2013.3688
- 38
- 39 24 Ladapo JA, Bogart LM, Klein DJ, *et al*. Cost and Cost-Effectiveness of Students for Nutrition and
- 40 eExercise (SNaX). *Acad Pediatr* 2016;**16**:247–53. doi:10.1016/j.acap.2015.07.009
- 41
- 42 25 Chandra-Mouli V, Lane C, Wong S. What Does Not Work in Adolescent Sexual and Reproductive
- 43 Health: A Review of Evidence on Interventions Commonly Accepted as Best Practices. *Glob*
- 44 *Health-Sci Pract* 2015;**3**:333–40. doi:10.9745/GHSP-D-15-00126
- 45
- 46 26 Harden A, Oakley A, Oliver S. Peer-delivered health promotion for young people: A systematic
- 47 review of different study designs. *Health Educ J* 2001;**60**:339–53.
- 48 doi:10.1177/001789690106000406
- 49
- 50 27 Bandura A. *Social Foundations of Thought & Action, a Social Cognitive Theory*. First Printing
- 51 edition. Prentice Hall 1986.
- 52
- 53 28 Bagnall A-M, South J, Hulme C, *et al*. A systematic review of the effectiveness and cost-
- 54 effectiveness of peer education and peer support in prisons. *BMC Public Health* 2015;**15**:290.
- 55 doi:10.1186/s12889-015-1584-x
- 56
- 57
- 58
- 59
- 60

- 1  
2  
3 29 Crosnoe R, Muller C. Body mass index, academic achievement, and school context: examining  
4 the educational experiences of adolescents at risk of obesity. *J Health Soc Behav* 2004;**45**:393–  
5 407. doi:10.1177/002214650404500403  
6  
7 30 Bowen DJ, Kreuter M, Spring B, *et al.* How We Design Feasibility Studies. *Am J Prev Med*  
8 2009;**36**:452–7. doi:10.1016/j.amepre.2009.02.002  
9  
10 31 Legrand K, Lecomte E, Langlois J, *et al.* Reducing social inequalities in access to overweight and  
11 obesity care management for adolescents: The PRALIMAP-INÈS trial protocol and inclusion data  
12 analysis. *Contemp Clin Trials Commun* 2017;**7**:141–57. doi:10.1016/j.conctc.2017.05.010  
13  
14 32 Cole TJ, Bellizzi MC, Flegal KM, *et al.* Establishing a standard definition for child overweight and  
15 obesity worldwide: international survey. *Br Med J* 2000;**320**:1240–3.  
16 doi:10.1136/bmj.320.7244.1240  
17  
18 33 Currie CE, Elton RA, Todd J, *et al.* Indicators of socioeconomic status for adolescents: the WHO  
19 Health Behaviour in School-aged Children Survey. *Health Educ Res* 1997;**12**:385–97.  
20 doi:10.1093/her/12.3.385  
21  
22 34 Boyce W, Torsheim T, Currie C, *et al.* The Family Affluence Scale as a Measure of National  
23 Wealth: Validation of an Adolescent Self-Report Measure. *Soc Indic Res* 2006;**78**:473–87.  
24 doi:10.1007/s11205-005-1607-6  
25  
26 35 Craig CL, Marshall AL, Sjöström M, *et al.* International physical activity questionnaire: 12-country  
27 reliability and validity. *Med Sci Sports Exerc* 2003;**35**:1381–95.  
28 doi:10.1249/01.MSS.0000078924.61453.FB  
29  
30 36 Garner DM, Garfinkel PE. The Eating Attitudes Test: an index of the symptoms of anorexia  
31 nervosa. *Psychol Med* 1979;**9**:273–9.  
32  
33 37 Haines J, Ziyadeh NJ, Franko DL, *et al.* Screening high school students for eating disorders:  
34 validity of brief behavioral and attitudinal measures. *J Sch Health* 2011;**81**:530–5.  
35 doi:10.1111/j.1746-1561.2011.00623.x  
36  
37 38 Zigmond AS, Snaith RP. The hospital anxiety and depression scale. *Acta Psychiatr Scand*  
38 1983;**67**:361–70.  
39  
40 39 Ravens-Sieberer U, Erhart M, Rajmil L, *et al.* Reliability, construct and criterion validity of the  
41 KIDSCREEN-10 score: a short measure for children and adolescents' well-being and health-  
42 related quality of life. *Qual Life Res Int J Qual Life Asp Treat Care Rehabil* 2010;**19**:1487–500.  
43 doi:10.1007/s11136-010-9706-5  
44  
45 40 Doak CM, Visscher TLS, Renders CM, *et al.* The prevention of overweight and obesity in children  
46 and adolescents: a review of interventions and programmes. *Obes Rev* 2006;**7**:111–136.  
47 doi:10.1111/j.1467-789X.2006.00234.x  
48  
49 41 Corder K, Schiff A, Kesten JM, *et al.* Development of a universal approach to increase physical  
50 activity among adolescents: The GoActive Intervention. Published Online First: 25 August 2015.  
51 doi:http://dx.doi.org/10.1136/bmjopen-2015-008610  
52  
53 42 Puhl RM, Peterson JL, Luedicke J. Strategies to address weight-based victimization: youths'  
54 preferred support interventions from classmates, teachers, and parents. *J Youth Adolesc*  
55 2013;**42**:315–27. doi:10.1007/s10964-012-9849-5  
56  
57  
58  
59

- 1  
2  
3 43 Grand ÉL. Professionnaliser les pairs-éducateurs est-il nécessaire ? *Cah L'action* 2016;:75–82.  
4  
5 44 Strange V, Forrest S, Oakley A. Peer-led sex education—characteristics of peer educators and  
6 their perceptions of the impact on them of participation in a peer education programme. *Health*  
7 *Educ Res* 2002;**17**:327–37. doi:10.1093/her/17.3.327  
8  
9 45 Langford R, Bonell C, Jones H, *et al.* Obesity prevention and the Health promoting Schools  
10 framework: essential components and barriers to success. *Int J Behav Nutr Phys Act* 2015;**12**:15.  
11 doi:10.1186/s12966-015-0167-7  
12  
13 46 Audrey S, Holliday J, Campbell R. Commitment and compatibility: Teachers' perspectives on the  
14 implementation of an effective school-based, peer-led smoking intervention. *Health Educ J*  
15 2008;**67**:74–90. doi:10.1177/0017896908089387  
16  
17 47 Corder K, Brown HE, Schiff A, *et al.* Feasibility study and pilot cluster-randomised controlled trial  
18 of the GoActive intervention aiming to promote physical activity among adolescents: outcomes  
19 and lessons learnt. *Bmj Open* 2016;**6**:e012335. doi:10.1136/bmjopen-2016-012335  
20  
21 48 Bell SL, Audrey S, Cooper AR, *et al.* Lessons from a peer-led obesity prevention programme in  
22 English schools. *Health Promot Int* 2014;:dau008. doi:10.1093/heapro/dau008  
23  
24 49 Franckle R, Adler R, Davison K. Accelerated weight gain among children during summer versus  
25 school year and related racial/ethnic disparities: a systematic review. *Prev Chronic Dis*  
26 2014;**11**:E101. doi:10.5888/pcd11.130355  
27  
28 50 Lubans DR, Morgan PJ, Aguiar EJ, *et al.* Randomized controlled trial of the Physical Activity  
29 Leaders (PALs) program for adolescent boys from disadvantaged secondary schools. *Prev Med*  
30 2011;**52**:239–46. doi:10.1016/j.ypmed.2011.01.009  
31  
32  
33  
34  
35  
36  
37  
38  
39  
40  
41  
42  
43  
44  
45  
46  
47  
48  
49  
50  
51  
52  
53  
54  
55  
56  
57  
58  
59  
60

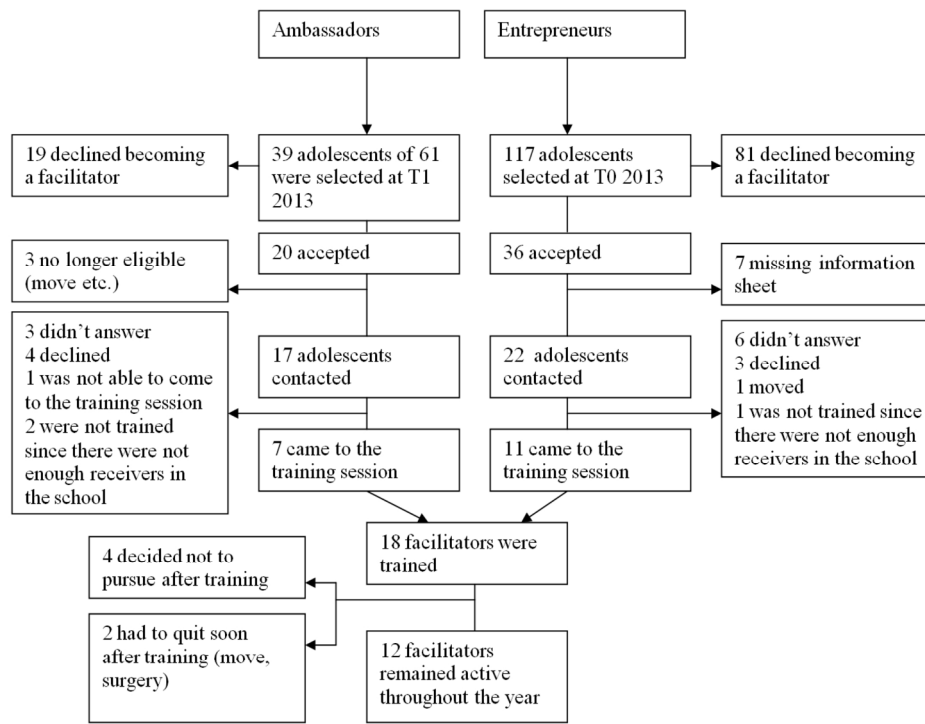

Figure 1: Recruitment process of the facilitators (ambassadors and entrepreneurs)

199x156mm (300 x 300 DPI)



1  
2  
3  
4  
5  
6  
7  
8  
9  
10  
11  
12  
13  
14  
15  
16  
17  
18  
19  
20  
21  
22  
23  
24  
25  
26  
27  
28  
29  
30  
31  
32  
33  
34  
35  
36  
37  
38  
39  
40  
41  
42  
43  
44  
45  
46  
47  
48  
49  
50  
51  
52  
53  
54  
55  
56  
57  
58  
59  
60

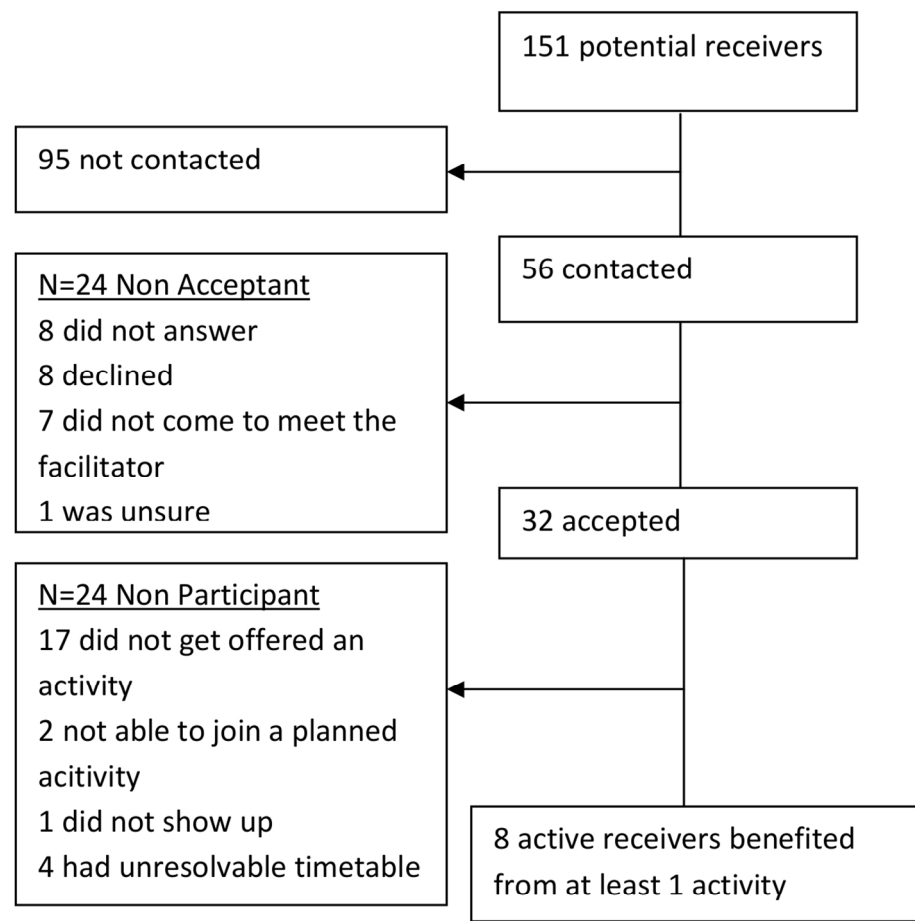

Figure 2: Interest and participation of the receivers

120x125mm (300 x 300 DPI)

Supplementary file 1: Contribution of each source of data collection to assess feasibility questions

| Feasibility criteria | Outcomes of interest              | Screening session | Facilitator training session | Facilitator mid-program interview | Facilitator end-of-program session | Facilitator SMS exchanges | Facilitator Telephone calls | Nutritional activities | Receiver individual interviews |
|----------------------|-----------------------------------|-------------------|------------------------------|-----------------------------------|------------------------------------|---------------------------|-----------------------------|------------------------|--------------------------------|
| Demand               | Expressed interest                | x                 |                              |                                   |                                    |                           |                             |                        | x                              |
|                      | Characteristics                   | x                 |                              |                                   |                                    |                           |                             |                        | x                              |
|                      | Participation                     |                   | x                            |                                   |                                    | x                         | x                           | x                      |                                |
| Acceptability        | Appropriateness                   |                   | x                            | x                                 | x                                  | x                         | x                           |                        | x                              |
|                      | Satisfaction                      |                   | x                            | x                                 | x                                  |                           |                             |                        | x                              |
| Implementation       | Intervention dose                 |                   |                              |                                   |                                    |                           |                             | x                      |                                |
|                      | Support needed                    |                   |                              |                                   |                                    | x                         | x                           |                        |                                |
| Practicality         | Implementation ease or difficulty |                   | x                            | x                                 | x                                  | x                         | x                           |                        | x                              |

1  
2  
3  
4  
5  
6  
7  
8  
9  
10  
11  
12  
13  
14  
15  
16  
17  
18  
19  
20  
21  
22  
23  
24  
25  
26  
27  
28  
29  
30  
31  
32  
33  
34  
35  
36  
37  
38  
39  
40  
41  
42  
43  
44  
45  
46

Supplementary file 2: individual characteristics of each facilitator and receiver

|                         | Entrepreneur                          |                                       |                          |                          |               |                                       |               | Ambassadors              |                                       |                          |                          |                          | Active receiver                       |                          |                          |                          |                          |                                       |                          |               |
|-------------------------|---------------------------------------|---------------------------------------|--------------------------|--------------------------|---------------|---------------------------------------|---------------|--------------------------|---------------------------------------|--------------------------|--------------------------|--------------------------|---------------------------------------|--------------------------|--------------------------|--------------------------|--------------------------|---------------------------------------|--------------------------|---------------|
| Student number          | 61142                                 | 61177                                 | 101052                   | 141026                   | 151039        | 191099                                | 241026        | 50011                    | 70016                                 | 150016                   | 210005                   | 210012                   | 61147                                 | 141052                   | 141058                   | 151098                   | 151116                   | 191134                                | 211001                   | 241089        |
| Measurement time point  | T0                                    | T0                                    | T0                       | T0                       | T0            | T0                                    | T0            | T1                       | T1                                    | T1                       | T1                       | T1                       | T0                                    | T0                       | T0                       | T0                       | T0                       | T0                                    | T0                       | T0            |
| Gender                  | Girl                                  | Girl                                  | Girl                     | Boy                      | Boy           | Girl                                  | Girl          | Girl                     | Boy                                   | Boy                      | Girl                     | Girl                     | Girl                                  | Boy                      | Boy                      | Boy                      | Girl                     | Girl                                  | Girl                     | Girl          |
| School type             | General and technological High School | General and technological High School | Professional High School | Professional High School | Middle School | General and technological High School | Middle School | Professional High School | General and technological High School | Professional High School | Professional High School | Professional High School | General and technological High School | Professional High School | Professional High School | Professional High School | Professional High School | General and technological High School | Professional High School | Middle School |
| Exact age               | 15.04                                 | 15.39                                 | 15.94                    | 16.54                    | 13.97         | 15.02                                 | 13.99         | 16.38                    | 15.44                                 | 16.15                    | 16.23                    | 15.77                    | 15.62                                 | 16.58                    | 16.12                    | 17.55                    | 17.41                    | 14.90                                 | 15.87                    | 14.22         |
| BMI                     | 22.49                                 | 19.04                                 | 23.07                    | 25.92                    | 20.06         | 24.31                                 | 21.55         | 27.17                    | 23.70                                 | 27.75                    | 28.98                    | 27.43                    | 23.76                                 | 32.97                    | 25.73                    | 28.99                    | 37.42                    | 24.30                                 | 25.83                    | 31.68         |
| FAS score               | 5                                     | 5                                     | 3                        | 4                        | 3             | 4                                     | 4             | 4                        | 5                                     | 5                        | 5                        | 4                        | 5                                     | 4                        | 2                        | 5                        | 5                        | 4                                     | 4                        | 5             |
| EAT 26 score            | 3.8                                   | 8                                     | 7.6                      | 8.3                      | .             | 12.8                                  | .             | 8.9                      | 15.3                                  | 6.4                      | 29.3                     | 7.6                      | 35.8                                  | 15.3                     | 11.5                     | 2.5                      | 10.2                     | 17.9                                  | 8.9                      | 14.1          |
| HAD score               | 28.57                                 | 9.52                                  | 14.29                    | 14.29                    | 9.52          | 38.10                                 | 11.90         | 19.05                    | 26.19                                 | 16.67                    | 35.71                    | 28.57                    | 42.86                                 | 35.71                    | 35.71                    | 26.19                    | 7.14                     | 21.43                                 | 23.81                    | 35.71         |
| Anxiety score           | 38.10                                 | 19.05                                 | 19.05                    | 23.81                    | .             | 52.38                                 | .             | 28.57                    | 33.33                                 | 14.29                    | 52.38                    | 38.10                    | 61.90                                 | 42.86                    | 52.38                    | 19.05                    | 9.52                     | 33.33                                 | 38.10                    | 52.38         |
| Depression score        | 19.05                                 | 0.00                                  | 9.52                     | 4.76                     | 0.00          | 23.81                                 | 0.00          | 9.52                     | 19.05                                 | 19.05                    | 19.05                    | 19.05                    | 23.81                                 | 28.57                    | 19.05                    | 33.33                    | 4.76                     | 9.52                                  | 9.52                     | 19.05         |
| Physical activity level | Moderate                              | High                                  | High                     | High                     | .             | Low                                   | .             | Low                      | Moderate                              | Low                      | Low                      | Moderate                 | Moderate                              | Moderate                 | High                     | Moderate                 | Moderate                 | Moderate                              | Moderate                 | High          |
| KIDSCREEN score         | 43.35                                 | 55.07                                 | 44.48                    | 43.35                    | 66.86         | 34.70                                 | 48.29         | 59.85                    | 45.67                                 | 46.94                    | 41.24                    | 43.35                    | 41.24                                 | 40.24                    | 48.29                    | 38.34                    | 66.86                    | 46.94                                 | 46.94                    | 48.29         |

## Supplementary file 3 – SMS and Calls

| SMS received | Plan training | Plan call | Plan interview | Activity feedback | Plan end session | Total SMS sent | Total received | nb contact days | % no answer |
|--------------|---------------|-----------|----------------|-------------------|------------------|----------------|----------------|-----------------|-------------|
| <b>F1</b>    | 2             | 69        | 9              | 34                | 25               | 147            | 142            | 54              | 4           |
| <b>F2</b>    | 1             | 30        | 11             | 46                | 1                | 122            | 108            | 47              | 4           |
| <b>F3</b>    | 11            | 47        | 3              | 41                | 6                | 140            | 112            | 57              | 9           |
| <b>F4</b>    | 5             | 59        | 3              | 36                | 44               | 180            | 147            | 67              | 11          |
| <b>F5</b>    | 0             | 4         | 0              | 5                 | 0                | 24             | 15             | 12              | 29          |
| <b>F6</b>    | 6             | 25        | 14             | 25                | 3                | 89             | 76             | 43              | 9           |
| <b>F7</b>    | 4             | 43        | 5              | 29                | 5                | 88             | 92             | 38              | 0           |
| <b>F8</b>    | 5             | 14        | 6              | 37                | 2                | 88             | 66             | 36              | 14          |
| <b>F9</b>    | 5             | 21        | 4              | 18                | 6                | 78             | 58             | 42              | 17          |
| <b>F10</b>   | 0             | 21        | 1              | 43                | 9                | 95             | 75             | 41              | 16          |
| <b>F11</b>   | 1             | 6         | 1              | 5                 | 3                | 29             | 16             | 23              | 38          |
| <b>F12</b>   | 1             | 32        | 11             | 30                | 0                | 66             | 83             | 30              | 0           |

Table 3a: Content and number of SMS exchanges between the coordinator and the facilitators

|                   | Missed call | Phone conversations | % missed |
|-------------------|-------------|---------------------|----------|
| <b><u>F1</u></b>  | 2           | 8                   | 20       |
| <b><u>F2</u></b>  | 0           | 12                  | 0        |
| <b><u>F3</u></b>  | 1           | 15                  | 6        |
| <b><u>F4</u></b>  | 3           | 17                  | 15       |
| <b><u>F5</u></b>  | 26          | 5                   | 84       |
| <b><u>F6</u></b>  | 0           | 11                  | 0        |
| <b><u>F7</u></b>  | 0           | 10                  | 0        |
| <b><u>F8</u></b>  | 18          | 4                   | 82       |
| <b><u>F9</u></b>  | 0           | 4                   | 0        |
| <b><u>F10</u></b> | 3           | 10                  | 23       |
| <b><u>F11</u></b> | 26          | 5                   | 84       |
| <b><u>F12</u></b> | 11          | 9                   | 55       |

Table 3b: Number of phone conversations and missed calls between the coordinator and the facilitators

Note: The more successful facilitators are in bold and underlined

Supplementary file 4: illustrative quotes from the facilitators and receivers

|                                   |                                                  | FACILITATORS           |          |        |                                                                                                                                                                                                                                                                                                                                                                                                                                                                |                                                                                                                                                                                                                                                                                                                                                                                                         |
|-----------------------------------|--------------------------------------------------|------------------------|----------|--------|----------------------------------------------------------------------------------------------------------------------------------------------------------------------------------------------------------------------------------------------------------------------------------------------------------------------------------------------------------------------------------------------------------------------------------------------------------------|---------------------------------------------------------------------------------------------------------------------------------------------------------------------------------------------------------------------------------------------------------------------------------------------------------------------------------------------------------------------------------------------------------|
| Section                           | Main point                                       | Source                 | Person   | Gender | Age                                                                                                                                                                                                                                                                                                                                                                                                                                                            | Quote                                                                                                                                                                                                                                                                                                                                                                                                   |
| Organisational issues             | Time and transport and other logistical problems | Training session       | F6 (vs*) | Girl   | 15.0                                                                                                                                                                                                                                                                                                                                                                                                                                                           | yeah that will more be it I think [activities during the holidays] since honestly during class it's until 6pm Wednesday afternoon we have class also and everything and the weekend either it's to rest or do homework so umm                                                                                                                                                                           |
|                                   |                                                  | End of program session | F10      | Girl   | 16.0                                                                                                                                                                                                                                                                                                                                                                                                                                                           | well the people I had were residents [boarding school] so um they lived in um [city far away] (...) And like even every time there were teachers that swaped their lesson hours around and things like that so                                                                                                                                                                                          |
|                                   |                                                  | End of program session | F9       | Boy    | 15.4                                                                                                                                                                                                                                                                                                                                                                                                                                                           | I maybe overestimated that time [free time]                                                                                                                                                                                                                                                                                                                                                             |
|                                   |                                                  | End of program session | F3 (vs)  | Girl   | 15.0                                                                                                                                                                                                                                                                                                                                                                                                                                                           | Well what I found difficult was to find um the same date to do an activity with several people                                                                                                                                                                                                                                                                                                          |
|                                   |                                                  | End of program session | F7       | Girl   | 16.4                                                                                                                                                                                                                                                                                                                                                                                                                                                           | Well I called them [receivers] and I explained we talked a good 15min and then um then they told me um it wasn't possible, on Wednesdays they already had activities and there were some that had to keep their little sister too.                                                                                                                                                                      |
|                                   |                                                  | End of program session | F6 (vs)  | Girl   | 15.0                                                                                                                                                                                                                                                                                                                                                                                                                                                           | For [receiver] it was a transport problem timewise honestly you could see that he didn't mind joining in the activity or exercising or anything but it was really umm an organization thing                                                                                                                                                                                                             |
|                                   |                                                  | Telephone notes        | F2       | Girl   | 14.0                                                                                                                                                                                                                                                                                                                                                                                                                                                           | I didn't know it would be so hard. Either I forget. Either it's not possible.                                                                                                                                                                                                                                                                                                                           |
|                                   |                                                  | Mid program interview  | F1 (vs)  | Girl   | 15.8                                                                                                                                                                                                                                                                                                                                                                                                                                                           | Yeah I'll do it tonight because well before I had to revise for mock final exams                                                                                                                                                                                                                                                                                                                        |
|                                   |                                                  | SMS exchange           | F7       | Girl   | 16.4                                                                                                                                                                                                                                                                                                                                                                                                                                                           | well it's not that I don't want to do it anymore but it's tough I will soon have my exam and there are only 2 weeks left of class and [name of receiver] can't the two Wednesdays because she's looking for an internship and on Monday and Tuesday I finish class at 6pm and the other days she can't and during the holidays I can't because I will work so she's ok to do the activity in September. |
|                                   |                                                  | SMS exchange           | F12      | Girl   | 16.2                                                                                                                                                                                                                                                                                                                                                                                                                                                           | Coordinator: So is everything set for an activity next Wednesday?<br>Facilitator : No the sport hall is reserved                                                                                                                                                                                                                                                                                        |
|                                   | Mid program interview                            | F4 (vs)                | Boy      | 14.0   | well I did struggle a bit for exercising with good weather                                                                                                                                                                                                                                                                                                                                                                                                     |                                                                                                                                                                                                                                                                                                                                                                                                         |
|                                   | Contact issues with the coordinator              | End of program session | F10      | Girl   | 16.0                                                                                                                                                                                                                                                                                                                                                                                                                                                           | Yeah because I just didn't receive them for a while the messages. That's why I changed phone.                                                                                                                                                                                                                                                                                                           |
|                                   |                                                  | End of program session | F3 (vs)  | Girl   | 15.0                                                                                                                                                                                                                                                                                                                                                                                                                                                           | well me with my phone when I have a message I answer but well sometimes I just don't receive them                                                                                                                                                                                                                                                                                                       |
|                                   |                                                  | SMS exchange           | F8       | Girl   | 15.4                                                                                                                                                                                                                                                                                                                                                                                                                                                           | Coordinator: Can I call you on a landline?<br>Facilitator: I'm in a social home so the landline is reserved for adults                                                                                                                                                                                                                                                                                  |
|                                   |                                                  | SMS exchange           | F4 (vs)  | Boy    | 14.0                                                                                                                                                                                                                                                                                                                                                                                                                                                           | Facilitator: yes sorry I didn't have enough phone credit to answer                                                                                                                                                                                                                                                                                                                                      |
| Contact issues with the receivers | End of program session                           | F3 (vs)                | Girl     | 15.0   | well with [receiver] um since she didn't have any method of communication apart from um anyway it was really complicated                                                                                                                                                                                                                                                                                                                                       |                                                                                                                                                                                                                                                                                                                                                                                                         |
|                                   | SMS exchange                                     | F8                     | Girl     | 15.4   | Hello, I received your calls; I can't answer since I'm in study period, however I changed phone and I therefore don't have the numbers of [receiver 1] and [receiver 2] and since I plan on maybe going running tomorrow or Wednesday that would be easier to warn them by message :)                                                                                                                                                                          |                                                                                                                                                                                                                                                                                                                                                                                                         |
| Need for support                  | End of program session                           | F6 (vs)                | Girl     | 15.0   | Coordinator: so what could have helped you?<br>Facilitator: well for me if everything had been organised for the time the place and the activity then umm see with the others and do it all together but if everything was organised<br>Coordinator: Ok so ideally it would have been "ok so the court is reserved for badminton this day this time and [facilitator] is coming to do it with you"<br>Facilitator: Exactly! That would have been really great. |                                                                                                                                                                                                                                                                                                                                                                                                         |
|                                   | End of program session                           | F9                     | Boy      | 15.4   | yeah or just do a um I don't know grab a room and have a little ten minute meeting and call [take out of class] all of those who are interested to come um yeah just that it would have been, it would have maybe helped a little.                                                                                                                                                                                                                             |                                                                                                                                                                                                                                                                                                                                                                                                         |
|                                   | End of program session                           | F10                    | Girl     | 16.0   | And then when um we couldn't find dates anymore and then um that's when pff I got a bit fed up I told myself yeah it's crap I don't have any activities.                                                                                                                                                                                                                                                                                                       |                                                                                                                                                                                                                                                                                                                                                                                                         |

|                  |                                  |                        |         |      |      |                                                                                                                                                                                                                                                                                                                                               |
|------------------|----------------------------------|------------------------|---------|------|------|-----------------------------------------------------------------------------------------------------------------------------------------------------------------------------------------------------------------------------------------------------------------------------------------------------------------------------------------------|
| Other challenges | Motivation issues                | End of program session | F12     | Girl | 16.2 | Coordinator: But you knew them right?<br>Facilitator: Yeah but when I went to see them [receivers] they said "oh we don't care"                                                                                                                                                                                                               |
|                  |                                  | End of program session | F3 (vs) | Girl | 15.0 | Yeah it was rather easy. The only problem afterwards was that [receiver] thought that umm that the activities would be during um lessons. That's why she was motivated, to skip class                                                                                                                                                         |
|                  |                                  | SMS exchange           | F9      | Boy  | 15.4 | well it didn't go too well [the meeting] because one came and refused and the other didn't show                                                                                                                                                                                                                                               |
|                  |                                  | Mid program interview  | F4 (vs) | Boy  | 14.0 | I told him "you know I have a bike in the basement I have two biked in the basement if you want we could do a bit of cycling I'll lend you a bike" and so on [and the receiver responded] "oh no pralimap I don't do"                                                                                                                         |
|                  | Program clarity                  | End of program session | F2      | Girl | 14.0 | Like my friend [name of friend] she went to the pralimap thing but physically I mean ok she might have a little belly but she isn't she isn't fat she isn't um round or anything at all she is super pretty and all that and she had to go to the pralimap thing anyway not to mention that she doesn't eat anything so um I don't understand |
|                  |                                  | End of program session | F6 (vs) | Girl | 15.0 | it's mostly um mostly yeah having fun with the person and exercising together. I don't really see the nutrition part because we didn't really talk about it and and we don't really know more than the other person I think.                                                                                                                  |
|                  | Health issues                    | SMS exchange           | F8      | Girl | 15.4 | Hello, I have some bad news.. I am going to have to stop all physical activity due to an ice-skating accident and the discovery of scheuermann's disease which stops all type of physical activity. I'm really sorry for the inconvenience.                                                                                                   |
|                  | Interpersonnal skills            | SMS exchange           | F2      | Girl | 14.0 | sometimes, I doubt my abilities :/ in any case I'm not talented for organizing outings ^^" But actually, since we're only 3 and not specially friends, I don't really know what we could do... Should we do it with our own friends?                                                                                                          |
|                  |                                  | Mid program interview  | F9      | Boy  | 15.4 | Well because maybe I'm bossy well kind of bossy like for example pff if I think there's a bit of noise and I say to tone it down I think I might be a bit too bossy                                                                                                                                                                           |
|                  |                                  | Mid program interview  | F1 (vs) | Girl | 15.8 | well last time um because of [second facilitator] well because originally we were supposed to do it [the activity] together. And I saw that she wasn't trying and well on my own I was really struggling                                                                                                                                      |
| Good practice    | Regular contact with coordinator | End of program session | F7      | Girl | 16.4 | Coordinator: Ok why? [was it a good system]<br>Facilitator: well because we could get organised if we had something planned or not. And maybe we were in the middle of something                                                                                                                                                              |
|                  |                                  | End of program session | F6 (vs) | Girl | 15.0 | [following conversation above]<br>Facilitator: same for me                                                                                                                                                                                                                                                                                    |
|                  |                                  | End of program session | F9      | Boy  | 15.4 | Coordinator: And in terms of content because it's true that sometimes there wasn't much to say was it still useful being in touch?<br>Facilitator: Umm yeah I found it useful                                                                                                                                                                 |
|                  |                                  | End of program session | F3 (vs) | Girl | 15.0 | [following conversation above]<br>Facilitator: Yeah cause it helped us remember that it we really needed to do it (...) I had never forgotten but it, it remotivated me and stuff.                                                                                                                                                            |
|                  |                                  | End of program session | F1 (vs) | Girl | 15.8 | Coordinator: so what should the coordinator do if there are no responses to SMS                                                                                                                                                                                                                                                               |
|                  |                                  | End of program session | and F12 | Girl | 16.2 | F1 (very successful facilitator-girl): See with the school<br>F12 (facilitator-girl): Yeah definitely<br>Coordinator: why?<br>F1: Yeah well I think like say the person has changed number and everything<br>F12: They also often have the internship times if it's to do with that                                                           |
|                  | Physical activity                | End of program session | F10     | Girl | 16.0 | They asked me "oh you can go ice skating" I said "yes" so yeah as soon as you talk more directly about activities yeah it's actually cool they said "oh really you can do activities and everything oh well that's cool". (...)                                                                                                               |
|                  | Support of parents               | End of program session | F6 (vs) | Girl | 15.0 | There was also her [receiver] mom she um we did three activities and my dad brought her once and her mom twice so um it's certain that if that hadn't been there since it was super far nah it wouldn't have been possible.                                                                                                                   |

|                    |                       |         |     |      |                                                                                                                                                                                                                                 |
|--------------------|-----------------------|---------|-----|------|---------------------------------------------------------------------------------------------------------------------------------------------------------------------------------------------------------------------------------|
| Program commitment | Mid program interview | F4 (vs) | Boy | 14.0 | And just afterwards he told me “[swear word] they want me to do pralimap and everything” and I said “well why don’t you want to do it? If you want I can offer to be your facilitator since we’re neighbours it would be easy”. |
|--------------------|-----------------------|---------|-----|------|---------------------------------------------------------------------------------------------------------------------------------------------------------------------------------------------------------------------------------|

\* Note: (vs)= very successful facilitator

RECEIVERS

| Section            | Topic                   | Person                 | Status    | Gender | Age  | Quote                                                                                                                                                                                                                                                                                                                    |                                                                                                                                                                                                                                                                                                                                                                                                                                                                                                                                           |
|--------------------|-------------------------|------------------------|-----------|--------|------|--------------------------------------------------------------------------------------------------------------------------------------------------------------------------------------------------------------------------------------------------------------------------------------------------------------------------|-------------------------------------------------------------------------------------------------------------------------------------------------------------------------------------------------------------------------------------------------------------------------------------------------------------------------------------------------------------------------------------------------------------------------------------------------------------------------------------------------------------------------------------------|
| Social environment | Family relations        | R4d                    | Reluctant | Boy    | 15.8 | well since my step father works in the show business he often comes home late so I cook one day out of two I do it                                                                                                                                                                                                       |                                                                                                                                                                                                                                                                                                                                                                                                                                                                                                                                           |
|                    |                         | R4f                    | Passive   | Girl   | 15.3 | Receiver (passive receiver-girl): I am tired at the moment<br>Interviewer: why?<br>Receiver: because I have a lot of family problems and I don’t sleep well. I think too much about it. So I think I’m in bad health                                                                                                     |                                                                                                                                                                                                                                                                                                                                                                                                                                                                                                                                           |
|                    | High school             | R4e                    | Reluctant | Boy    | 15.2 | Receiver: no it’s the first time but it’s different from being at home [being in boarding school]<br>Interviewer: so what’s different from home?<br>Receiver: well you’re there all the time with friends so in the evenings we chat and laugh                                                                           |                                                                                                                                                                                                                                                                                                                                                                                                                                                                                                                                           |
|                    |                         | R4c                    | Passive   | Girl   | 15.9 | you never know how the others will react if you tell them something and most people here are, how to say it, really mean. They judge people based on physical appearance that’s why we like to stay just the four of us that’s why we stay in our own group.                                                             |                                                                                                                                                                                                                                                                                                                                                                                                                                                                                                                                           |
|                    | Relationship with peers | R4d                    | Reluctant | Boy    | 15.8 | Interviewer: so what is a mate then?<br>Receiver: they’re just people with who you laugh and all its not the 36 [friends] that I can actually open up to those are people who are always there for you.                                                                                                                  |                                                                                                                                                                                                                                                                                                                                                                                                                                                                                                                                           |
|                    |                         | R4e                    | Reluctant | Boy    | 15.2 | Receiver: badly because people from school most guys are thin and all that they chill and all talk to everyone laugh with everyone and it annoys me because I tell myself maybe if I stop eating I would talk to everyone and be in their shoes like                                                                     |                                                                                                                                                                                                                                                                                                                                                                                                                                                                                                                                           |
|                    |                         | R4a                    | Active    | Boy    | 17.6 | Interviewer: so with people here at school when you see them do you say hi?<br>Receiver: no I don’t say anything I just stay with [name of best friend] and that’s all.<br>not really we see each other only here [high school] yeah otherwise we stay in touch via telephone otherwise we don’t see each other outside. |                                                                                                                                                                                                                                                                                                                                                                                                                                                                                                                                           |
|                    |                         | R4f                    | Passive   | Girl   | 15.3 | Interviewer: so with your old friends how come you’re not friends anymore?<br>Receiver: no idea because I think we didn’t see each other anymore                                                                                                                                                                         |                                                                                                                                                                                                                                                                                                                                                                                                                                                                                                                                           |
|                    |                         | R4e                    | Reluctant | Boy    | 15.2 | Interviewer: and what bothers you why don’t you want to talk to your family?<br>Receiver: because we’re not of the same generation                                                                                                                                                                                       |                                                                                                                                                                                                                                                                                                                                                                                                                                                                                                                                           |
|                    | Health and overweight   | Defintition            | R4a       | Active | Boy  | 17.6                                                                                                                                                                                                                                                                                                                     | Interviewer: so what is health?<br>Receiver: to feel good<br>Interviewer: and that means?<br>Receiver: to feel good in your shoes not to be sick<br>Interviewer: and what is to feel good in your shoes?<br>Receiver: what can I say well feeling good not feeling fat                                                                                                                                                                                                                                                                    |
|                    |                         | Wanting to lose weight | R4b       | Active | Girl | 17.4                                                                                                                                                                                                                                                                                                                     | Receiver: well since everyone tells me I need to lose weight because of people staring (regard des gens) and all that I tell myself I don’t care if people look and judge because for me it’s my life it’s my body and all that they’re not the ones to tell me what I have to do. If I feel good I’ll stay this way<br>Interviewer: so why then do you say you want to lose a little [weight]?<br>Receiver: it’s mostly for clothes because often I can’t find my size often I have to go in the big sizes and it bugs me a bit all that |

|                    |                         |     |           |      |      |                                                                                                                                                                                                                                                                                                                                                                                                                                                                                                                                                                                                                                                                            |
|--------------------|-------------------------|-----|-----------|------|------|----------------------------------------------------------------------------------------------------------------------------------------------------------------------------------------------------------------------------------------------------------------------------------------------------------------------------------------------------------------------------------------------------------------------------------------------------------------------------------------------------------------------------------------------------------------------------------------------------------------------------------------------------------------------------|
|                    |                         | R4c | Passive   | Girl | 15.9 | for me it depends on the days [successful healthy behaviour] if I ate well at the school cafeteria I shouldn't be hungry or sometimes I see my mom eat and it makes me want to go grab some cookies                                                                                                                                                                                                                                                                                                                                                                                                                                                                        |
|                    |                         | R4a | Active    | Boy  | 17.6 | there are times I'm not careful but also we don't have the luck of eating a balanced diet we don't eat much fruit and vegetable at mine so I don't really have the opportunity to be careful so sometimes I eat in excess but um                                                                                                                                                                                                                                                                                                                                                                                                                                           |
|                    | PRALIMAP-INES           | R4c | Passive   | Girl | 15.9 | Interviewer: and how was it?<br>Receiver: it was ok<br>Interviewer: meaning?<br>Receiver: sometimes they only talked sometimes we moved<br>Interviewer: and you don't like talking?<br>Receiver: no                                                                                                                                                                                                                                                                                                                                                                                                                                                                        |
|                    | Lack of program clarity | R4f | Passive   | Girl | 15.3 | Interviewer: and were you aware of the activities in pralimap that you were offered<br>Receiver: no idea I said I didn't want to do it and that's it                                                                                                                                                                                                                                                                                                                                                                                                                                                                                                                       |
|                    |                         | R4b | Active    | Girl | 17.4 | Interviewer: and do you know about the peer activities in pralimap?<br>Receiver: no<br>Interviewer: were you not contacted by [name of facilitator]?<br>Receiver: oh yeah but I didn't think that was it                                                                                                                                                                                                                                                                                                                                                                                                                                                                   |
|                    | Potential barriers      | R4e | Reluctant | Boy  | 15.2 | Interviewer: so what stopped you?<br>Receiver: I don't know<br>Interviewer: was it the way he invited you?<br>Receiver: no because I didn't know him so that's it                                                                                                                                                                                                                                                                                                                                                                                                                                                                                                          |
|                    |                         | R4f | Passive   | Girl | 15.3 | Interviewer: so if I offered now what would you say?<br>Receiver: I don't know I think I would have said no<br>Interviewer: why?<br>Receiver: because I don't like doing activities with too many people<br>Interviewer: what if there were only 2 people<br>Receiver: oh then yes maybe                                                                                                                                                                                                                                                                                                                                                                                   |
| Program experience | Activity experience     | R4a | Active    | Boy  | 17.6 | Interviewer: and you felt comfortable? [during the activity]<br>Receiver: well not really at first because I didn't really know him, then getting to know him I felt more at ease.<br>(...)<br>Interviewer: And what did you do?<br>Receiver: we talked a lot<br>Interviewer: about what?<br>Receiver: we talked about ourselves he asked me why I participated in pralimap and told him and everything we talked about our jobs what we liked we talked about music too<br>Interviewer: all this whilst walking?<br>Receiver: yes for 2h<br>(...)<br>Interviewer: and so now you've become friends<br>Receiver: yes every time we see each other we say hi and everything |



# BMJ Open

## Using facilitator-receiver peer dyads matched according to socioeconomic status to promote behaviour change in overweight adolescents – a feasibility study

|                                 |                                                                                                                                                                                                                                                                                                                                                                                                                                                                                                                                                                                                                                                                                                                                                                                                                                                                                                                                                                                                                                                                                                                                                 |
|---------------------------------|-------------------------------------------------------------------------------------------------------------------------------------------------------------------------------------------------------------------------------------------------------------------------------------------------------------------------------------------------------------------------------------------------------------------------------------------------------------------------------------------------------------------------------------------------------------------------------------------------------------------------------------------------------------------------------------------------------------------------------------------------------------------------------------------------------------------------------------------------------------------------------------------------------------------------------------------------------------------------------------------------------------------------------------------------------------------------------------------------------------------------------------------------|
| Journal:                        | <i>BMJ Open</i>                                                                                                                                                                                                                                                                                                                                                                                                                                                                                                                                                                                                                                                                                                                                                                                                                                                                                                                                                                                                                                                                                                                                 |
| Manuscript ID                   | bmjopen-2017-019731.R1                                                                                                                                                                                                                                                                                                                                                                                                                                                                                                                                                                                                                                                                                                                                                                                                                                                                                                                                                                                                                                                                                                                          |
| Article Type:                   | Research                                                                                                                                                                                                                                                                                                                                                                                                                                                                                                                                                                                                                                                                                                                                                                                                                                                                                                                                                                                                                                                                                                                                        |
| Date Submitted by the Author:   | 07-Feb-2018                                                                                                                                                                                                                                                                                                                                                                                                                                                                                                                                                                                                                                                                                                                                                                                                                                                                                                                                                                                                                                                                                                                                     |
| Complete List of Authors:       | Saez, Laura; Universite de Lorraine Faculte de Medecine, EA 4360 APEMAC<br>Legrand, Karine; Nancy University Hospital, Epidemiology and clinical evaluation department; Universite de Lorraine Faculte de Medecine, EA 4360 APEMAC<br>Alleyrat, Camille; Nancy University Hospital, Epidemiology and clinical evaluation department<br>Ramisaso, Serge; Universite de Lorraine Faculte de Medecine, EA 4360 APEMAC<br>Langlois, Johanne; Conservatoire National des Arts et Métiers; Universite de Lorraine Faculte de Medecine, EA 4360 APEMAC<br>Muller, Laurent; University of Lorraine, EA 4360 APEMAC<br>Omorou, Abdou ; Nancy University Hospital, Epidemiology and clinical evaluation department; Universite de Lorraine Faculte de Medecine, EA 4360 APEMAC<br>De Lavenne, Rozenn; Academy Rector of Nancy and Metz<br>Kivits, Joelle; Universite de Lorraine Faculte de Medecine, EA 4360 APEMAC<br>Lecomte, Edith; Conservatoire National des Arts et Métiers<br>Briçon, Serge; Universite de Lorraine Faculte de Medecine, EA 4360 APEMAC<br>Trial Group, PRALIMAP-INÈS; Universite de Lorraine Faculte de Medecine, EA 4360 APEMAC |
| <b>Primary Subject Heading</b>: | Public health                                                                                                                                                                                                                                                                                                                                                                                                                                                                                                                                                                                                                                                                                                                                                                                                                                                                                                                                                                                                                                                                                                                                   |
| Secondary Subject Heading:      | Qualitative research                                                                                                                                                                                                                                                                                                                                                                                                                                                                                                                                                                                                                                                                                                                                                                                                                                                                                                                                                                                                                                                                                                                            |
| Keywords:                       | peer education, overweight, health inequalities, sociocognitive theory, adolescent health                                                                                                                                                                                                                                                                                                                                                                                                                                                                                                                                                                                                                                                                                                                                                                                                                                                                                                                                                                                                                                                       |
|                                 |                                                                                                                                                                                                                                                                                                                                                                                                                                                                                                                                                                                                                                                                                                                                                                                                                                                                                                                                                                                                                                                                                                                                                 |

SCHOLARONE™  
Manuscripts

1  
2  
3 **Title : Using facilitator-receiver peer dyads matched according to socioeconomic status to**  
4 **promote behaviour change in overweight adolescents – a feasibility study**

5  
6 Authors: Laura Saez<sup>a</sup>, Karine Legrand<sup>a,b</sup>, Camille Alleyrat<sup>b</sup>, Serge Ramisaso<sup>a</sup>, Johanne Langlois<sup>a,c</sup>,  
7 Laurent Muller<sup>d</sup>, Abdou Y. Omorou<sup>a,b</sup>, Rozenn De Lavenne<sup>e</sup>, Joëlle Kivits<sup>a</sup>, Edith Lecomte<sup>c</sup>, Serge  
8 Briançon<sup>a</sup>.

9  
10 PI trial Group: Philip Böhme<sup>f</sup>, Cécile Gailliard<sup>b</sup>, Céline Pourcher<sup>e</sup>, Marie-Hélène Quinet<sup>e</sup>,  
11 Elisabeth Spitz<sup>d</sup>, Brigitte Toussaint<sup>e</sup>.

12  
13  
14 a University of Lorraine, APEMAC EA 4360, Nancy, France

15 b INSERM, CIC-1433, CHRU Nancy, F-54 000, France

16 c National Conservatory of Arts and Crafts (CNAM), Nancy, France

17 d University of Lorraine, APEMAC EA4360, Metz, France

18 e Academy Rector of Nancy and Metz, Nancy, France

19 f University Hospital of Nancy, Department of diabetology, metabolic diseases and nutrition,  
20 Nancy, France

21  
22 Corresponding author: Laura Saez

23 Address: School of Public Health, 9 Avenue de la Forêt de Haye, 54500 Vandœuvre-lès-Nancy,  
24 France

25 Phone: 33 (0) 3 72 74 61 96

26 Fax: 33 (0) 3 72 74 62 04

27 Email: laura.saez@univ-lorraine.fr

28  
29 Word count : 8030  
30  
31  
32  
33  
34  
35  
36  
37  
38  
39  
40  
41  
42  
43  
44  
45  
46  
47  
48  
49  
50  
51  
52  
53  
54  
55  
56  
57  
58  
59  
60

## Abstract

### Objectives

Evaluate the feasibility of an innovative peer intervention promoting healthy eating and physical activity which purposefully selected peer facilitators according to socioeconomic status to target less-advantaged overweight receivers.

### Setting

Nine high schools, 2 middle schools.

### Participants

One hundred and fifty-six adolescents were approached to become facilitators of which 18 were trained. Thirty-two of 56 potential receivers agreed to participate.

### Intervention

The peer intervention was carried out in 2013-14 and embedded in a larger trial: PRALIMAP-INÈS. Facilitators were selected and trained to organise weight-control activities with specific peer receivers participating in the programme.

### Primary and secondary outcome measures

Different types of data were collected to assess demand, acceptability, implementation and practicality of the intervention. For the facilitators, this included 6 training sessions, 11 mid-programme interviews, 4 end-of-programme sessions, telephone notes and SMS exchanges. All 6 potential receivers in one school were also interviewed. Sociodemographic and health characteristics were also analysed.

### Results

Agreeing to participate was more likely when asked by a peer compared to a professional (51.2% discordant pairs;  $P < 0.02$ ). Twelve activities, mostly based on physical activity and implemented during weekends or holidays, were carried out. The mean age of active receivers was 16 and their BMI was higher than other participants. For both facilitators and active receivers there were more participating girls. Qualitative analysis reveals key implementation challenges for facilitators. Interviews with the receivers highlight social difficulties with most feeling bad about their appearance and wanting to lose weight. Those who participated in peer activities were very positive about the experience especially social support.

### Conclusions

The present study suggests the peer intervention was feasible provided organisational difficulties are addressed. Good practice recommendations are formulated including a longer training session, organising a joint meeting with the facilitators and receivers, matching dyads on place of residence and multiplying modes of contact.

### Strengths and limitations of the study

- To the authors' knowledge this is the first intervention to purposefully select peer facilitators matched on the basis of the socioeconomic status of the receivers.
- The peer intervention is based on sociocognitive theory with a particular focus on peer modelling, peer support and practice opportunities for mastering desired behaviours as opposed to the traditional concept of peer education based on transmission of information.
- The intervention was embedded in a large-scale research study allowing systematic collection of data and an in-depth process analysis with different sources of qualitative material was also carried out to triangulate findings and grasp implementation challenges.

- There were fewer peer-led activities carried out than expected and many organisational challenges need to be addressed and serve as lessons learned in order to facilitate implementation in future interventions.
- Results provide an indication of the potential feasibility of the peer intervention but further research with a larger sample size is necessary to confirm findings on the characteristics of the participants and empirically evaluate the effectiveness of the intervention to improve the dietary and physical activity behaviour of the receivers.

**Keywords:**

peer education, obesity, overweight, adolescents, physical activity, health inequalities, nutrition, physical activity, sociocognitive theory

**INTRODUCTION**

Schools are considered to be ideal settings for health promotion interventions, particularly in the context of lifestyle interventions for weight management[1–3]. Indeed, it has been argued that the school setting intrinsically exposes children and adolescents to dietary and physical activity factors[4]. Furthermore, pupils spend a significant amount of their time in school for which attendance is often compulsory. This means that it is possible for interventions to reach almost all adolescents, regardless of socioeconomic status in a relatively short time. For this reason, it has been suggested that the school setting may be particularly important in order to reduce health inequalities[5]. However, concerns have been raised about the fact that school interventions may not benefit all adolescents equally and the need for specific examination of minority groups has been expressed[6,7].

One reason that school-based interventions may not benefit all adolescents equally could be the socioeconomic gap between health experts delivering the interventions and adolescents of low socioeconomic status. For example, in a French evaluation of peer-led health interventions, it was highlighted that young people are critical with regard to health prevention interventions carried out by professionals[6]. It is also believed that adolescents feel stigmatised by adults because they feel they are considered as a “risky age group”, which is a negative prejudice, and they do not feel implicated in health policies designed for them [8]. Furthermore, there seems to be an association between adolescents’ eating habits and physical activity level and that of family and friends suggesting involvement of adolescents’ social environment may enhance the effectiveness of weight control interventions [9,10]. For example, it has been shown that higher levels of physical activity among friends are associated with higher levels of physical activity of the individual and that an individual's level of physical activity changes to reflect his/her friends’ higher level of physical activity[10]. In addition, when health interventions are performed by peers, they seem to have a higher level of acceptability and age proximity is especially valued because of the belief that adolescents of the same age understand each other better than adults would[6]. The central tenet of the effectiveness of peer education is that the influence of peers and friends are likely to become more important as children get older[11]. For example, the review by Salvy and colleagues (2012)[11] highlights that young people are more physically active when in the company of peers and friends and overweight boys paired with non-overweight peers increase their physical activity to a level similar to the non-overweight peer.

Given these observations, a call has been made to increase the number of health promotion and prevention programmes in schools in France, especially those delivered by peers[6]. Peer education has been extensively implemented with encouraging results across settings and in several health domains, especially sexual health and HIV prevention[12–14] but also smoking prevention and substance use[15,16]. More recently, peer-based approaches have been described as promising avenues for behavioural weight-control interventions with positive

1  
2  
3 results including weight loss, reduction in waist circumference, less sedentary behaviour,  
4 improved attitudes towards healthy eating and exercise and increased self-efficacy[2,17–24].  
5 Across domains, a key recommendation for school-based interventions is that they be  
6 behaviourally focussed[7].  
7

8 Despite promising results, the evidence for the effectiveness of peer education is unclear and  
9 one reason that has been put forward is the lack of theoretical embedding of the  
10 interventions[16,25,26]. In the present study, the choice was made to use sociocognitive theory  
11 as the theoretical basis of the intervention[27], with a particular focus on peer modelling as well  
12 as increasing self-efficacy through peer support and practice opportunities for mastering the  
13 desired behaviours. This concept of the role of peer interveners overlaps with two types of peer  
14 interventions as recently defined by Bagnall and colleagues[28]. The first is peer mentoring as  
15 “the development of a relationship between two individuals where the mentee is able to learn  
16 from the mentor, model positive behaviour and gain experience, knowledge or skills”. The  
17 second is peer support which “seeks to promote health and build people’s resilience to different  
18 stressors”[28].  
19

20 The objective of this feasibility study was therefore to develop and evaluate a peer intervention  
21 to promote physical activity and healthy eating intending not to widen health inequalities by  
22 purposefully selecting adolescent peer facilitators that were also of low socioeconomic status in  
23 order to target less-advantaged overweight adolescents. Given the innovative method of  
24 selecting less-advantaged adolescents as peer interveners, the feasibility study aimed to assess  
25 the earlier stages of intervention development as highlighted by Bowen and colleagues [29],  
26 namely intervention acceptability, demand, implementation and practicality.  
27

## 28 **METHODS**

### 29 **PRALIMAP-INÈS study**

30  
31  
32 The current study was carried out during the 2013-14 academic year within a larger research  
33 programme, PRALIMAP-INÈS (Promotion de l’ALIMENTation et l’Activité Physique-INEgalité de  
34 Santé), running over a three-year period for the prevention of overweight and obesity in France.  
35 The study protocol of PRALIMAP-INÈS has been described in detail elsewhere[30]. Briefly,  
36 PRALIMAP-INÈS is a mixed quasi-experimental and experimental prospective trial aimed at  
37 overweight and obese adolescents aged 13 to 18 attending grade 9 in state-run middle-schools  
38 (last year of “collège” in French) and grade 10 in high-schools (first year of “lycée” in French) in  
39 the Vosges department (north-eastern France). At the beginning of the school year a screening  
40 process was carried out in the school setting (T0). All adolescents were measured and those  
41 with a Body Mass Index (BMI) greater than the International Obesity Task Force (IOTF)  
42 overweight thresholds for age and gender[31], or with a waist circumference greater than the  
43 McCarthy cut-off values for age and gender[32], also filled out several questionnaires and were  
44 offered a series of interventions. Socioeconomic status (SES) was measured by the WHO Family  
45 Affluence Scale (FAS) questionnaire[33,34] and a score equal or below 5 was considered to  
46 indicate less-advantaged status. At the end of the academic year (T1), students were measured  
47 again and filled out several questionnaires including their appreciation of the programme and  
48 its components. The trial was approved by the French consultative committee for treatment of  
49 information in health research (no. 12.299), the French National Commission for Data  
50 Protection and Liberties (no. 912372) and the French Persons Protection Committee (no.  
51 2012/15).  
52

### 53 **Peer intervention description and logic model**

54  
55 As part of the PRALIMAP-INÈS programme, the current feasibility study focussing on the peer  
56 intervention was integrated and targeted at adolescents of the “less advantaged with standard  
57  
58  
59  
60

1  
2  
3 and strengthened-care » (L.A.S.S) group during the 2013-14 academic year, representing 262  
4 adolescents. In the sense that the role of the peer interveners was to encourage physical activity  
5 and healthy eating, the term “facilitator” is preferred and “receivers” for those receiving the  
6 intervention.

7  
8 The peer intervention was based on sociocognitive theory which posits four mechanisms  
9 potentially important for self-efficacy and consequently the possibility of behaviour change: 1)  
10 performance outcomes, activated here by successfully carrying out weight-control activities  
11 (mastery experiences), 2) vicarious experiences, observing facilitators carry out weight-control  
12 activities, 3) verbal persuasion, facilitators should encourage healthy eating and physical  
13 activity and 4) emotional arousal which may in the present intervention entail positive  
14 emotions through social interaction with the facilitators during weight-control activities [27]. It  
15 was expected that through simple contact with the facilitators and other peers involved in the  
16 intervention, peer receivers would benefit from general social support and develop  
17 interpersonal skills. Carrying out weight-control activities with the facilitators was expected to  
18 bring information exchange, increased self-efficacy as well as support for the target behaviour  
19 change.

20  
21 In order to carry out the peer intervention, two types of peer facilitator were selected: peer  
22 ambassadors were adolescents having participated in the PRALIMAP-INÈS programme the  
23 previous year and peer entrepreneurs were adolescents screened at the beginning of the school  
24 year in 2013 and having no previous experience of the programme. Both peer ambassadors and  
25 entrepreneurs were selected according to the following criteria: an ability to control their  
26 weight as evaluated by a physician, motivation to become peer facilitators and an FAS score  $\leq 5$   
27 suggesting that they were of similar socioeconomic background as the peers they would be  
28 organizing activities with. In addition to similarity in socioeconomic background, facilitators  
29 were peers in terms of attending the same school and age similarity; the ambassadors being a  
30 year older and the entrepreneurs being from the same year group.

31  
32 Peer facilitators received a 2-hour training session delivered during school time at the  
33 beginning of the academic year by a member of the PRALIMAP-INÈS team responsible for the  
34 peer intervention (LS). Training sessions were carried out in groups ranging from 2 to 4  
35 adolescents and if it was not possible to regroup potential facilitators, training was done on an  
36 individual basis. The first part of the training session invited each adolescent to present  
37 him/herself and to consider why they would be a good facilitator in terms of skills and  
38 motivation. The objective of this part of the training session was to reinforce motivation and  
39 feelings of self-efficacy of the adolescents. The next part of the training session consisted in  
40 presenting the role of facilitator and brainstorming potential activities to be carried out and  
41 resources they could call upon to help them with this task. By brainstorming activities together,  
42 adolescents could be inspired from each other's ideas, get direct feedback in order to detail the  
43 implementation of their ideas with a focus on feasibility and start understanding more  
44 concretely what their role would entail. Another key moment of the training session was role  
45 playing key situations that the facilitators may face including: initial contact with the receivers  
46 and difficulties motivating receivers. Each role play was followed by feedback from the  
47 participants and observers as well as debriefing tips. Satisfaction with the training session was  
48 evaluated at the end of the session.

49  
50 Following the training session, the facilitators who wished to continue were assigned a small  
51 group of peers which they had to contact and with which they were encouraged to develop  
52 activities based on their common interests to pursue throughout the academic year. The initial  
53 target was to organise and carry out 4 activities anytime in the school year. Great freedom was  
54 given to the facilitators as regards the choice of activities, whether they aimed at physical  
55 activity or healthy eating, as well as the time, place and implementation method of their chosen  
56 activities. The peer intervention was therefore implemented as part of a larger health  
57

programme in the school setting but designed to be non-formal in its educational approach and allow activities to be carried out outside of school premises. The facilitators discussed their chosen activities with the programme coordinator (LS) and financial support was offered if it was necessary for the implementation of the activities.

Throughout the school year, facilitators were contacted on a regular basis for follow-up and support for the implementation of the weight-control activities with their receivers in the form of telephone calls as well as text messages (SMS) by the programme coordinator (LS). A mid-programme face-to-face interview was also carried out with each of the facilitators in order to maintain their motivation and allow a more in-depth exchange on the implementation challenges they faced. At the end of the academic year, all facilitators were invited to a formal end-of-programme session and they were rewarded for their time and effort with a certificate.

### Feasibility criteria, material and analysis

Demand was evaluated by gathering expressed interest and participation rates of the peer intervention, for ambassadors, entrepreneurs and receivers. Expressed interest for being an ambassador, entrepreneur and receiver was obtained by a member of the PRALIMAP-INÈS team at the beginning of the school year during the screening process. The intervention was then offered a second time to the receivers directly by their allocated facilitator which enabled a comparison of expressed interest of receivers whether the intervention was offered by a professional or a peer.

Acceptability of the intervention was assessed in terms of satisfaction (spontaneous expression and answers to specific questions) and perceived appropriateness (expression of unease, reluctance or, on the contrary, enthusiasm in discourse). Implementation was evaluated in terms of how many, what type and when weight-control activities were carried out, as well as assessing the type and extent of support needed from the programme coordinator in terms of number and purpose of SMS exchanges and calls. Finally, practicality was evaluated by a detailed analysis of the factors affecting implementation ease or difficulty. In order to answer these research questions, the training sessions, mid-programme interviews and end-of-programme sessions, on top of their functionality within the peer intervention programme, also served as focus groups. They were all audio recorded, with the consent of the adolescents present, and transcribed. The material was then coded in NVivo10 by performing a thematic analysis. Telephone notes of each conversation with the facilitators and all SMS exchanges were also added to NVivo and coded. All these sources were analysed together to obtain a general view of acceptability, implementation and practicality from the point of view of the facilitators.

Furthermore, in order to gain more insight into the experience of the receivers, all 6 potential receivers from one high school, whether they chose to participate or not, were invited for an individual interview. These interviews were also transcribed, added to the NVivo database and coded using the same coding grid as the analysis on the facilitators in terms of their experience of the peer intervention but with an additional focus on the characteristics of the potential receivers in particular the following two themes: friendship and other peers (definition and number) and health and overweight (definition and personal experience).

A descriptive analysis was also undertaken on the information on facilitators and receivers collected by measures and questionnaires as part of the larger PRALIMAP-INÈS at the start and end of the school year. Physical activity and sedentary behaviour were measured by the International Physical Activity Questionnaire (IPAQ) [35], the EAT-26[36,37] screened for anorexia and bulimia symptoms, the Hospital Anxiety and Depression scale (HAD)[38] screened for anxiety and depression symptoms and the Kidscreen[39] explored perceived health and quality of life. Study sample characteristics (age, gender, school type, FAS, BMI) and health scores (physical activity level, total EAT-26 score, total HAD score as well as individual scores

for anxiety and depression and the Kidscreen score) were described using percentages for categorical variables and mean  $\pm$  SD (standard deviation) for quantitative variables. Statistical analyses were carried out using SAS 9.4 (SAS Inst., Cary, NC, USA).

The main research questions to assess feasibility and how each source of data collected and analysed contributed to answering those questions is summarized in Supplementary file 1.

The facilitator training sessions, mid-programme interviews, end-of-programme sessions as well as the follow up of the facilitators by phone calls and SMS exchanges were designed and carried out by the peer intervention coordinator (LS). Receiver individual interviews were designed and carried out by an MSc student (SR) in collaboration with the peer intervention coordinator. All material was coded in NVivo by the peer intervention coordinator.

To illustrate main qualitative results, quotes from the facilitators and receivers were selected and translated from French into English.

## RESULTS

### Recruitment and participation

The flow chart illustrating the recruitment process of facilitators is illustrated in Figure 1. Of the 39 eligible ambassadors and 117 entrepreneurs, 20 and 36 adolescents agreed to become a peer facilitator respectively. Of the 39 facilitators who volunteered and were contacted, 18 were able to benefit from a training session in school. The reasons for not benefiting from a training session are diverse and include: not answering, changing their mind about participating and also not having enough receivers in the school to justify training a facilitator. The 18 facilitators benefiting from a training session came from 10 different schools and in total 6 training sessions were carried out. The participants were highly satisfied with the training session: on a 4-point scale, the average global satisfaction score with the training session was 3.8. The average score for specific questions were: having had a nice time (3.9), finding the training session useful (3.8), that the training session was sufficiently long (3.8), that it met their expectations (3.7) and that they felt ready to become facilitators (3.6). All scores ranged between 3 and 4. When asked what they enjoyed most, of the 18 trained facilitators, 13 spontaneously reported the role plays.

INSERT Figure 1

The recruitment process for the receivers is detailed in Figure 2. Of the 151 receivers for which there was a trained facilitator in the school who continued after training, 56 were randomly selected for contact by the facilitators. Of the 56 potential receivers, 25 did not formally accept the peer intervention of whom only 8 actually declining to participate. Thirty-two accepted the proposition and at the end of the peer intervention, 8 adolescents had benefited from at least one weight-control activity with a facilitator. Twenty-four adolescents did not benefit from an activity which, in the majority of cases, was due to the facilitator not managing to organise one. Another main reason for not benefiting from an activity is not being able to join for a variety of reasons such as not having transport or timetable clashes. Another interesting result is that willingness to participate in a peer-led intervention had already been asked by a professional at the beginning of the year during the measurement and screening process. For the 45 potential receivers who gave an answer both to the professional and to the facilitator later on, there was a significant difference of acceptance of the peer intervention with receivers more readily accepting when offered by a peer rather than a professional (MacNemar  $X^2=6.55$ ; 51,2% discordant pairs;  $P<0.02$ ). Of note is that of the 32 potential receivers who accepted the peer intervention, only 7 had declared lacking friends with which to do physical activity in the IPAQ questionnaire.



INSERT Figure 2

### Characteristics of facilitators and receivers

Characteristics of the 12 facilitators and 8 active receivers are described in Table 1. Individual characteristics of each facilitator and receiver are presented in Supplementary file 2. Of the 12 facilitators that continued after the training session, there were twice as many girls as boys. Facilitators were aged between 14 and 17, with ambassadors naturally being older than the entrepreneurs on average since they belong to the year group above. The average age of active receivers is higher than the entrepreneurs, even though they came from the same year group. The BMI of the facilitators ranged from 20 to 29. Ambassadors who continued were mostly from professional high schools. Interestingly, entrepreneurs tended overall to have better health scores than the ambassadors and the receivers which may be linked to the difference in BMI. The receivers who carried out a weight-control activity seemed generally already quite active in their lives in terms of level of physical activity.

Table 1: Characteristics of entrepreneurs, ambassadors and receivers

|                         |                                       | Entrepreneurs* | Ambassadors** | Receivers | Complete LA.SS group |
|-------------------------|---------------------------------------|----------------|---------------|-----------|----------------------|
| N                       |                                       | 7              | 5             | 8         | 262                  |
| Gender                  | Boy                                   | 2              | 2             | 3         | 114                  |
|                         | Girl                                  | 5              | 3             | 5         | 148                  |
| School type             | General and technological High School | 3              | 1             | 2         | 91                   |
|                         | Vocational High School                | 2              | 4             | 5         | 117                  |
|                         | Middle School                         | 2              | 0             | 1         | 54                   |
| Age                     |                                       | 15.1           | 16.0          | 16.0      | 15.4                 |
| BMI                     |                                       | 22.3           | 27.0          | 28.8      | 26.8                 |
| FAS score               |                                       | 4.0            | 4.6           | 4.3       | 4.1                  |
| EAT 26 score            |                                       | 8.1            | 13.5          | 14.5      | 13.8                 |
| HAD score               |                                       | 18.0           | 25.2          | 28.6      | 28.7                 |
| Anxiety score           |                                       | 30.5           | 33.3          | 38.7      | 34.9                 |
| Depression score        |                                       | 14.3           | 17.1          | 18.5      | 23.7                 |
| Physical activity level | High                                  | 3              | 0             | 2         | 61                   |
|                         | Moderate                              | 1              | 2             | 6         | 96                   |
|                         | Low                                   | 1              | 3             | 0         | 77                   |
|                         | Missing                               | 2              | 0             | 0         | 28                   |
| Kidscreen score         |                                       | 48.0           | 47.4          | 47.1      | 46.6                 |

\*Data was collected during the screening session at the start of the 2013-14 academic year

\*\*Data was collected at the follow-up visit at the end of the 2012-13 academic year

The 32 receivers who agreed to participate in the peer intervention had a higher BMI than the 25 who didn't give a positive answer and this result approached significance ( $P=0.07$ ). There were no other statistically significant differences between these two groups in terms of age, gender, school type, deprivation index as well as anxiety, depression, bulimia or anorexia symptoms, physical activity as well as perceived health and quality of life. The 8 receivers having carried out an activity were significantly older (15.3 vs 16.1  $P=0.018$ ) than the 24 adolescents having said yes but who did not, for various reasons, participate in an activity. There was no significant difference between the adolescents who agreed to become facilitators

and those who didn't, both for entrepreneurs and ambassadors on any of the above-mentioned variables.

### Weight-control activities and other tasks

Several tasks were considered important in order to be a successful facilitator. Facilitators had to think of, plan and implement an activity without giving up during the school year. In order to be considered successful they also had to come to the training session, the mid-programme interview and the end-of-programme session. Of the 12 facilitators, 4 were considered to be very successful, having achieved all or the majority of the above-mentioned tasks.

It is clear that the task of implementing an activity was difficult for the facilitators as only half managed to do so, despite the vast majority having managed to think of and plan one. Furthermore, 3 facilitators formally quit before the end-of-programme session and 1 more tacitly quit by no longer answering any messages or calls.

In total, 12 weight-control activities were carried out by 6 facilitators (see Table 2). Facilitators who did manage to plan and implement an activity then usually implemented 2 or more activities. Facilitators had a clear preference for organising activities centred on physical activity (10) rather than healthy eating (2) and they preferred organising activities during holidays or weekends, not on school days. Walking was a simple but popular activity amongst facilitators and receivers.

Although each facilitator was initially tasked with contacting several receivers and organising group activities, in practice activities were carried out in dyads. Only two activities were carried out in a group, both for healthy eating activities. In fact, only one facilitator managed to organise activities with two different receivers. Furthermore, one facilitator was only able to carry out an activity by including her usual friends.

Table 2: Weight-control activities carried out by the facilitators

| Day      | Activity        | Type              | Receiver*      | Facilitator* |
|----------|-----------------|-------------------|----------------|--------------|
| weekday  | Walking         | Physical Activity | R4b            | F4           |
| weekday  | Cooking a meal  | Healthy Eating    | R5a and R5b    | F5           |
| holidays | Walking         | Physical Activity | R6             | F6           |
| holidays | Walking         | Physical Activity | R6             | F6           |
| holidays | Walking         | Physical Activity | R6             | F6           |
| holidays | Football        | Physical Activity | R1             | F1           |
| holidays | Biking          | Physical Activity | R1             | F1           |
| weekend  | Walking         | Physical Activity | R4a            | F4           |
| weekend  | Walking and Wii | Physical Activity | R3             | F3           |
| weekend  | School meal     | Healthy Eating    | R2 and friends | F2           |
| weekend  | Basketball      | Physical Activity | R1             | F1           |
| weekend  | Fitness trail   | Physical Activity | R3             | F3           |

\*Individual receivers and facilitators are anonymously numbered with the number of the facilitators corresponding to the number of their matched receiver(s).

Although potential ambassadors were considerably more likely to accept becoming a facilitator than potential entrepreneurs (see Figure 1), entrepreneurs were much more likely to manage to organise and implement a weight-control activity with a receiver: 5 of the 6 who managed were entrepreneurs.

## Facilitator need for support

The difficulty of organising weight-control activities for the facilitators is reflected in the acute need for support which is highlighted by the important number of SMS exchanges and calls between the coordinator and the facilitators (Table 3). The detail of the SMS exchanges and calls with each facilitator is presented in Supplementary file 3.

Table 3: Number and content of SMS exchanges and phone conversations between the coordinator and the facilitators

|                     | Entrepreneurs | Ambassadors |
|---------------------|---------------|-------------|
| <b>SMS (mean)</b>   |               |             |
| Plan training       | 4.0           | 2.6         |
| Plan call           | 28.6          | 34.2        |
| Plan interview      | 5.4           | 6.0         |
| Activity feedback   | 33.3          | 7.8         |
| Plan end session    | 9.3           | 7.8         |
| Total SMS sent      | 105.4         | 81.6        |
| Total received      | 85.6          | 78.2        |
| Number contact days | 43.3          | 37.4        |
| % no answer         | 13.1          | 11.7        |
| <b>Call (mean)</b>  |               |             |
| Missed call         | 7.3           | 7.8         |
| Phone conversation  | 10.6          | 7.2         |
| % missed            | 30.0          | 31.8        |

The SMS exchanges and telephone calls underline that intense support was necessary, whether the facilitators were more successful or not and also whether they managed to implement an activity or not. The total number of SMS sent to the facilitators ranges from 24 and 180 with corresponding contact days between 12 and 67. Between 4 and 15 telephone conversations on different days were also carried out with each facilitator.

In terms of content of the SMS exchanges, activity feedback was the main purpose of the SMS exchanges but this is closely followed by planning phone meetings for more in-depth conversations. The most successful facilitators had a maximum of 20% missed calls and for all but one, less than 10% no response rate to received SMS suggesting that despite constraints, they were organised and reliable. A general observation can also be made in that the percentage of missed calls is much higher in general than the percentage of non-response to SMS contact, suggesting that adolescents prefer this mode of contact. The fact that entrepreneurs, much more often than ambassadors, successfully implemented activities is reflected by the higher number of contact days, total SMS exchanges and phone conversations.

## Insights from interviews, focus groups and process data

### Facilitator views

The most illustrative quotes from the 6 training sessions, 11 mid-programme interviews, 4 end-of-programme sessions, telephone notes and SMS exchanges are presented in Supplementary file 4.

### *Main challenges*

#### *Organizational issues*

All facilitators encountered organizational issues, whether they managed to carry out an activity or not. However, each facilitator seemed to be faced with a different combination of challenges

1  
2  
3 indicating that none is in itself impossible to overcome. Major organizational issues, concerning  
4 8 of the 12 facilitators or more include lack of time, their own or that of their receivers, as well  
5 as timetable clashes, transport problems and remembering to carry out all the necessary tasks  
6 for organising the activity. These organisational issues were so common they were evidenced in  
7 all types of process data. An unforeseen major problem was the amount of time spent away  
8 doing internships for some students in professional high schools. Other common issues included  
9 having difficulties with the logistical organisation but also bad weather which some facilitators  
10 considered as problematic.

11  
12 Furthermore, a very widespread but surprising difficulty, given it was specifically addressed  
13 during training, was the lack of ideas for what activities to organize. This was very present in  
14 the telephone notes as well as several SMS exchanges.

15  
16 Another unexpected organizational difficulty was contacting the facilitators, even the very  
17 successful ones. Common issues were changing numbers and phones but also having  
18 dysfunctional phones or sometimes not having a mobile phone for a certain amount of time  
19 before getting a new one. Several difficulties were also specific to working with less advantaged  
20 adolescents such as limited phone credit. The difficulty in contacting the facilitators is  
21 consistent with the sheer number of SMS sent to each facilitator (see Table 3). These  
22 communication problems were also extremely frequent between the facilitators and the  
23 receivers. In fact, not having a mobile phone was often a reason for giving up on trying to  
24 organize an activity with a receiver. This happened to at least three facilitators.

#### 25 26 *Increased need for support*

27 Related to the organizational issues mentioned above, a general finding is that even more  
28 support would be necessary to facilitate implementation at several levels of the peer  
29 intervention. Two facilitators expressed the need for help organising activities, even though 1  
30 had managed to implement 3 activities. More specific help for the initial meeting with the  
31 receivers was also mentioned by 4 facilitators. This finding is consistent with the result that  
32 knowing the receivers to contact, at least by sight, greatly enhanced the success of facilitators.  
33 Indeed, knowing the receiver by sight was the case of all the facilitators having managed to  
34 implement an activity.

#### 35 36 *Motivation issues*

37 The motivation of the facilitators fluctuated throughout the programme. Facilitators got  
38 frustrated when they were not able to organize an activity or when they felt that the receivers  
39 were not very motivated. The lack of motivation of the receivers manifested itself in several  
40 ways. Six facilitators experienced not receiving an answer from a receiver or a receiver not  
41 turning up to the planned activity, although the latter only happened once. Generally, all  
42 facilitators were confronted with some receivers not being very motivated and this was  
43 evidenced in all types of process data. For some receivers, the peer intervention was rejected  
44 because it belonged to the wider PRALIMAP-INÈS programme which they had decided not to  
45 participate in.

#### 46 47 *Programme clarity*

48 A main implementation point to improve is programme clarity in terms of the role of being a  
49 facilitator on the one hand, and links with the broader PRALIMAP-INÈS programme on the  
50 other. For example, the selection of receivers was perceived as unclear and nearly half of the  
51 facilitators spontaneously mentioned this lack of understanding at the end of the peer  
52 intervention despite it being mentioned during the training session. This reflects a gap in the  
53 perception of intervention necessity as acknowledged by a professional as opposed to the  
54 facilitators.

1  
2  
3 A related point of confusion is the link between the peer intervention and the wider PRALIMAP-  
4 INÈS programme. For example, several facilitators thought that through the peer intervention  
5 they would gain knowledge on diet and physical activity indirectly. Some also described the  
6 peer intervention as not really part of the wider programme, which was likely perceived as  
7 more formal as it was delivered by health professionals and with a clearer educational focus.  
8 Furthermore, several admitted that although they were happy being a facilitator, they would  
9 probably not have accepted being a receiver.

10  
11 The training session specifically did not provide information on diet and physical activity to  
12 facilitators as this information was imparted directly to participating adolescents, who were  
13 also the potential receivers, throughout the rest of the PRALIMAP-INÈS programme.  
14 Nevertheless, some facilitators took the initiative of talking about diet and physical activity with  
15 their receivers and others, on the contrary, did not consider it to be part of their role. This point  
16 merits further specification during the training session.

### 17 *Health problems*

18  
19 Another unexpected finding was the number of health problems experienced by the facilitators.  
20 All but 2 facilitators reported small health problems throughout the year, sometimes with the  
21 consequence of having to delay or re-plan an activity. For 4 facilitators, the health problems  
22 were significant enough to have to either completely give up on their role as a facilitator, or rule  
23 out a large range of activities. For example: tendinitis stopped one facilitator from doing any  
24 physical activity for several months, one potential facilitator did not continue after the training  
25 session since she had to undergo a double knee surgery, one facilitator had a severe epilepsy  
26 attack so was cautioned against physical activity and one had to quit following an ice-skating  
27 accident.

### 28 *Interpersonal skills*

29  
30 In terms of specific difficulties, it is clear that one facilitator in middle school had great difficulty  
31 with the role, not feeling comfortable especially in terms of social relations: she asked to change  
32 her receiver because she was afraid he had feelings for her and then asked to be able to carry  
33 out the activity with her own friends as well. In general, interpersonal skills were a common  
34 issue and this finding suggests more specific training in interpersonal skills may be necessary.

35  
36 Another unforeseen difficulty linked to the social context of the intervention was having several  
37 facilitators in the same school. This had initially been considered to be a motivating factor and  
38 was initially perceived as such by the facilitators concerned. However, in practice this  
39 complicated further the organizational task and actually delayed several activities being  
40 organized which impacted the motivation of some facilitators.

### 41 *Good practice*

42  
43  
44 In general and consistent with the implementation challenges identified above, supporting  
45 elements for successfully carrying out the role of facilitator, and evidenced principally in the  
46 telephone notes, were being proactive and having lots of ideas, having free time and living close  
47 to the receivers.

48  
49 Furthermore, several programme components seemed to facilitate implementation. In general,  
50 contact between the programme coordinator and the facilitators was perceived as very positive.  
51 Adolescents appreciated the procedure of first sending an SMS in order to agree on a time for a  
52 call, even though this was quite time consuming (see Table 3). The phone calls were very clearly  
53 experienced as motivating for all facilitators, whether they had been successful in their tasks or  
54 not. Overall, it can be stated that communicating via SMS is appreciated by adolescents, both  
55 with the coordinator but also with the receivers. It is however important to acknowledge the  
56 fact that the adolescents, even the most reliable ones, can be unreachable for various reasons. It  
57

1  
2  
3 was therefore essential to have several means of contacting them. An additional possibility  
4 would be for the coordinator to contact the schools directly when there seems to be a  
5 communication problem.

6 When supportive of the programme, schools can be an important facilitating component to  
7 implementation. For example, some schools successfully organized the meeting between  
8 facilitators and potential receivers and one school nurse helped with selecting a receiver for a  
9 facilitator for whom previous contact with receivers had been unsuccessful.

10  
11 A mixed finding was the support of parents. Although some facilitators seemed to share very  
12 little of their facilitator activities with their parents, despite sometimes being very successful,  
13 for others their parents were clearly very supportive and for three facilitators, parents had an  
14 active role in the implementation of the activities.

15  
16 For ambassadors, a consistent finding is that they agreed to become facilitators because they  
17 liked participating in the PRALIMAP-INÈS programme the previous year. For all facilitators, it is  
18 clear that once they agreed to continue beyond the initial training session, they were motivated  
19 and committed to the PRALIMAP-INÈS programme in general, they actively and informally  
20 promoted the programme to family, peers and friends, without this being specified in their role.

### 21 Receiver views

22  
23 Of the 6 potential receivers interviewed, 2 had carried out an activity of which 1 girl and 1 boy.  
24 Two girls can be considered passive receivers as they say they would have participated but  
25 don't remember being offered any activities by a facilitator and the 2 boys can be considered  
26 reluctant receivers as they clearly expressed their misgiving regarding the peer intervention.  
27 The most illustrative quotes from the different types of material analysed are presented in  
28 Supplementary file 4.

### 29 Social environment

30  
31 It can be noted that family problems were very frequently reported amongst the receivers and  
32 some seemed to have important household responsibilities. In terms of the broader  
33 environment in high school, views were mixed. Boys generally said they appreciated the school  
34 environment, especially those who were full boarders, but girls seemed less at ease. To a large  
35 extent, the appreciation of the school environment depended on the relationship with peers. For  
36 all adolescents, peers are important in order to laugh, talk and relax. However, a distinction is  
37 made about what is a real friend, which entails the crucial element of trust and being able to  
38 count on the person. What is very present in the description of friendship for all of the  
39 adolescents is the notion of proximity in terms of being in the same place and seeing each other  
40 frequently. This notion of proximity means that for the majority, they seem closer to their new  
41 friends in high school than their childhood friends. For some, age proximity is also important

42  
43 In terms of number of friends, adolescent profiles were quite different. Two adolescents, a boy  
44 and a girl, were clearly very sociable and reported a large group of real friends. The others,  
45 including both active receivers, admitted having few close friends. Two reported just staying  
46 with a preferred best friend and the other two described a small group of 2-4 friends. For the  
47 majority, there seemed to be a general mistrust of peers and feeling of isolation. Some  
48 adolescents attributed their feeling of social exclusion to their overweight status.

### 49 Health and overweight

50  
51 For the majority of adolescents, health was defined as the absence of disease but also feeling in  
52 good shape. Public health norms of healthy eating and exercising were also understood and  
53 commonly mentioned. Interestingly, for two boys, health also included not being overweight.

1  
2  
3 For the majority of adolescents, being overweight was principally defined by referring to  
4 physical appearance and was directly linked to not feeling good about oneself. In fact, all but one  
5 adolescent interviewed expressed wanting to lose weight and reported attempts in that  
6 direction, even if this was mentioned indirectly.

7  
8 However, many expressed that healthy behaviour was difficult and this was particularly well  
9 illustrated by the fact that all adolescents but one reported that they frequently ate in a fast food  
10 restaurant. It is also noticeable that what was particularly experienced as difficult was  
11 controlling what one eats. However, physical activity seemed to be something that was  
12 appreciated by the majority of adolescents.

### 13 *Programme experience*

14  
15 The two adolescents who were active receivers were also those who enjoyed the wider  
16 PRALIMAP-INÈS programme. They found it fun and felt they were given good advice and that it  
17 was helpful for behaviour change. The others went to at least one activity to try it but did not  
18 really understand the programme and found it uninteresting.

19  
20 Similarly to the facilitators, there was an overall lack of clarity as regards the peer intervention.  
21 In fact, 3 receivers did not remember being contacted for a peer intervention. Interestingly, not  
22 knowing the facilitator in advance only seemed to be a problem for 2 of the adolescents  
23 interviewed, one of whom was actually an active receiver. It seems that the others would have  
24 been quite open to the peer activities had they understood what it entailed. Only one adolescent  
25 boy was firmly against the peer intervention but could not explain why.

26  
27 The receivers that had benefited from a weight-control activity with a facilitator expressed  
28 enjoying the activities, especially the social component for the receiver who did not know the  
29 facilitator beforehand. In fact, it is interesting that the relationship continued beyond the peer  
30 intervention.

## 31 **DISCUSSION**

32  
33 The intervention was implemented with a sufficient number of participants in order to provide  
34 recommendations as to the feasibility of the intervention in terms of demand, acceptability,  
35 implementation and practicality.

### 36 **Demand and Acceptability**

37  
38 A specific difficulty identified by a review of interventions for the prevention of obesity in  
39 adolescents was targeting interventions to a heterogeneous group[40] and it has previously  
40 been shown that even though adolescents generally want to be more active, there is much intra-  
41 individual variation in what, where, when and with whom, suggesting that tailored activity  
42 promotion would be ideal[41]. The wide range of profiles of the receivers in the present study  
43 are in line with this finding and highlights the potential advantage of implementing weight-  
44 control activities in peer dyads. Generally, although it can be said that the school setting allows  
45 all adolescents to be reached by health interventions equally, it is noteworthy that none of the  
46 peer weight-control activities were carried out in the school and the results of the interviews  
47 with the receivers confirm that for many, the school context is not favourable to feeling at ease  
48 given the general mistrust of peers. Indeed, the school setting can have a negative impact on the  
49 self-appraisal of overweight students through its normative structure[42], conducting peer  
50 activities in a new environment may be more conducive to positive self-appraisal. This result  
51 suggests that health programmes taking place in the school setting could use a peer intervention  
52 component to reach adolescents which may not otherwise participate on the school premises.  
53 The opportunity of reaching otherwise hard-to-reach adolescents with a peer intervention is  
54 also supported by the finding that the receivers who accepted the peer intervention had a  
55  
56  
57

1  
2  
3 higher BMI on average than those who refused. Furthermore, all of the interviews carried out  
4 with receivers confirm that these adolescents wish to lose weight but find it difficult. It  
5 therefore seems that there is a real added-value to peer interventions aimed at overweight  
6 adolescents of low socioeconomic status.

7  
8 The acceptance rate of the receivers seems sufficiently high to suggest satisfactory demand and  
9 acceptability of the programme, especially since they were more readily convinced to  
10 participate in the intervention when it was offered by a peer as opposed to a health  
11 professional. However, the acceptance rate and reach of the peer intervention could certainly be  
12 greatly improved in several ways. An unexpected finding was the widespread mistrust of peers  
13 in general. In fact, Puhl and colleagues[43] found that although peers were generally sought  
14 agents for support relative to parents, teachers or health professionals, they were also those  
15 who aroused most uncertainty with nearly a quarter of adolescents unsure if they wanted their  
16 peers to intervene. Given the general mistrust of same age peers of the receivers on the one  
17 hand, and the difficulty of the facilitators to contact the receivers on the other, a key  
18 improvement point would be for the coordinator to organise a joint meeting between the  
19 facilitators and receivers shortly after them having accepted the intervention. This would enable  
20 the dyad to get to know one another and would also be an opportunity to clarify what the peer  
21 intervention entails and the links with the broader health programme and perhaps even plan  
22 together the first activity for the receiver and facilitator to carry out. Another improvement  
23 point which concerns both the receivers and facilitators is to multiply the contact modes  
24 available to reach them, ideally also liaising with the school for this to be possible.

25  
26 In their synthesis of reviews, Khambalia and colleagues[1] recommend individualizing  
27 interventions to particular student characteristics, particularly with regard to gender. Similar to  
28 other interventions, the present study had a gender bias in terms of peer interveners. The  
29 difficulty in encouraging boys to volunteer has widely been acknowledged[6,44,45]. It is likely  
30 that a strategy solely based on altruistic volunteering is more appealing to girls considering the  
31 societal feminine-associated gender role of caregiving [46]. Other strategies may be necessary  
32 to specifically motivate boys. One possibility would be to create a more competitive  
33 environment, such as is currently being developed in some peer interventions [41]. It would  
34 also be important to conduct interviews with less advantaged adolescent high school boys in  
35 order to understand which types of incentives are more engaging in this target group.

### 36 37 **Implementation and Practicality**

38 The results of the present study point to several improvements that could enhance the  
39 feasibility of a peer intervention based on the implementation of weight-control activities  
40 among less advantaged adolescents. In terms of the facilitators, contrary to expectations, it  
41 seems that entrepreneurs seem a better target than ambassadors. Indeed, although younger and  
42 less easily convinced to take on the role initially (69% refusal rate), they were by far the most  
43 successful facilitators. One reason could be that ambassadors have more academic pressure,  
44 being a year above and having state exams at the end of the year, which was not the case of the  
45 entrepreneurs. In France, students have national exams in 3ème (grade 9), the last year of  
46 middle-school when adolescents are 14-15, but then also in the last two years of high school  
47 when adolescents are 16 to 18 (grades 11 and 12). An inherent problem with the school setting  
48 is that, although health topics and transferable skill development are considered important  
49 cross-curricular themes, health and education agendas are often in competition with priority  
50 being given to core subjects[3,6,47,48]. A running question amongst peer education  
51 implemented in schools is the compatibility with students school commitments, especially  
52 national exams[48,49]. Having less academic pressure may also explain the higher  
53 communicational activity of the entrepreneurs. Furthermore, the entrepreneurs seemed  
54 generally to be in better health, which is conducive to finding energy for the role of facilitator  
55 and being a positive role model.



1  
2  
3 The dose of support received by the facilitators throughout the school year seems appropriate  
4 from their point of view, but is time consuming for the coordinator. This process could be  
5 improved since a very large portion of SMS exchanges were used for planning purposes,  
6 especially agreeing on a time to have more in-depth discussions through phone calls. A more  
7 time-efficient strategy may therefore be to have a contact person in the schools, and a regular  
8 weekly or bi-weekly planned meeting according to the individual facilitators' timetables. In this  
9 scenario, SMS use would shift to a more supportive function: encouraging the facilitators,  
10 checking things are going as planned and prompts for the planned meetings. This would also  
11 counteract some of the contact issues (changing phone number, lack of credit, broken phone  
12 etc.).

13  
14 Results of this study also suggest facilitators may need longer than a 2-hour training session,  
15 even if they are not expected to transmit information on diet and physical activity. The training  
16 session would particularly benefit from three additions. First, increased time spent clarifying  
17 the role of the facilitator and the link with the broader health programme seems necessary.  
18 Second, it seems important to give facilitators practical ideas based on the local facilities which  
19 should have been previously contacted so that the facilitators can reach a contact person for  
20 these activities if they are interested. Indeed, the result that walking was the most popular  
21 activity carried out is likely due to the fact that it was perceived as the simplest, not requiring  
22 any equipment whatsoever. Walking could therefore be considered the best practice activity to  
23 be suggested as the first to be carried out, to put facilitators and receivers at ease. However, it  
24 was clear from multiple exchanges with the facilitators that they would have happily engaged in  
25 many other types of activity had the opportunity arisen. Another possibility would be to create  
26 more supportive environments within the school setting, for example by making it easier for  
27 facilitators and receivers to make use of existing sports facilities, which often require  
28 paperwork and adult supervision. This would require increased engagement from the school  
29 staff which would have to be promoted prior to the start of the program by involving key  
30 stakeholders in tailoring the peer intervention to the particular constraints of each school.  
31 Third, it may be important to provide specific training of interpersonal skills. The idea of  
32 providing more specific skills training for social support has been previously reported[20].  
33

34 The main improvement point is to facilitate the implementation of activities for the facilitators.  
35 Generally, our findings concur with the two main types of time-constraints highlighted in other  
36 peer-led programmes: constraints linked to the implementation setting such as, for the school  
37 setting, exams or internships and constraints linked to the peers themselves such as family  
38 obligations, different timetables or residence location[6]. Constraints due to the peers  
39 themselves may be even more significant when working with less advantaged adolescents, as  
40 can be illustrated by the many family problems revealed during the interviews with receivers.  
41 Although there is evidence for an association between parental socioeconomic status and  
42 adolescents' physical activity and dietary behaviours [50,51], the many reported family  
43 problems make it unlikely that parental involvement would enhance the efficiency of the  
44 present intervention at high school level.  
45

46 It seems that the main logistical modification that can be made is to match facilitators and  
47 receivers based on place of residence. This is especially true since most activities were carried  
48 out outside of the school week. Although the school environment has many advantages, it has  
49 been noted that some facilities may not be readily available for weight-control activities such as  
50 facilities for food preparation and consumption[52]. This was also noted in the current study.  
51 The initial assumption that peer facilitators would be able to use school facilities was never put  
52 into practice. One main reason may explain this finding on top of the lack of facilities: the  
53 organisational burden in order to use the facilities. Another reason could be the strict health and  
54 safety regulations of the school setting. An additional advantage of implementing a peer  
55 intervention programme is the fact that if the adolescents live close enough, their activities can  
56 continue during the holidays. The summer holidays have been highlighted as a potentially  
57

important period of weight gain for adolescents, especially for overweight children and adolescents and ethnic minority groups[53].

Another recommendation would be to encourage carrying out, at least at first, activities based on physical activity rather than healthy eating as this has the most potential to engage adolescents and activities in dyads rather than groups, since this is easier to organize. Although allowing people to be with their friends in order to engage in physical activity has been recognised as a key lever for behaviour change[41], in practice it is difficult to create meaningful peer relations. In fact, although the peer-led activities were originally conceived as group activities, in practice peer interveners were only able to implement weight-control activities in pairs. This could be due to timetable clashes but also perhaps the fact that with unfamiliar peers it is easier to gain each other's trust in pairs.

### Strengths and limitations

Although some interventions have previously used peer education to specifically target disadvantaged children and adolescents[54], to our knowledge this is the first intervention to purposefully select peer facilitators based on socioeconomic status. The peer intervention was embedded in a large-scale research study which allowed systematic collection of data in all state run high schools in the Vosges area in France as well as some volunteer middle schools totalling 33 schools. This allows conclusions to be drawn about selection procedures of facilitators and receivers as well as the acceptability of the peer intervention. Furthermore, an in-depth process analysis with different sources of qualitative material was carried out in order to triangulate findings and inform practice as to the feasibility of the peer intervention. Limits of the present study relate to the small sample sizes of the facilitators and receivers. As a result, no statistical conclusions can be drawn with confidence as regards, first, the characteristics of the participants and, second, the impact of the peer intervention on the diet and physical activity behaviour of the receivers. However, the peer intervention was purposefully designed as a feasibility study given the innovative selection of facilitators. With a larger sample size, further research should aim to measure the health benefits to the receivers and the cost of the intervention. It would also be important to empirically establish the added value of selecting peer facilitators matched on receiver socioeconomic status. Furthermore, the benefits of selecting less advantaged facilitators should also be assessed as regards the potential empowerment of more vulnerable adolescents by encouraging them to take an active part in health programmes.

### Contributors

LS conceived and coordinated the intervention. SB, KL, JL, LM, AYO, RdL and EL participated in the intervention design and implementation. JK participated in the conception of the focus groups and interviews. LS and SR conducted focus groups and interviews and LS conducted qualitative analyses. LS and SB conceived and drafted the manuscript with input from all members of the authorship team. SB coordinated the overall study. CA performed quantitative analyses. KL, CA, SR, JL, LM, AYO, RdL, JK and EL also reviewed the manuscript and contributed important intellectual content. All authors approve the final manuscript. Members of the PRALIMAP-INÈS trial group (PI) contributed by giving feedback during intervention implementation.

### Acknowledgements

Many people worked together to make a success of the PRALIMAP-INÈS trial and have been listed in the design, methods, and rationale paper. We would like to express our gratitude to the participating students, parents, and professionals in the participating schools.

## Funding statement

This work was supported by the French National Cancer Institute (INCA), a public institute, grant number 2011-239. The work of LS was supported by the University of Lorraine (PhD grant).

## Competing interests

We have read and understood BMJ policy on declaration of interests and declare that we have no competing interests.

## Patient consent

Obtained

## Ethics approval

As an integral part of the PRALIMAP-INES trial (registered at ClinicalTrials.gov NCT01688453), ethics approval was obtained from the French consultative committee for treatment of information in health and research (no. 12.299), the French national commission for Data Protection and Liberties (no. 912372) and the French Persons Protection Committee (no. 2012/15).

## Data sharing statement

No additional data are available

## Figure legends

Figure 1: Recruitment process of the facilitators (ambassadors and entrepreneurs)

Figure 2: Interest and participation of the receivers

## References

- 1 Khambalia AZ, Dickinson S, Hardy LL, *et al.* A synthesis of existing systematic reviews and meta-analyses of school-based behavioural interventions for controlling and preventing obesity. *Obes Rev* 2012;**13**:214–233. doi:10.1111/j.1467-789X.2011.00947.x
- 2 Ayliffe B, Glanville NT. Achieving healthy body weight in teenagers: evidence-based practice guidelines for community nutrition interventions. *Can J Diet Pract Res Publ Dietit Can Rev Can Prat Rech En Diet Une Publ Diet Can* 2010;**71**:e78-86.
- 3 Langford R, Bonell C, Jones H, *et al.* The World Health Organization's Health Promoting Schools framework: a Cochrane systematic review and meta-analysis. *Bmc Public Health* 2015;**15**:130. doi:10.1186/s12889-015-1360-y
- 4 Amini M, Djazayeri A, Majdzadeh R, *et al.* Effect of School-based Interventions to Control Childhood Obesity: A Review of Reviews. *Int J Prev Med* 2015;**6**:68. doi:10.4103/2008-7802.162059
- 5 Lee H, Harris KM, Lee J. Multiple Levels of Social Disadvantage and Links to Obesity in Adolescence and Young Adulthood. *J Sch Health* 2013;**83**:139–149. doi:10.1111/josh.12009

- 1  
2  
3 6 Le Grand E. « ESPAIR » Rapport d'évaluation. Paris: : Ministère des Sports, de la Jeunesse, de  
4 l'Education populaire et de la Vie associative Fonds d'Expérimentation pour la Jeunesse 2012.  
5  
6 7 Roseman MG, Riddell MC, Haynes JN. A content analysis of kindergarten-12th grade school-  
7 based nutrition interventions: taking advantage of past learning. *J Nutr Educ Behav* 2011;**43**:2-  
8 18. doi:10.1016/j.jneb.2010.07.009  
9  
10 8 Amsellem-Mainguy Y. Qu'entend-on par « éducation pour la santé par les pairs » ? *Cah L'action*  
11 2016;;9-16.  
12  
13 9 Langlois J, Omorou AY, Vuillemin A, *et al.* Association of socioeconomic, school-related and  
14 family factors and physical activity and sedentary behaviour among adolescents: multilevel  
15 analysis of the PRALIMAP trial inclusion data. *BMC Public Health* 2017;**17**:175.  
16 doi:10.1186/s12889-017-4070-9  
17  
18 10 Sawka KJ, McCormack GR, Nettel-Aguirre A, *et al.* Friendship networks and physical activity and  
19 sedentary behavior among youth: a systematized review. *Int J Behav Nutr Phys Act* 2013;**10**:130.  
20 doi:10.1186/1479-5868-10-130  
21  
22 11 Salvy S-J, de la Haye K, Bowker JC, *et al.* Influence of peers and friends on children's and  
23 adolescents' eating and activity behaviors. *Physiol Behav* 2012;**106**:369-78.  
24 doi:10.1016/j.physbeh.2012.03.022  
25  
26 12 Abdi F, Simbar M. The Peer Education Approach in Adolescents- Narrative Review Article. *Iran J*  
27 *Public Health* 2013;**42**:1200-6.  
28  
29 13 Azizi M, Hamzehgardeshi Z, Shahhosseini Z. Influential Factors for the Improvement of Peer  
30 Education in Adolescents: A Narrative Review. *J Pediatr Rev* 2017;**5**:e7692. doi:10.17795/jpr-  
31 7692  
32  
33 14 Villa-Torres L, Svanemyr J. Ensuring Youth's Right to Participation and Promotion of Youth  
34 Leadership in the Development of Sexual and Reproductive Health Policies and Programs. *J*  
35 *Adolesc Health* 2015;**56**:S51-7. doi:10.1016/j.jadohealth.2014.07.022  
36  
37 15 Ayaz S, Acil D. Comparison of Peer Education and the Classic Training Method for School Aged  
38 Children Regarding Smoking and its Dangers. *J Pediatr Nurs-Nurs Care Child Fam* 2015;**30**:E3-12.  
39 doi:10.1016/j.pedn.2014.11.009  
40  
41 16 MacArthur GJ, Harrison S, Caldwell DM, *et al.* Peer-led interventions to prevent tobacco, alcohol  
42 and/or drug use among young people aged 11-21years: a systematic review and meta-analysis.  
43 *Addiction* 2016;**111**:391-407. doi:10.1111/add.13224  
44  
45 17 Cui Z, Shah S, Yan L, *et al.* Effect of a school-based peer education intervention on physical  
46 activity and sedentary behaviour in Chinese adolescents: a pilot study. *BMJ Open*  
47 2012;**2**:e000721. doi:10.1136/bmjopen-2011-000721  
48  
49 18 El Rayess F, Gandhi M, Mennillo H. Mark, Set, Go! School-Based Nutrition and Physical Activity  
50 Program: A Five-Year Evaluation. *R I Med J* 2013 2017;**100**:39-44.  
51  
52 19 Ishak SIZS, Chin YS, Taib MNM, *et al.* School-based intervention to prevent overweight and  
53 disordered eating in secondary school Malaysian adolescents: a study protocol. *Bmc Public*  
54 *Health* 2016;**16**:1101. doi:10.1186/s12889-016-3773-7  
55  
56  
57  
58  
59  
60

- 1  
2  
3 20 Kulik NL, Fisher EB, Ward DS, *et al.* Peer support enhanced social support in adolescent females  
4 during weight loss. *Am J Health Behav* 2014;**38**:789–800. doi:10.5993/AJHB.38.5.16  
5  
6 21 Lloyd-Richardson EE, Jelalian E, Sato AF, *et al.* Two-year follow-up of an adolescent behavioral  
7 weight control intervention. *Pediatrics* 2012;**130**:e281–288. doi:10.1542/peds.2011-3283  
8  
9 22 McKinney C, Bishop V, Cabrera K, *et al.* NuFit: nutrition and fitness CBPR program evaluation. *J*  
10 *Prev Interv Community* 2014;**42**:112–24. doi:10.1080/10852352.2014.881180  
11  
12 23 Santos RG, Durksen A, Rabbanni R, *et al.* Effectiveness of peer-based healthy living lesson plans  
13 on anthropometric measures and physical activity in elementary school students: a cluster  
14 randomized trial. *JAMA Pediatr* 2014;**168**:330–7. doi:10.1001/jamapediatrics.2013.3688  
15  
16 24 Ladapo JA, Bogart LM, Klein DJ, *et al.* Cost and Cost-Effectiveness of Students for Nutrition and  
17 eXercise (SNaX). *Acad Pediatr* 2016;**16**:247–53. doi:10.1016/j.acap.2015.07.009  
18  
19 25 Chandra-Mouli V, Lane C, Wong S. What Does Not Work in Adolescent Sexual and Reproductive  
20 Health: A Review of Evidence on Interventions Commonly Accepted as Best Practices. *Glob*  
21 *Health-Sci Pract* 2015;**3**:333–40. doi:10.9745/GHSP-D-15-00126  
22  
23 26 Harden A, Oakley A, Oliver S. Peer-delivered health promotion for young people: A systematic  
24 review of different study designs. *Health Educ J* 2001;**60**:339–53.  
25 doi:10.1177/001789690106000406  
26  
27 27 Bandura A. *Social Foundations of Thought & Action, a Social Cognitive Theory*. First Printing  
28 edition. Prentice Hall 1986.  
29  
30 28 Bagnall A-M, South J, Hulme C, *et al.* A systematic review of the effectiveness and cost-  
31 effectiveness of peer education and peer support in prisons. *BMC Public Health* 2015;**15**:290.  
32 doi:10.1186/s12889-015-1584-x  
33  
34 29 Bowen DJ, Kreuter M, Spring B, *et al.* How We Design Feasibility Studies. *Am J Prev Med*  
35 2009;**36**:452–7. doi:10.1016/j.amepre.2009.02.002  
36  
37 30 Legrand K, Lecomte E, Langlois J, *et al.* Reducing social inequalities in access to overweight and  
38 obesity care management for adolescents: The PRALIMAP-INÈS trial protocol and inclusion data  
39 analysis. *Contemp Clin Trials Commun* 2017;**7**:141–57. doi:10.1016/j.conctc.2017.05.010  
40  
41 31 Cole TJ, Bellizzi MC, Flegal KM, *et al.* Establishing a standard definition for child overweight and  
42 obesity worldwide: international survey. *Br Med J* 2000;**320**:1240–3.  
43 doi:10.1136/bmj.320.7244.1240  
44  
45 32 McCarthy HD, Jarrett KV, Crawley HF. The development of waist circumference percentiles in  
46 British children aged 5.0–16.9 y. *Eur J Clin Nutr* 2001;**55**:902–7. doi:10.1038/sj.ejcn.1601240  
47  
48 33 Currie CE, Elton RA, Todd J, *et al.* Indicators of socioeconomic status for adolescents: the WHO  
49 Health Behaviour in School-aged Children Survey. *Health Educ Res* 1997;**12**:385–97.  
50 doi:10.1093/her/12.3.385  
51  
52 34 Boyce W, Torsheim T, Currie C, *et al.* The Family Affluence Scale as a Measure of National  
53 Wealth: Validation of an Adolescent Self-Report Measure. *Soc Indic Res* 2006;**78**:473–87.  
54 doi:10.1007/s11205-005-1607-6  
55  
56  
57  
58  
59

- 1  
2  
3 35 Craig CL, Marshall AL, Sjöström M, *et al.* International physical activity questionnaire: 12-country  
4 reliability and validity. *Med Sci Sports Exerc* 2003;**35**:1381–95.  
5 doi:10.1249/01.MSS.0000078924.61453.FB  
6
- 7 36 Garner DM, Garfinkel PE. The Eating Attitudes Test: an index of the symptoms of anorexia  
8 nervosa. *Psychol Med* 1979;**9**:273–9.  
9
- 10 37 Haines J, Ziyadeh NJ, Franko DL, *et al.* Screening high school students for eating disorders:  
11 validity of brief behavioral and attitudinal measures. *J Sch Health* 2011;**81**:530–5.  
12 doi:10.1111/j.1746-1561.2011.00623.x  
13
- 14 38 Zigmond AS, Snaith RP. The hospital anxiety and depression scale. *Acta Psychiatr Scand*  
15 1983;**67**:361–70.  
16
- 17 39 Ravens-Sieberer U, Erhart M, Rajmil L, *et al.* Reliability, construct and criterion validity of the  
18 KIDSCREEN-10 score: a short measure for children and adolescents' well-being and health-  
19 related quality of life. *Qual Life Res Int J Qual Life Asp Treat Care Rehabil* 2010;**19**:1487–500.  
20 doi:10.1007/s11136-010-9706-5  
21
- 22 40 Doak CM, Visscher TLS, Renders CM, *et al.* The prevention of overweight and obesity in children  
23 and adolescents: a review of interventions and programmes. *Obes Rev* 2006;**7**:111–136.  
24 doi:10.1111/j.1467-789X.2006.00234.x  
25
- 26 41 Corder K, Schiff A, Kesten JM, *et al.* Development of a universal approach to increase physical  
27 activity among adolescents: The GoActive Intervention. Published Online First: 25 August 2015.  
28 doi:http://dx.doi.org/10.1136/bmjopen-2015-008610  
29
- 30 42 Crosnoe R, Muller C. Body mass index, academic achievement, and school context: examining  
31 the educational experiences of adolescents at risk of obesity. *J Health Soc Behav* 2004;**45**:393–  
32 407. doi:10.1177/002214650404500403  
33
- 34 43 Puhl RM, Peterson JL, Luedicke J. Strategies to address weight-based victimization: youths'  
35 preferred support interventions from classmates, teachers, and parents. *J Youth Adolesc*  
36 2013;**42**:315–27. doi:10.1007/s10964-012-9849-5  
37
- 38 44 Grand ÉL. Professionnaliser les pairs-éducateurs est-il nécessaire ? *Cah L'action* 2016;:75–82.  
39
- 40 45 Strange V, Forrest S, Oakley A. Peer-led sex education—characteristics of peer educators and  
41 their perceptions of the impact on them of participation in a peer education programme. *Health*  
42 *Educ Res* 2002;**17**:327–37. doi:10.1093/her/17.3.327  
43
- 44 46 Karniol R, Grosz E, Schorr I. Caring, Gender Role Orientation, and Volunteering. *Sex Roles*  
45 2003;**49**:11–9. doi:10.1023/A:1023953401662  
46
- 47 47 Langford R, Bonell C, Jones H, *et al.* Obesity prevention and the Health promoting Schools  
48 framework: essential components and barriers to success. *Int J Behav Nutr Phys Act* 2015;**12**:15.  
49 doi:10.1186/s12966-015-0167-7  
50
- 51 48 Audrey S, Holliday J, Campbell R. Commitment and compatibility: Teachers' perspectives on the  
52 implementation of an effective school-based, peer-led smoking intervention. *Health Educ J*  
53 2008;**67**:74–90. doi:10.1177/0017896908089387  
54  
55  
56  
57  
58  
59  
60

- 1  
2  
3 49 Corder K, Brown HE, Schiff A, *et al.* Feasibility study and pilot cluster-randomised controlled trial  
4 of the GoActive intervention aiming to promote physical activity among adolescents: outcomes  
5 and lessons learnt. *Bmj Open* 2016;**6**:e012335. doi:10.1136/bmjopen-2016-012335  
6  
7 50 Finger JD, Mensink GBM, Banzer W, *et al.* Physical activity, aerobic fitness and parental socio-  
8 economic position among adolescents: the German Health Interview and Examination Survey  
9 for Children and Adolescents 2003–2006 (KiGGS). *Int J Behav Nutr Phys Act* 2014;**11**:43.  
10 doi:10.1186/1479-5868-11-43  
11  
12 51 Finger JD, Varnaccia G, Tylleskär T, *et al.* Dietary behaviour and parental socioeconomic position  
13 among adolescents: the German Health Interview and Examination Survey for Children and  
14 Adolescents 2003–2006 (KiGGS). *BMC Public Health* 2015;**15**:498. doi:10.1186/s12889-015-  
15 1830-2  
16  
17 52 Bell SL, Audrey S, Cooper AR, *et al.* Lessons from a peer-led obesity prevention programme in  
18 English schools. *Health Promot Int* 2014;:dau008. doi:10.1093/heapro/dau008  
19  
20 53 Franckle R, Adler R, Davison K. Accelerated weight gain among children during summer versus  
21 school year and related racial/ethnic disparities: a systematic review. *Prev Chronic Dis*  
22 2014;**11**:E101. doi:10.5888/pcd11.130355  
23  
24 54 Lubans DR, Morgan PJ, Aguiar EJ, *et al.* Randomized controlled trial of the Physical Activity  
25 Leaders (PALs) program for adolescent boys from disadvantaged secondary schools. *Prev Med*  
26 2011;**52**:239–46. doi:10.1016/j.ypmed.2011.01.009  
27  
28  
29  
30  
31  
32  
33  
34  
35  
36  
37  
38  
39  
40  
41  
42  
43  
44  
45  
46  
47  
48  
49  
50  
51  
52  
53  
54  
55  
56  
57  
58  
59  
60

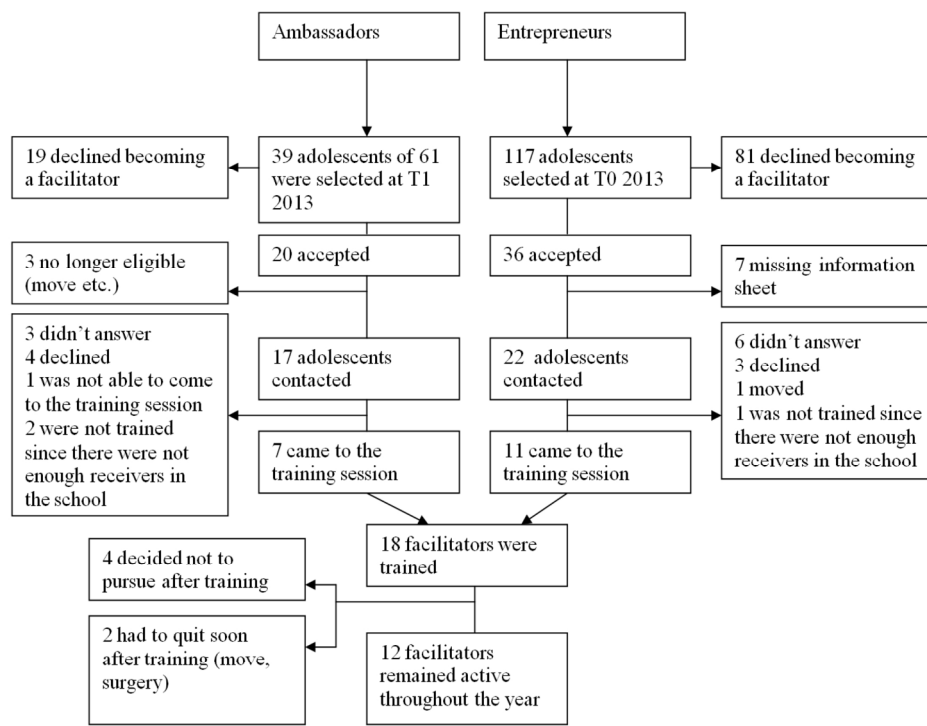

Figure 1: Recruitment process of the facilitators (ambassadors and entrepreneurs)

199x156mm (300 x 300 DPI)



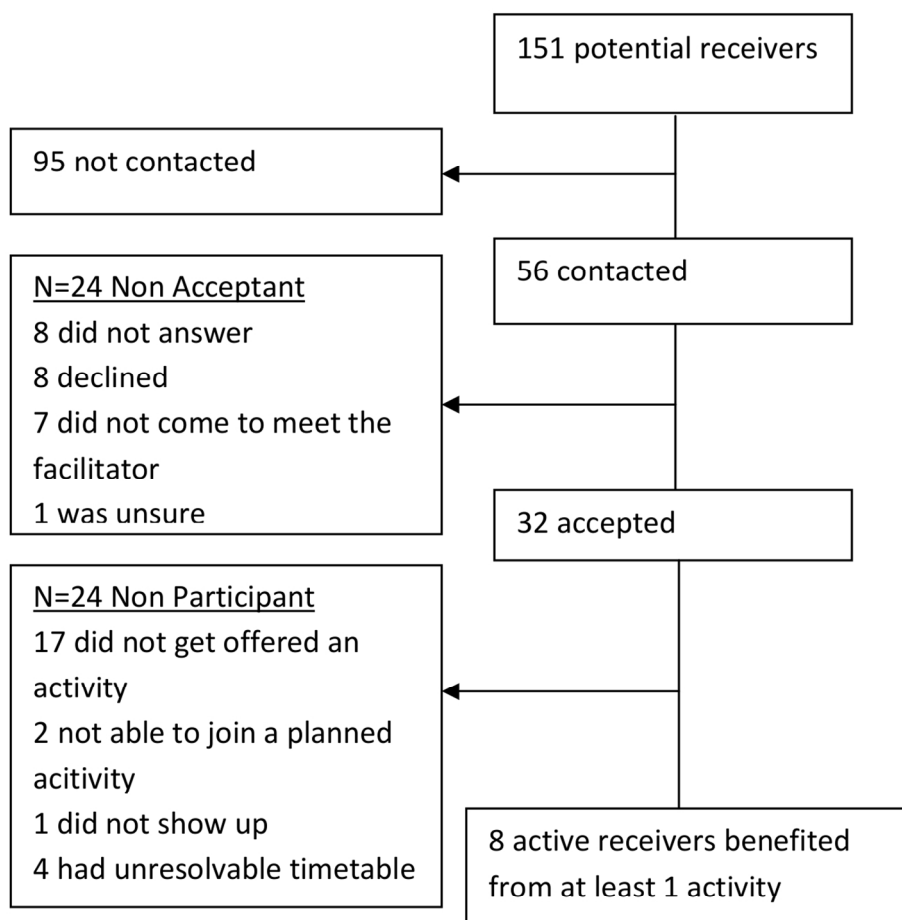

Figure 2: Interest and participation of the receivers

120x125mm (300 x 300 DPI)

Supplementary file 1: Contribution of each source of data collection to assess feasibility questions

| Feasibility criteria | Outcomes of interest              | Screening session | Facilitator training session | Facilitator mid-program interview | Facilitator end-of-program session | Facilitator SMS exchanges | Facilitator Telephone calls | Nutritional activities | Receiver individual interviews |
|----------------------|-----------------------------------|-------------------|------------------------------|-----------------------------------|------------------------------------|---------------------------|-----------------------------|------------------------|--------------------------------|
| Demand               | Expressed interest                | x                 |                              |                                   |                                    |                           |                             |                        | x                              |
|                      | Characteristics                   | x                 |                              |                                   |                                    |                           |                             |                        | x                              |
| Acceptability        | Participation                     |                   | x                            |                                   |                                    |                           |                             | x                      |                                |
|                      | Appropriateness                   |                   | x                            | x                                 | x                                  | x                         | x                           |                        | x                              |
| Implementation       | Satisfaction                      |                   | x                            | x                                 | x                                  |                           |                             |                        | x                              |
|                      | Intervention dose                 |                   |                              |                                   |                                    |                           |                             | x                      |                                |
| Practicality         | Support needed                    |                   |                              |                                   |                                    | x                         | x                           |                        |                                |
|                      | Implementation ease or difficulty |                   | x                            | x                                 | x                                  | x                         | x                           |                        | x                              |

Supplementary file 2: individual characteristics of each facilitator and receiver

|                         | Entrepreneur                          |                                       |                          |                          |               |                                       |               | Ambassadors              |                                       |                          |                          |                          | Active receiver                       |                          |                          |                          |                          |                                       |                          |               |
|-------------------------|---------------------------------------|---------------------------------------|--------------------------|--------------------------|---------------|---------------------------------------|---------------|--------------------------|---------------------------------------|--------------------------|--------------------------|--------------------------|---------------------------------------|--------------------------|--------------------------|--------------------------|--------------------------|---------------------------------------|--------------------------|---------------|
| Student number          | 61142                                 | 61177                                 | 101052                   | 141026                   | 151039        | 191099                                | 241026        | 50011                    | 70016                                 | 150016                   | 210005                   | 210012                   | 61147                                 | 141052                   | 141058                   | 151098                   | 151116                   | 191134                                | 211001                   | 241089        |
| Measurement time point  | T0                                    | T0                                    | T0                       | T0                       | T0            | T0                                    | T0            | T1                       | T1                                    | T1                       | T1                       | T1                       | T0                                    | T0                       | T0                       | T0                       | T0                       | T0                                    | T0                       | T0            |
| Gender                  | Girl                                  | Girl                                  | Girl                     | Boy                      | Boy           | Girl                                  | Girl          | Girl                     | Boy                                   | Boy                      | Girl                     | Girl                     | Girl                                  | Boy                      | Boy                      | Boy                      | Girl                     | Girl                                  | Girl                     | Girl          |
| School type             | General and technological High School | General and technological High School | Professional High School | Professional High School | Middle School | General and technological High School | Middle School | Professional High School | General and technological High School | Professional High School | Professional High School | Professional High School | General and technological High School | Professional High School | Professional High School | Professional High School | Professional High School | General and technological High School | Professional High School | Middle School |
| Exact age               | 15.04                                 | 15.39                                 | 15.94                    | 16.54                    | 13.97         | 15.02                                 | 13.99         | 16.38                    | 15.44                                 | 16.15                    | 16.23                    | 15.77                    | 15.62                                 | 16.58                    | 16.12                    | 17.55                    | 17.41                    | 14.90                                 | 15.87                    | 14.22         |
| BMI                     | 22.49                                 | 19.04                                 | 23.07                    | 25.92                    | 20.06         | 24.31                                 | 21.55         | 27.17                    | 23.70                                 | 27.75                    | 28.98                    | 27.43                    | 23.76                                 | 32.97                    | 25.73                    | 28.99                    | 37.42                    | 24.30                                 | 25.83                    | 31.68         |
| FAS score               | 5                                     | 5                                     | 3                        | 4                        | 3             | 4                                     | 4             | 4                        | 5                                     | 5                        | 5                        | 4                        | 5                                     | 4                        | 2                        | 5                        | 5                        | 4                                     | 4                        | 5             |
| EAT 26 score            | 3.8                                   | 8                                     | 7.6                      | 8.3                      | .             | 12.8                                  | .             | 8.9                      | 15.3                                  | 6.4                      | 29.3                     | 7.6                      | 35.8                                  | 15.3                     | 11.5                     | 2.5                      | 10.2                     | 17.9                                  | 8.9                      | 14.1          |
| HAD score               | 28.57                                 | 9.52                                  | 14.29                    | 14.29                    | 9.52          | 38.10                                 | 11.90         | 19.05                    | 26.19                                 | 16.67                    | 35.71                    | 28.57                    | 42.86                                 | 35.71                    | 35.71                    | 26.19                    | 7.14                     | 21.43                                 | 23.81                    | 35.71         |
| Anxiety score           | 38.10                                 | 19.05                                 | 19.05                    | 23.81                    | .             | 52.38                                 | .             | 28.57                    | 33.33                                 | 14.29                    | 52.38                    | 38.10                    | 61.90                                 | 42.86                    | 52.38                    | 19.05                    | 9.52                     | 33.33                                 | 38.10                    | 52.38         |
| Depression score        | 19.05                                 | 0.00                                  | 9.52                     | 4.76                     | 0.00          | 23.81                                 | 0.00          | 9.52                     | 19.05                                 | 19.05                    | 19.05                    | 19.05                    | 23.81                                 | 28.57                    | 19.05                    | 33.33                    | 4.76                     | 9.52                                  | 9.52                     | 19.05         |
| Physical activity level | Moderate                              | High                                  | High                     | High                     | .             | Low                                   | .             | Low                      | Moderate                              | Low                      | Low                      | Moderate                 | Moderate                              | Moderate                 | High                     | Moderate                 | Moderate                 | Moderate                              | Moderate                 | High          |
| KIDSCREEN score         | 43.35                                 | 55.07                                 | 44.48                    | 43.35                    | 66.86         | 34.70                                 | 48.29         | 59.85                    | 45.67                                 | 46.94                    | 41.24                    | 43.35                    | 41.24                                 | 40.24                    | 48.29                    | 38.34                    | 66.86                    | 46.94                                 | 46.94                    | 48.29         |

## Supplementary file 3 – SMS and Calls

| SMS received      | Plan training | Plan call | Plan interview | Activity feedback | Plan end session | Total SMS sent | Total received | nb contact days | % no answer |
|-------------------|---------------|-----------|----------------|-------------------|------------------|----------------|----------------|-----------------|-------------|
| <b><u>F1</u></b>  | 2             | 69        | 9              | 34                | 25               | 147            | 142            | 54              | 4           |
| <b><u>F2</u></b>  | 1             | 30        | 11             | 46                | 1                | 122            | 108            | 47              | 4           |
| <b><u>F3</u></b>  | 11            | 47        | 3              | 41                | 6                | 140            | 112            | 57              | 9           |
| <b><u>F4</u></b>  | 5             | 59        | 3              | 36                | 44               | 180            | 147            | 67              | 11          |
| <b><u>F5</u></b>  | 0             | 4         | 0              | 5                 | 0                | 24             | 15             | 12              | 29          |
| <b><u>F6</u></b>  | 6             | 25        | 14             | 25                | 3                | 89             | 76             | 43              | 9           |
| <b><u>F7</u></b>  | 4             | 43        | 5              | 29                | 5                | 88             | 92             | 38              | 0           |
| <b><u>F8</u></b>  | 5             | 14        | 6              | 37                | 2                | 88             | 66             | 36              | 14          |
| <b><u>F9</u></b>  | 5             | 21        | 4              | 18                | 6                | 78             | 58             | 42              | 17          |
| <b><u>F10</u></b> | 0             | 21        | 1              | 43                | 9                | 95             | 75             | 41              | 16          |
| <b><u>F11</u></b> | 1             | 6         | 1              | 5                 | 3                | 29             | 16             | 23              | 38          |
| <b><u>F12</u></b> | 1             | 32        | 11             | 30                | 0                | 66             | 83             | 30              | 0           |

Table 3a: Content and number of SMS exchanges between the coordinator and the facilitators

|                   | Missed call | Phone conversations | % missed |
|-------------------|-------------|---------------------|----------|
| <b><u>F1</u></b>  | 2           | 8                   | 20       |
| <b><u>F2</u></b>  | 0           | 12                  | 0        |
| <b><u>F3</u></b>  | 1           | 15                  | 6        |
| <b><u>F4</u></b>  | 3           | 17                  | 15       |
| <b><u>F5</u></b>  | 26          | 5                   | 84       |
| <b><u>F6</u></b>  | 0           | 11                  | 0        |
| <b><u>F7</u></b>  | 0           | 10                  | 0        |
| <b><u>F8</u></b>  | 18          | 4                   | 82       |
| <b><u>F9</u></b>  | 0           | 4                   | 0        |
| <b><u>F10</u></b> | 3           | 10                  | 23       |
| <b><u>F11</u></b> | 26          | 5                   | 84       |
| <b><u>F12</u></b> | 11          | 9                   | 55       |

Table 3b: Number of phone conversations and missed calls between the coordinator and the facilitators

Note: The more successful facilitators are in bold and underlined

Supplementary file 4: illustrative quotes from the facilitators and receivers

\* (vs)= very successful facilitator

\*\*Um/umm indicates hesitation in the discourse

| FACILITATORS                      |                                                  |                        |          |        |                                                                                                                                                                                                                                                                                                                                                                                                                                                                |                                                                                                                                                                                                                                                                                                                                                                                                         |
|-----------------------------------|--------------------------------------------------|------------------------|----------|--------|----------------------------------------------------------------------------------------------------------------------------------------------------------------------------------------------------------------------------------------------------------------------------------------------------------------------------------------------------------------------------------------------------------------------------------------------------------------|---------------------------------------------------------------------------------------------------------------------------------------------------------------------------------------------------------------------------------------------------------------------------------------------------------------------------------------------------------------------------------------------------------|
| Section                           | Main point                                       | Source                 | Person   | Gender | Age                                                                                                                                                                                                                                                                                                                                                                                                                                                            | Quote                                                                                                                                                                                                                                                                                                                                                                                                   |
| Organisational issues             | Time and transport and other logistical problems | Training session       | F6 (vs*) | Girl   | 15.0                                                                                                                                                                                                                                                                                                                                                                                                                                                           | yeah that will more be it I think [activities during the holidays] since honestly during class it's until 6pm Wednesday afternoon we have class also and everything and the weekend either it's to rest or do homework so umm**                                                                                                                                                                         |
|                                   |                                                  | End of program session | F10      | Girl   | 16.0                                                                                                                                                                                                                                                                                                                                                                                                                                                           | well the people I had were residents [boarding school] so um they lived in um [city far away] (...) And like even every time there were teachers that swaped their lesson hours around and things like that so                                                                                                                                                                                          |
|                                   |                                                  | End of program session | F9       | Boy    | 15.4                                                                                                                                                                                                                                                                                                                                                                                                                                                           | I maybe overestimated that time [free time]                                                                                                                                                                                                                                                                                                                                                             |
|                                   |                                                  | End of program session | F3 (vs)  | Girl   | 15.0                                                                                                                                                                                                                                                                                                                                                                                                                                                           | Well what I found difficult was to find um the same date to do an activity with several people                                                                                                                                                                                                                                                                                                          |
|                                   |                                                  | End of program session | F7       | Girl   | 16.4                                                                                                                                                                                                                                                                                                                                                                                                                                                           | Well I called them [receivers] and I explained we talked a good 15min and then um then they told me um it wasn't possible, on Wednesdays they already had activities and there were some that had to keep their little sister too.                                                                                                                                                                      |
|                                   |                                                  | End of program session | F6 (vs)  | Girl   | 15.0                                                                                                                                                                                                                                                                                                                                                                                                                                                           | For [receiver] it was a transport problem timewise honestly you could see that he didn't mind joining in the activity or exercising or anything but it was really umm an organization thing                                                                                                                                                                                                             |
|                                   |                                                  | Telephone notes        | F2       | Girl   | 14.0                                                                                                                                                                                                                                                                                                                                                                                                                                                           | I didn't know it would be so hard. Either I forget. Either it's not possible.                                                                                                                                                                                                                                                                                                                           |
|                                   |                                                  | Mid program interview  | F1 (vs)  | Girl   | 15.8                                                                                                                                                                                                                                                                                                                                                                                                                                                           | Yeah I'll do it tonight because well before I had to revise for mock final exams                                                                                                                                                                                                                                                                                                                        |
|                                   |                                                  | SMS exchange           | F7       | Girl   | 16.4                                                                                                                                                                                                                                                                                                                                                                                                                                                           | well it's not that I don't want to do it anymore but it's tough I will soon have my exam and there are only 2 weeks left of class and [name of receiver] can't the two Wednesdays because she's looking for an internship and on Monday and Tuesday I finish class at 6pm and the other days she can't and during the holidays I can't because I will work so she's ok to do the activity in September. |
|                                   |                                                  | SMS exchange           | F12      | Girl   | 16.2                                                                                                                                                                                                                                                                                                                                                                                                                                                           | Coordinator: So is everything set for an activity next Wednesday?<br>Facilitator : No the sport hall is reserved                                                                                                                                                                                                                                                                                        |
|                                   | Mid program interview                            | F4 (vs)                | Boy      | 14.0   | well I did struggle a bit for exercising with good weather                                                                                                                                                                                                                                                                                                                                                                                                     |                                                                                                                                                                                                                                                                                                                                                                                                         |
|                                   | Contact issues with the coordinator              | End of program session | F10      | Girl   | 16.0                                                                                                                                                                                                                                                                                                                                                                                                                                                           | Yeah because I just didn't receive them for a while the messages. That's why I changed phone.                                                                                                                                                                                                                                                                                                           |
|                                   |                                                  | End of program session | F3 (vs)  | Girl   | 15.0                                                                                                                                                                                                                                                                                                                                                                                                                                                           | well me with my phone when I have a message I answer but well sometimes I just don't receive them                                                                                                                                                                                                                                                                                                       |
|                                   |                                                  | SMS exchange           | F8       | Girl   | 15.4                                                                                                                                                                                                                                                                                                                                                                                                                                                           | Coordinator: Can I call you on a landline?<br>Facilitator: I'm in a social home so the landline is reserved for adults                                                                                                                                                                                                                                                                                  |
| SMS exchange                      |                                                  | F4 (vs)                | Boy      | 14.0   | Facilitator: yes sorry I didn't have enough phone credit to answer                                                                                                                                                                                                                                                                                                                                                                                             |                                                                                                                                                                                                                                                                                                                                                                                                         |
| Contact issues with the receivers | End of program session                           | F3 (vs)                | Girl     | 15.0   | well with [receiver] um since she didn't have any method of communication apart from um anyway it was really complicated                                                                                                                                                                                                                                                                                                                                       |                                                                                                                                                                                                                                                                                                                                                                                                         |
|                                   | SMS exchange                                     | F8                     | Girl     | 15.4   | Hello, I received your calls; I can't answer since I'm in study period, however I changed phone and I therefore don't have the numbers of [receiver 1] and [receiver 2] and since I plan on maybe going running tomorrow or Wednesday that would be easier to warn them by message :)                                                                                                                                                                          |                                                                                                                                                                                                                                                                                                                                                                                                         |
| Need for support                  | End of program session                           | F6 (vs)                | Girl     | 15.0   | Coordinator: so what could have helped you?<br>Facilitator: well for me if everything had been organised for the time the place and the activity then umm see with the others and do it all together but if everything was organised<br>Coordinator: Ok so ideally it would have been "ok so the court is reserved for badminton this day this time and [facilitator] is coming to do it with you"<br>Facilitator: Exactly! That would have been really great. |                                                                                                                                                                                                                                                                                                                                                                                                         |
|                                   | End of program session                           | F9                     | Boy      | 15.4   | yeah or just do a um I don't know grab a room and have a little ten minute meeting and call [take out of class] all of those who are interested to come um yeah just that it would have been, it would have maybe helped a little.                                                                                                                                                                                                                             |                                                                                                                                                                                                                                                                                                                                                                                                         |

|                       |                                  |                        |                 |      |                                                                                                                                                                                                                                                                                                                                               |                                                                                                                                                                                                                                                                                                                                                                        |
|-----------------------|----------------------------------|------------------------|-----------------|------|-----------------------------------------------------------------------------------------------------------------------------------------------------------------------------------------------------------------------------------------------------------------------------------------------------------------------------------------------|------------------------------------------------------------------------------------------------------------------------------------------------------------------------------------------------------------------------------------------------------------------------------------------------------------------------------------------------------------------------|
| Other challenges      | Motivation issues                | End of program session | F10             | Girl | 16.0                                                                                                                                                                                                                                                                                                                                          | And then when um we couldn't find dates anymore and then um that's when pff I got a bit fed up I told myself yeah it's crap I don't have any activities.                                                                                                                                                                                                               |
|                       |                                  | End of program session | F12             | Girl | 16.2                                                                                                                                                                                                                                                                                                                                          | Coordinator: But you knew them right?<br>Facilitator: Yeah but when I went to see them [receivers] they said "oh we don't care"                                                                                                                                                                                                                                        |
|                       |                                  | End of program session | F3 (vs)         | Girl | 15.0                                                                                                                                                                                                                                                                                                                                          | Yeah it was rather easy. The only problem afterwards was that [receiver] thought that umm that the activities would be during um lessons. That's why she was motivated, to skip class                                                                                                                                                                                  |
|                       |                                  | SMS exchange           | F9              | Boy  | 15.4                                                                                                                                                                                                                                                                                                                                          | well it didn't go too well [the meeting] because one came and refused and the other didn't show                                                                                                                                                                                                                                                                        |
|                       |                                  | Mid program interview  | F4 (vs)         | Boy  | 14.0                                                                                                                                                                                                                                                                                                                                          | I told him "you know I have a bike in the basement I have two biked in the basement if you want we could do a bit of cycling I'll lend you a bike" and so on [and the receiver responded] "oh no pralimap I don't do"                                                                                                                                                  |
| Program clarity       | End of program session           | F2                     | Girl            | 14.0 | Like my friend [name of friend] she went to the pralimap thing but physically I mean ok she might have a little belly but she isn't she isn't fat she isn't um round or anything at all she is super pretty and all that and she had to go to the pralimap thing anyway not to mention that she doesn't eat anything so um I don't understand |                                                                                                                                                                                                                                                                                                                                                                        |
|                       | End of program session           | F6 (vs)                | Girl            | 15.0 | it's mostly um mostly yeah having fun with the person and exercising together. I don't really see the nutrition part because we didn't really talk about it and and we don't really know more than the other person I think.                                                                                                                  |                                                                                                                                                                                                                                                                                                                                                                        |
| Health issues         | SMS exchange                     | F8                     | Girl            | 15.4 | Hello, I have some bad news.. I am going to have to stop all physical activity due to an ice-skating accident and the discovery of scheuermann's disease which stops all type of physical activity. I'm really sorry for the inconvenience.                                                                                                   |                                                                                                                                                                                                                                                                                                                                                                        |
| Interpersonnal skills | SMS exchange                     | F2                     | Girl            | 14.0 | sometimes, I doubt my abilities :/ in any case I'm not talented for organizing outings ^^" But actually, since we're only 3 and not specially friends, I don't really know what we could do... Should we do it with our own friends?                                                                                                          |                                                                                                                                                                                                                                                                                                                                                                        |
|                       | Mid program interview            | F9                     | Boy             | 15.4 | Well because maybe I'm bossy well kind of bossy like for example pff if I think there's a bit of noise and I say to tone it down I think I might be a bit too bossy                                                                                                                                                                           |                                                                                                                                                                                                                                                                                                                                                                        |
|                       | Mid program interview            | F1 (vs)                | Girl            | 15.8 | well last time um because of [second facilitator] well because originally we were supposed to do it [the activity] together. And I saw that she wasn't trying and well on my own I was really struggling                                                                                                                                      |                                                                                                                                                                                                                                                                                                                                                                        |
| Good practice         | Regular contact with coordinator | End of program session | F7              | Girl | 16.4                                                                                                                                                                                                                                                                                                                                          | Coordinator: Ok why? [was it a good system]<br>Facilitator: well because we could get organised if we had something planned or not. And maybe we were in the middle of something                                                                                                                                                                                       |
|                       |                                  | End of program session | F6 (vs)         | Girl | 15.0                                                                                                                                                                                                                                                                                                                                          | [following conversation above]<br>Facilitator: same for me                                                                                                                                                                                                                                                                                                             |
|                       |                                  | End of program session | F9              | Boy  | 15.4                                                                                                                                                                                                                                                                                                                                          | Coordinator: And in terms of content because it's true that sometimes there wasn't much to say was it still useful being in touch?<br>Facilitator: Umm yeah I found it useful                                                                                                                                                                                          |
|                       |                                  | End of program session | F3 (vs)         | Girl | 15.0                                                                                                                                                                                                                                                                                                                                          | [following conversation above]<br>Facilitator: Yeah cause it helped us remember that it we really needed to do it (...) I had never forgotten but it, it remotivated me and stuff.                                                                                                                                                                                     |
|                       |                                  | End of program session | F1 (vs) and F12 | Girl | 15.8<br>16.2                                                                                                                                                                                                                                                                                                                                  | Coordinator: so what should the coordinator do if there are no responses to SMS<br>F1 (very successful facilitator-girl): See with the school<br>F12 (facilitator-girl): Yeah definitely<br>Coordinator: why?<br>F1: Yeah well I think like say the person has changed number and everything<br>F12: They also often have the internship times if it's to do with that |
| Physical activity     | End of program session           | F10                    | Girl            | 16.0 | They asked me "oh you can go ice skating" I said "yes" so yeah as soon as you talk more directly about activities yeah it's actually cool they said "oh really you can do activities and everything oh well that's cool". (...)                                                                                                               |                                                                                                                                                                                                                                                                                                                                                                        |

|                    |                        |         |      |      |                                                                                                                                                                                                                                 |
|--------------------|------------------------|---------|------|------|---------------------------------------------------------------------------------------------------------------------------------------------------------------------------------------------------------------------------------|
| Support of parents | End of program session | F6 (vs) | Girl | 15.0 | There was also her [receiver] mom she um we did three activities and my dad brought her once and her mom twice so um it's certain that if that hadn't been there since it was super far nah it wouldn't have been possible.     |
| Program commitment | Mid program interview  | F4 (vs) | Boy  | 14.0 | And just afterwards he told me "[swear word] they want me to do pralimap and everything" and I said "well why don't you want to do it? if you want I can offer to be your facilitator since we're neighbours it would be easy". |

RECEIVERS

| Section            | Topic                   | Person                 | Status    | Gender | Age  | Quote                                                                                                                                                                                                                                                                                                                                                                                                                           |                                                                                                                                                                                                                                                                                                                                                                                                                                                                                                                                           |
|--------------------|-------------------------|------------------------|-----------|--------|------|---------------------------------------------------------------------------------------------------------------------------------------------------------------------------------------------------------------------------------------------------------------------------------------------------------------------------------------------------------------------------------------------------------------------------------|-------------------------------------------------------------------------------------------------------------------------------------------------------------------------------------------------------------------------------------------------------------------------------------------------------------------------------------------------------------------------------------------------------------------------------------------------------------------------------------------------------------------------------------------|
| Social environment | Family relations        | R4d                    | Reluctant | Boy    | 15.8 | well since my step father works in the show business he often comes home late so I cook one day out of two I do it                                                                                                                                                                                                                                                                                                              |                                                                                                                                                                                                                                                                                                                                                                                                                                                                                                                                           |
|                    |                         | R4f                    | Passive   | Girl   | 15.3 | Receiver (passive receiver-girl): I am tired at the moment<br>Interviewer: why?<br>Receiver: because I have a lot of family problems and I don't sleep well. I think too much about it. So I think I'm in bad health                                                                                                                                                                                                            |                                                                                                                                                                                                                                                                                                                                                                                                                                                                                                                                           |
|                    | High school             | R4e                    | Reluctant | Boy    | 15.2 | Receiver: no it's the first time but it's different from being at home [being in boarding school]<br>Interviewer: so what's different from home?<br>Receiver: well you're there all the time with friends so in the evenings we chat and laugh                                                                                                                                                                                  |                                                                                                                                                                                                                                                                                                                                                                                                                                                                                                                                           |
|                    |                         | R4c                    | Passive   | Girl   | 15.9 | you never know how the others will react if you tell them something and most people here are, how to say it, really mean. They judge people based on physical appearance that's why we like to stay just the four of us that's why we stay in our own group.                                                                                                                                                                    |                                                                                                                                                                                                                                                                                                                                                                                                                                                                                                                                           |
|                    | Relationship with peers | R4d                    | Reluctant | Boy    | 15.8 | Interviewer: so what is a mate then?<br>Receiver: they're just people with who you laugh and all its not the 36 [friends] that I can actually open up to those are people who are always there for you.                                                                                                                                                                                                                         |                                                                                                                                                                                                                                                                                                                                                                                                                                                                                                                                           |
|                    |                         | R4e                    | Reluctant | Boy    | 15.2 | Receiver: badly because people from school most guys are thin and all that they chill and all talk to everyone laugh with everyone and it annoys me because I tell myself maybe if I stop eating I would talk to everyone and be in their shoes like<br>Interviewer: so with people here at school when you see them do you say hi?<br>Receiver: no I don't say anything I just stay with [name of best friend] and that's all. |                                                                                                                                                                                                                                                                                                                                                                                                                                                                                                                                           |
|                    |                         | R4a                    | Active    | Boy    | 17.6 | not really we see each other only here [high school] yeah otherwise we stay in touch via telephone otherwise we don't see each other outside.                                                                                                                                                                                                                                                                                   |                                                                                                                                                                                                                                                                                                                                                                                                                                                                                                                                           |
|                    |                         | R4f                    | Passive   | Girl   | 15.3 | Interviewer: so with your old friends how come you're not friends anymore?<br>Receiver: no idea because I think we didn't see each other anymore                                                                                                                                                                                                                                                                                |                                                                                                                                                                                                                                                                                                                                                                                                                                                                                                                                           |
|                    |                         | R4e                    | Reluctant | Boy    | 15.2 | Interviewer: and what bothers you why don't you want to talk to your family?<br>Receiver: because we're not of the same generation                                                                                                                                                                                                                                                                                              |                                                                                                                                                                                                                                                                                                                                                                                                                                                                                                                                           |
|                    | Health and overweight   | Defintition            | R4a       | Active | Boy  | 17.6                                                                                                                                                                                                                                                                                                                                                                                                                            | Interviewer: so what is health?<br>Receiver: to feel good<br>Interviewer: and that means?<br>Receiver: to feel good in your shoes not to be sick<br>Interviewer: and what is to feel good in your shoes?<br>Receiver: what can I say well feeling good not feeling fat                                                                                                                                                                                                                                                                    |
|                    |                         | Wanting to lose weight | R4b       | Active | Girl | 17.4                                                                                                                                                                                                                                                                                                                                                                                                                            | Receiver: well since everyone tells me I need to lose weight because of people staring (regard des gens) and all that I tell myself I don't care if people look and judge because for me it's my life it's my body and all that they're not the ones to tell me what I have to do. If I feel good I'll stay this way<br>Interviewer: so why then do you say you want to lose a little [weight]?<br>Receiver: it's mostly for clothes because often I can't find my size often I have to go in the big sizes and it bugs me a bit all that |

|    |                    |                         |         |           |      |                                                                                                                                                                                                                                  |                                                                                                                                                                                                                                                                                                                                                                                                                                                                                                                                                                                                                                                                            |
|----|--------------------|-------------------------|---------|-----------|------|----------------------------------------------------------------------------------------------------------------------------------------------------------------------------------------------------------------------------------|----------------------------------------------------------------------------------------------------------------------------------------------------------------------------------------------------------------------------------------------------------------------------------------------------------------------------------------------------------------------------------------------------------------------------------------------------------------------------------------------------------------------------------------------------------------------------------------------------------------------------------------------------------------------------|
| 1  |                    |                         |         |           |      |                                                                                                                                                                                                                                  |                                                                                                                                                                                                                                                                                                                                                                                                                                                                                                                                                                                                                                                                            |
| 2  |                    | R4c                     | Passive | Girl      | 15.9 | for me it depends on the days [successful healthy behaviour] if I ate well at the school cafeteria I shouldn't be hungry or sometimes I see my mom eat and it makes me want to go grab some cookies                              |                                                                                                                                                                                                                                                                                                                                                                                                                                                                                                                                                                                                                                                                            |
| 3  |                    |                         |         |           |      |                                                                                                                                                                                                                                  |                                                                                                                                                                                                                                                                                                                                                                                                                                                                                                                                                                                                                                                                            |
| 4  |                    | R4a                     | Active  | Boy       | 17.6 | there are times I'm not careful but also we don't have the luck of eating a balanced diet we don't eat much fruit and vegetable at mine so I don't really have the opportunity to be careful so sometimes I eat in excess but um |                                                                                                                                                                                                                                                                                                                                                                                                                                                                                                                                                                                                                                                                            |
| 5  |                    |                         |         |           |      |                                                                                                                                                                                                                                  |                                                                                                                                                                                                                                                                                                                                                                                                                                                                                                                                                                                                                                                                            |
| 6  |                    |                         |         |           |      |                                                                                                                                                                                                                                  |                                                                                                                                                                                                                                                                                                                                                                                                                                                                                                                                                                                                                                                                            |
| 7  |                    |                         |         |           |      |                                                                                                                                                                                                                                  |                                                                                                                                                                                                                                                                                                                                                                                                                                                                                                                                                                                                                                                                            |
| 8  |                    | PRALIMAP-INES           | R4c     | Passive   | Girl | 15.9                                                                                                                                                                                                                             | Interviewer: and how was it?<br>Receiver: it was ok<br>Interviewer: meaning?<br>Receiver: sometimes they only talked sometimes we moved<br>Interviewer: and you don't like talking?<br>Receiver: no                                                                                                                                                                                                                                                                                                                                                                                                                                                                        |
| 9  |                    |                         |         |           |      |                                                                                                                                                                                                                                  |                                                                                                                                                                                                                                                                                                                                                                                                                                                                                                                                                                                                                                                                            |
| 10 |                    |                         |         |           |      |                                                                                                                                                                                                                                  |                                                                                                                                                                                                                                                                                                                                                                                                                                                                                                                                                                                                                                                                            |
| 11 |                    |                         | R4f     | Passive   | Girl | 15.3                                                                                                                                                                                                                             | Interviewer: and were you aware of the activities in pralimap that you were offered<br>Receiver: no idea I said I didn't want to do it and that's it                                                                                                                                                                                                                                                                                                                                                                                                                                                                                                                       |
| 12 |                    | Lack of program clarity | R4b     | Active    | Girl | 17.4                                                                                                                                                                                                                             | Interviewer: and do you know about the peer activities in pralimap?<br>Receiver: no<br>Interviewer: were you not contacted by [name of facilitator]?<br>Receiver: oh yeah but I didn't think that was it                                                                                                                                                                                                                                                                                                                                                                                                                                                                   |
| 13 |                    |                         |         |           |      |                                                                                                                                                                                                                                  |                                                                                                                                                                                                                                                                                                                                                                                                                                                                                                                                                                                                                                                                            |
| 14 |                    |                         |         |           |      |                                                                                                                                                                                                                                  |                                                                                                                                                                                                                                                                                                                                                                                                                                                                                                                                                                                                                                                                            |
| 15 |                    |                         |         |           |      |                                                                                                                                                                                                                                  |                                                                                                                                                                                                                                                                                                                                                                                                                                                                                                                                                                                                                                                                            |
| 16 |                    |                         | R4e     | Reluctant | Boy  | 15.2                                                                                                                                                                                                                             | Interviewer: so what stopped you?<br>Receiver: I don't know<br>Interviewer: was it the way he invited you?<br>Receiver: no because I didn't know him so that's it                                                                                                                                                                                                                                                                                                                                                                                                                                                                                                          |
| 17 |                    | Potential barriers      | R4f     | Passive   | Girl | 15.3                                                                                                                                                                                                                             | Interviewer: so if I offered now what would you say?<br>Receiver: I don't know I think I would have said no<br>Interviewer: why?<br>Receiver: because I don't like doing activities with too many people<br>Interviewer: what if there were only 2 people<br>Receiver: oh then yes maybe                                                                                                                                                                                                                                                                                                                                                                                   |
| 18 |                    |                         |         |           |      |                                                                                                                                                                                                                                  |                                                                                                                                                                                                                                                                                                                                                                                                                                                                                                                                                                                                                                                                            |
| 19 |                    |                         |         |           |      |                                                                                                                                                                                                                                  |                                                                                                                                                                                                                                                                                                                                                                                                                                                                                                                                                                                                                                                                            |
| 20 | Program experience |                         |         |           |      |                                                                                                                                                                                                                                  |                                                                                                                                                                                                                                                                                                                                                                                                                                                                                                                                                                                                                                                                            |
| 21 |                    |                         |         |           |      |                                                                                                                                                                                                                                  |                                                                                                                                                                                                                                                                                                                                                                                                                                                                                                                                                                                                                                                                            |
| 22 |                    |                         |         |           |      |                                                                                                                                                                                                                                  |                                                                                                                                                                                                                                                                                                                                                                                                                                                                                                                                                                                                                                                                            |
| 23 |                    |                         |         |           |      |                                                                                                                                                                                                                                  |                                                                                                                                                                                                                                                                                                                                                                                                                                                                                                                                                                                                                                                                            |
| 24 |                    |                         |         |           |      |                                                                                                                                                                                                                                  |                                                                                                                                                                                                                                                                                                                                                                                                                                                                                                                                                                                                                                                                            |
| 25 |                    |                         |         |           |      |                                                                                                                                                                                                                                  |                                                                                                                                                                                                                                                                                                                                                                                                                                                                                                                                                                                                                                                                            |
| 26 |                    |                         |         |           |      |                                                                                                                                                                                                                                  |                                                                                                                                                                                                                                                                                                                                                                                                                                                                                                                                                                                                                                                                            |
| 27 |                    |                         |         |           |      |                                                                                                                                                                                                                                  |                                                                                                                                                                                                                                                                                                                                                                                                                                                                                                                                                                                                                                                                            |
| 28 |                    |                         |         |           |      |                                                                                                                                                                                                                                  |                                                                                                                                                                                                                                                                                                                                                                                                                                                                                                                                                                                                                                                                            |
| 29 |                    |                         |         |           |      |                                                                                                                                                                                                                                  |                                                                                                                                                                                                                                                                                                                                                                                                                                                                                                                                                                                                                                                                            |
| 30 |                    | Activity experience     | R4a     | Active    | Boy  | 17.6                                                                                                                                                                                                                             | Interviewer: and you felt comfortable? [during the activity]<br>Receiver: well not really at first because I didn't really know him, then getting to know him I felt more at ease.<br>(...)<br>Interviewer: And what did you do?<br>Receiver: we talked a lot<br>Interviewer: about what?<br>Receiver: we talked about ourselves he asked me why I participated in pralimap and told him and everything we talked about our jobs what we liked we talked about music too<br>Interviewer: all this whilst walking?<br>Receiver: yes for 2h<br>(...)<br>Interviewer: and so now you've become friends<br>Receiver: yes every time we see each other we say hi and everything |
| 31 |                    |                         |         |           |      |                                                                                                                                                                                                                                  |                                                                                                                                                                                                                                                                                                                                                                                                                                                                                                                                                                                                                                                                            |
| 32 |                    |                         |         |           |      |                                                                                                                                                                                                                                  |                                                                                                                                                                                                                                                                                                                                                                                                                                                                                                                                                                                                                                                                            |
| 33 |                    |                         |         |           |      |                                                                                                                                                                                                                                  |                                                                                                                                                                                                                                                                                                                                                                                                                                                                                                                                                                                                                                                                            |
| 34 |                    |                         |         |           |      |                                                                                                                                                                                                                                  |                                                                                                                                                                                                                                                                                                                                                                                                                                                                                                                                                                                                                                                                            |
| 35 |                    |                         |         |           |      |                                                                                                                                                                                                                                  |                                                                                                                                                                                                                                                                                                                                                                                                                                                                                                                                                                                                                                                                            |
| 36 |                    |                         |         |           |      |                                                                                                                                                                                                                                  |                                                                                                                                                                                                                                                                                                                                                                                                                                                                                                                                                                                                                                                                            |
| 37 |                    |                         |         |           |      |                                                                                                                                                                                                                                  |                                                                                                                                                                                                                                                                                                                                                                                                                                                                                                                                                                                                                                                                            |
| 38 |                    |                         |         |           |      |                                                                                                                                                                                                                                  |                                                                                                                                                                                                                                                                                                                                                                                                                                                                                                                                                                                                                                                                            |
| 39 |                    |                         |         |           |      |                                                                                                                                                                                                                                  |                                                                                                                                                                                                                                                                                                                                                                                                                                                                                                                                                                                                                                                                            |
| 40 |                    |                         |         |           |      |                                                                                                                                                                                                                                  |                                                                                                                                                                                                                                                                                                                                                                                                                                                                                                                                                                                                                                                                            |
| 41 |                    |                         |         |           |      |                                                                                                                                                                                                                                  |                                                                                                                                                                                                                                                                                                                                                                                                                                                                                                                                                                                                                                                                            |
| 42 |                    |                         |         |           |      |                                                                                                                                                                                                                                  |                                                                                                                                                                                                                                                                                                                                                                                                                                                                                                                                                                                                                                                                            |
| 43 |                    |                         |         |           |      |                                                                                                                                                                                                                                  |                                                                                                                                                                                                                                                                                                                                                                                                                                                                                                                                                                                                                                                                            |
| 44 |                    |                         |         |           |      |                                                                                                                                                                                                                                  |                                                                                                                                                                                                                                                                                                                                                                                                                                                                                                                                                                                                                                                                            |
| 45 |                    |                         |         |           |      |                                                                                                                                                                                                                                  |                                                                                                                                                                                                                                                                                                                                                                                                                                                                                                                                                                                                                                                                            |
| 46 |                    |                         |         |           |      |                                                                                                                                                                                                                                  |                                                                                                                                                                                                                                                                                                                                                                                                                                                                                                                                                                                                                                                                            |
