# Supplementary material for: Using facilitator–receiver peer dyads matched according to socioeconomic status to promote behaviour change in overweight adolescents: a feasibility study
Source: PubMed Central journal article supplement — BMJ Open. 2018 Jun 22;8(6):e019731. doi: 10.1136/bmjopen-2017-019731 (PMC6020946; doi:10.1136/bmjopen-2017-019731), 2018-06-22
Supplement: bmjopen-2017-019731supp001.pdf [file bmjopen-2017-019731supp001.pdf]

Supplementary file 1: Contribution of each source of data collection to assess feasibility questions

| Feasibility criteria | Outcomes of interest              | Screening session | Facilitator training session | Facilitator mid-program interview | Facilitator end-of-program session | Facilitator SMS exchanges | Facilitator Telephone calls | Nutritional activities | Receiver individual interviews |
|----------------------|-----------------------------------|-------------------|------------------------------|-----------------------------------|------------------------------------|---------------------------|-----------------------------|------------------------|--------------------------------|
| Demand               | Expressed interest                | x                 |                              |                                   |                                    |                           |                             |                        | x                              |
|                      | Characteristics                   | x                 |                              |                                   |                                    |                           |                             |                        | x                              |
| Acceptability        | Participation                     |                   | x                            |                                   |                                    | x                         | x                           | x                      |                                |
|                      | Appropriateness                   |                   | x                            | x                                 | x                                  | x                         | x                           |                        | x                              |
| Implementation       | Satisfaction                      |                   | x                            | x                                 | x                                  |                           |                             |                        | x                              |
|                      | Intervention dose                 |                   |                              |                                   |                                    |                           |                             | x                      |                                |
| Practicality         | Support needed                    |                   |                              |                                   |                                    | x                         | x                           |                        |                                |
|                      | Implementation ease or difficulty |                   | x                            | x                                 | x                                  | x                         | x                           |                        | x                              |
