# Supplementary material for: Using facilitator–receiver peer dyads matched according to socioeconomic status to promote behaviour change in overweight adolescents: a feasibility study
Source: PubMed Central journal article supplement — BMJ Open. 2018 Jun 22;8(6):e019731. doi: 10.1136/bmjopen-2017-019731 (PMC6020946; doi:10.1136/bmjopen-2017-019731), 2018-06-22
Supplement: bmjopen-2017-019731supp002.pdf [file bmjopen-2017-019731supp002.pdf]

Supplementary file 2: individual characteristics of each facilitator and receiver

|                         | Entrepreneur                          |                                       |                          |                          |               |                                       |               | Ambassadors              |                                       |                          |                          |                          | Active receiver                       |                          |                          |                          |                          |                                       |                          |               |
|-------------------------|---------------------------------------|---------------------------------------|--------------------------|--------------------------|---------------|---------------------------------------|---------------|--------------------------|---------------------------------------|--------------------------|--------------------------|--------------------------|---------------------------------------|--------------------------|--------------------------|--------------------------|--------------------------|---------------------------------------|--------------------------|---------------|
| Student number          | 61142                                 | 61177                                 | 101052                   | 141026                   | 151039        | 191099                                | 241026        | 50011                    | 70016                                 | 150016                   | 210005                   | 210012                   | 61147                                 | 141052                   | 141058                   | 151098                   | 151116                   | 191134                                | 211001                   | 241089        |
| Measurement time point  | T0                                    | T0                                    | T0                       | T0                       | T0            | T0                                    | T0            | T1                       | T1                                    | T1                       | T1                       | T1                       | T0                                    | T0                       | T0                       | T0                       | T0                       | T0                                    | T0                       | T0            |
| Gender                  | Girl                                  | Girl                                  | Girl                     | Boy                      | Boy           | Girl                                  | Girl          | Girl                     | Boy                                   | Boy                      | Girl                     | Girl                     | Girl                                  | Boy                      | Boy                      | Boy                      | Girl                     | Girl                                  | Girl                     | Girl          |
| School type             | General and technological High School | General and technological High School | Professional High School | Professional High School | Middle School | General and technological High School | Middle School | Professional High School | General and technological High School | Professional High School | Professional High School | Professional High School | General and technological High School | Professional High School | Professional High School | Professional High School | Professional High School | General and technological High School | Professional High School | Middle School |
| Exact age               | 15.04                                 | 15.39                                 | 15.94                    | 16.54                    | 13.97         | 15.02                                 | 13.99         | 16.38                    | 15.44                                 | 16.15                    | 16.23                    | 15.77                    | 15.62                                 | 16.58                    | 16.12                    | 17.55                    | 17.41                    | 14.90                                 | 15.87                    | 14.22         |
| BMI                     | 22.49                                 | 19.04                                 | 23.07                    | 25.92                    | 20.06         | 24.31                                 | 21.55         | 27.17                    | 23.70                                 | 27.75                    | 28.98                    | 27.43                    | 23.76                                 | 32.97                    | 25.73                    | 28.99                    | 37.42                    | 24.30                                 | 25.83                    | 31.68         |
| FAS score               | 5                                     | 5                                     | 3                        | 4                        | 3             | 4                                     | 4             | 4                        | 5                                     | 5                        | 5                        | 4                        | 5                                     | 4                        | 2                        | 5                        | 5                        | 4                                     | 4                        | 5             |
| EAT 26 score            | 3.8                                   | 8                                     | 7.6                      | 8.3                      | .             | 12.8                                  | .             | 8.9                      | 15.3                                  | 6.4                      | 29.3                     | 7.6                      | 35.8                                  | 15.3                     | 11.5                     | 2.5                      | 10.2                     | 17.9                                  | 8.9                      | 14.1          |
| HAD score               | 28.57                                 | 9.52                                  | 14.29                    | 14.29                    | 9.52          | 38.10                                 | 11.90         | 19.05                    | 26.19                                 | 16.67                    | 35.71                    | 28.57                    | 42.86                                 | 35.71                    | 35.71                    | 26.19                    | 7.14                     | 21.43                                 | 23.81                    | 35.71         |
| Anxiety score           | 38.10                                 | 19.05                                 | 19.05                    | 23.81                    | .             | 52.38                                 | .             | 28.57                    | 33.33                                 | 14.29                    | 52.38                    | 38.10                    | 61.90                                 | 42.86                    | 52.38                    | 19.05                    | 9.52                     | 33.33                                 | 38.10                    | 52.38         |
| Depression score        | 19.05                                 | 0.00                                  | 9.52                     | 4.76                     | 0.00          | 23.81                                 | 0.00          | 9.52                     | 19.05                                 | 19.05                    | 19.05                    | 19.05                    | 23.81                                 | 28.57                    | 19.05                    | 33.33                    | 4.76                     | 9.52                                  | 9.52                     | 19.05         |
| Physical activity level | Moderate                              | High                                  | High                     | High                     | .             | Low                                   | .             | Low                      | Moderate                              | Low                      | Low                      | Moderate                 | Moderate                              | Moderate                 | High                     | Moderate                 | Moderate                 | Moderate                              | Moderate                 | High          |
| KIDSCREEN score         | 43.35                                 | 55.07                                 | 44.48                    | 43.35                    | 66.86         | 34.70                                 | 48.29         | 59.85                    | 45.67                                 | 46.94                    | 41.24                    | 43.35                    | 41.24                                 | 40.24                    | 48.29                    | 38.34                    | 66.86                    | 46.94                                 | 46.94                    | 48.29         |
