# Supplementary material for: Using facilitator–receiver peer dyads matched according to socioeconomic status to promote behaviour change in overweight adolescents: a feasibility study
Source: PubMed Central journal article supplement — BMJ Open. 2018 Jun 22;8(6):e019731. doi: 10.1136/bmjopen-2017-019731 (PMC6020946; doi:10.1136/bmjopen-2017-019731), 2018-06-22
Supplement: bmjopen-2017-019731supp003.pdf [file bmjopen-2017-019731supp003.pdf]

Supplementary file 3 – SMS and Calls

| SMS received | Plan training | Plan call | Plan interview | Activity feedback | Plan end session | Total SMS sent | Total received | nb contact days | % no answer |
|--------------|---------------|-----------|----------------|-------------------|------------------|----------------|----------------|-----------------|-------------|
| <b>F1</b>    | 2             | 69        | 9              | 34                | 25               | 147            | 142            | 54              | 4           |
| F2           | 1             | 30        | 11             | 46                | 1                | 122            | 108            | 47              | 4           |
| <b>F3</b>    | 11            | 47        | 3              | 41                | 6                | 140            | 112            | 57              | 9           |
| <b>F4</b>    | 5             | 59        | 3              | 36                | 44               | 180            | 147            | 67              | 11          |
| F5           | 0             | 4         | 0              | 5                 | 0                | 24             | 15             | 12              | 29          |
| <b>F6</b>    | 6             | 25        | 14             | 25                | 3                | 89             | 76             | 43              | 9           |
| F7           | 4             | 43        | 5              | 29                | 5                | 88             | 92             | 38              | 0           |
| F8           | 5             | 14        | 6              | 37                | 2                | 88             | 66             | 36              | 14          |
| F9           | 5             | 21        | 4              | 18                | 6                | 78             | 58             | 42              | 17          |
| F10          | 0             | 21        | 1              | 43                | 9                | 95             | 75             | 41              | 16          |
| F11          | 1             | 6         | 1              | 5                 | 3                | 29             | 16             | 23              | 38          |
| F12          | 1             | 32        | 11             | 30                | 0                | 66             | 83             | 30              | 0           |

Table 3a: Content and number of SMS exchanges between the coordinator and the facilitators

|           | Missed call | Phone conversations | % missed |
|-----------|-------------|---------------------|----------|
| <b>F1</b> | 2           | 8                   | 20       |
| F2        | 0           | 12                  | 0        |
| <b>F3</b> | 1           | 15                  | 6        |
| <b>F4</b> | 3           | 17                  | 15       |
| F5        | 26          | 5                   | 84       |
| <b>F6</b> | 0           | 11                  | 0        |
| F7        | 0           | 10                  | 0        |
| F8        | 18          | 4                   | 82       |
| F9        | 0           | 4                   | 0        |
| F10       | 3           | 10                  | 23       |
| F11       | 26          | 5                   | 84       |
| F12       | 11          | 9                   | 55       |

Table 3b: Number of phone conversations and missed calls between the coordinator and the facilitators

Note: The more successful facilitators are in bold and underlined
